# Supplementary material for: Biomarkers to predict risk of venous thromboembolism in patients with rheumatoid arthritis receiving tofacitinib or tumour necrosis factor inhibitors
Source: HighWire-hosted journal article supplement (doi:10.1136/rmdopen-2022-002571), 2022-11-01
Supplement: rmdopen-2022-002571supp002_data_supplement.xlsx [file rmdopen-2022-002571supp002_data_supplement.xlsx]

## Sheet: Sheet 1
Full statistical comparisons for Tiers 1–4 biomarkers and VTE (exploratory biomarker dataset, with the exception of CRP [full clinical dataset])
Biomarker name	Tier	Sub-hypothesis names	p-value type	p-value	FDR	Effect size type	Effect size	SE	Lower 95% CI	Upper 95% CI
CRP	Tier 1	A.0.bl Overall, possible interaction	ANOVA	0.244	0.244	NA
CRP (full clinical dataset)	Tier 1	A.1.bl Overall, no interaction	contrast (X)	0.139	0.139	HR	0.828	0.127	0.645	1.063
CRP (full clinical dataset)	Tier 1	A.1.bl Tofacitinib 10mg	contrast (X)	0.822	0.822	HR	0.962	0.174	0.684	1.352
CRP (full clinical dataset)	Tier 1	A.1.bl Tofacitinib 5mg	contrast (X)	0.283	0.498	HR	0.769	0.245	0.476	1.242
CRP (full clinical dataset)	Tier 1	A.1.bl TNFi	contrast (X)	0.081	0.244	HR	0.609	0.284	0.349	1.064
CRP (full clinical dataset)	Tier 1	A.0.12m Overall, possible interaction	ANOVA	0.681	0.681	NA
CRP (full clinical dataset)	Tier 1	A.1.12m Overall, no interaction	contrast (X)	0.226	0.226	HR	1.173	0.132	0.906	1.519
CRP (full clinical dataset)	Tier 1	A.1.12m Tofacitinib 10mg	contrast (X)	0.385	0.385	HR	1.16	0.171	0.83	1.62
CRP (full clinical dataset)	Tier 1	A.1.12m Tofacitinib 5mg	contrast (X)	0.439	0.439	HR	1.222	0.259	0.735	2.033
CRP (full clinical dataset)	Tier 1	A.1.12m TNFi	contrast (X)	0.704	0.977	HR	1.142	0.349	0.576	2.261
CRP (full clinical dataset)	Tier 1	B.0.bl Overall	interaction	0.371	0.687	NA
CRP (full clinical dataset)	Tier 1	B.1.bl Tofacitinib 10mg vs TNFi	contrast (X)	0.171	0.429	HR	1.579	0.333	0.821	3.034
CRP (full clinical dataset)	Tier 1	B.1.bl Tofacitinib 5mg vs TNFi	contrast (X)	0.535	0.792	HR	1.262	0.375	0.605	2.634
CRP (full clinical dataset)	Tier 1	B.0.12m Overall	interaction	0.982	0.982	NA
CRP (full clinical dataset)	Tier 1	B.1.12m Tofacitinib 10mg vs TNFi	contrast (X)	0.968	0.968	HR	1.016	0.388	0.475	2.174
CRP (full clinical dataset)	Tier 1	B.1.12m Tofacitinib 5mg vs TNFi	contrast (X)	0.875	0.875	HR	1.071	0.435	0.457	2.51
CRP (full clinical dataset)	Tier 1	C.0 Overall	ANOVA	0.295	0.442	NA
CRP (full clinical dataset)	Tier 1	C.1.all Tofacitinib 10mg vs TNFi	contrast (Arm)	0.814	0.814	DeltaLog	0.009	0.04	-0.069	0.088
CRP (full clinical dataset)	Tier 1	C.1.all Tofacitinib 5mg vs TNFi	contrast (Arm)	0.109	0.327	DeltaLog	0.064	0.04	-0.014	0.143
CRP (full clinical dataset)	Tier 1	C.2.ctrl Tofacitinib 10mg vs TNFi	contrast (Arm)	0.883	0.883	DeltaLog	0.006	0.04	-0.073	0.085
CRP (full clinical dataset)	Tier 1	C.2.ctrl Tofacitinib 5mg vs TNFi	contrast (Arm)	0.119	0.281	DeltaLog	0.063	0.04	-0.016	0.142
CRP (full clinical dataset)	Tier 1	C.3.case Tofacitinib 10mg vs TNFi	contrast (Arm)	0.164	0.491	DeltaLog	0.503	0.361	-0.205	1.211
CRP (full clinical dataset)	Tier 1	C.3.case Tofacitinib 5mg vs TNFi	contrast (Arm)	0.435	0.952	DeltaLog	0.321	0.411	-0.484	1.126
CRP (full clinical dataset)	Tier 1	D.0 Overall	ANOVA	2.27e-09	6.8e-09	NA
CRP (full clinical dataset)	Tier 1	D.1.all Tofacitinib 10mg vs TNFi	contrast (Arm)	1.62e-11	4.87e-11	DeltaLog	-0.322	0.048	-0.415	-0.228
CRP (full clinical dataset)	Tier 1	D.1.all Tofacitinib 5mg vs TNFi	contrast (Arm)	0.000271	0.000814	DeltaLog	-0.172	0.047	-0.265	-0.079
CRP (full clinical dataset)	Tier 1	D.2.ctrl Tofacitinib 10mg vs TNFi	contrast (Arm)	1.51e-11	4.52e-11	DeltaLog	-0.324	0.048	-0.418	-0.23
CRP (full clinical dataset)	Tier 1	D.2.ctrl Tofacitinib 5mg vs TNFi	contrast (Arm)	0.00027	0.000811	DeltaLog	-0.173	0.047	-0.266	-0.08
CRP (full clinical dataset)	Tier 1	D.3.case Tofacitinib 10mg vs TNFi	contrast (Arm)	0.485	0.485	DeltaLog	-0.365	0.522	-1.389	0.659
CRP (full clinical dataset)	Tier 1	D.3.case Tofacitinib 5mg vs TNFi	contrast (Arm)	0.755	0.755	DeltaLog	-0.182	0.585	-1.329	0.964
CRP (full clinical dataset)	Tier 1	E.0 Overall	ANOVA	0.638	0.638	NA
CRP (full clinical dataset)	Tier 1	E.1 Tofacitinib 10mg	contrast (CFB)	0.366	0.366	HR	1.172	0.176	0.831	1.655
CRP (full clinical dataset)	Tier 1	E.1 Tofacitinib 5mg	contrast (CFB)	0.508	0.656	HR	1.196	0.27	0.704	2.032
CRP (full clinical dataset)	Tier 1	E.1 TNFi	contrast (CFB)	0.508	0.762	HR	1.276	0.368	0.62	2.625
CRP (full clinical dataset)	Tier 1	F.0 Overall	interaction	0.979	0.979	NA
CRP (full clinical dataset)	Tier 1	F.1 Tofacitinib 10mg vs TNFi	contrast (CFB)	0.836	0.836	HR	0.919	0.408	0.413	2.044
CRP (full clinical dataset)	Tier 1	F.1 Tofacitinib 5mg vs TNFi	contrast (CFB)	0.888	0.888	HR	0.937	0.457	0.383	2.295
DDIM	Tier 1	A.0.bl Overall, possible interaction	ANOVA	0.18	0.244	NA
DDIM	Tier 1	A.1.bl Overall, no interaction	contrast (X)	0.042	0.127	HR	1.26	0.114	1.008	1.575
DDIM	Tier 1	A.1.bl Tofacitinib 10mg	contrast (X)	0.043	0.13	HR	1.318	0.137	1.008	1.723
DDIM	Tier 1	A.1.bl Tofacitinib 5mg	contrast (X)	0.332	0.498	HR	1.315	0.282	0.756	2.286
DDIM	Tier 1	A.1.bl TNFi	contrast (X)	0.915	0.915	HR	1.027	0.249	0.63	1.674
DDIM	Tier 1	A.0.12m Overall, possible interaction	ANOVA	0.000402	0.001	NA
DDIM	Tier 1	A.1.12m Overall, no interaction	contrast (X)	0.000702	0.002	HR	1.748	0.165	1.266	2.415
DDIM	Tier 1	A.1.12m Tofacitinib 10mg	contrast (X)	0.001	0.003	HR	2.063	0.223	1.333	3.194
DDIM	Tier 1	A.1.12m Tofacitinib 5mg	contrast (X)	0.051	0.152	HR	1.912	0.331	0.998	3.66
DDIM	Tier 1	A.1.12m TNFi	contrast (X)	0.977	0.977	HR	1.008	0.277	0.585	1.735
DDIM	Tier 1	B.0.bl Overall	interaction	0.687	0.687	NA
DDIM	Tier 1	B.1.bl Tofacitinib 10mg vs TNFi	contrast (X)	0.379	0.429	HR	1.284	0.284	0.736	2.238
DDIM	Tier 1	B.1.bl Tofacitinib 5mg vs TNFi	contrast (X)	0.511	0.792	HR	1.28	0.376	0.612	2.677
DDIM	Tier 1	B.0.12m Overall	interaction	0.171	0.262	NA
DDIM	Tier 1	B.1.12m Tofacitinib 10mg vs TNFi	contrast (X)	0.043	0.11	HR	2.047	0.355	1.021	4.103
DDIM	Tier 1	B.1.12m Tofacitinib 5mg vs TNFi	contrast (X)	0.138	0.414	HR	1.896	0.431	0.814	4.417
DDIM	Tier 1	C.0 Overall	ANOVA	0.794	0.794	NA
DDIM	Tier 1	C.1.all Tofacitinib 10mg vs TNFi	contrast (Arm)	0.736	0.814	DeltaLog	-0.039	0.115	-0.265	0.187
DDIM	Tier 1	C.1.all Tofacitinib 5mg vs TNFi	contrast (Arm)	0.349	0.349	DeltaLog	-0.125	0.133	-0.385	0.136
DDIM	Tier 1	C.2.ctrl Tofacitinib 10mg vs TNFi	contrast (Arm)	0.485	0.728	DeltaLog	-0.09	0.129	-0.342	0.162
DDIM	Tier 1	C.2.ctrl Tofacitinib 5mg vs TNFi	contrast (Arm)	0.281	0.281	DeltaLog	-0.16	0.148	-0.45	0.131
DDIM	Tier 1	C.3.case Tofacitinib 10mg vs TNFi	contrast (Arm)	0.545	0.659	DeltaLog	0.157	0.259	-0.351	0.665
DDIM	Tier 1	C.3.case Tofacitinib 5mg vs TNFi	contrast (Arm)	0.952	0.952	DeltaLog	0.018	0.301	-0.571	0.607
DDIM	Tier 1	D.0 Overall	ANOVA	0.39	0.39	NA
DDIM	Tier 1	D.1.all Tofacitinib 10mg vs TNFi	contrast (Arm)	0.665	0.665	DeltaLog	-0.044	0.102	-0.245	0.156
DDIM	Tier 1	D.1.all Tofacitinib 5mg vs TNFi	contrast (Arm)	0.628	0.628	DeltaLog	-0.057	0.118	-0.288	0.174
DDIM	Tier 1	D.2.ctrl Tofacitinib 10mg vs TNFi	contrast (Arm)	0.307	0.307	DeltaLog	-0.11	0.108	-0.322	0.102
DDIM	Tier 1	D.2.ctrl Tofacitinib 5mg vs TNFi	contrast (Arm)	0.242	0.242	DeltaLog	-0.146	0.125	-0.391	0.099
DDIM	Tier 1	D.3.case Tofacitinib 10mg vs TNFi	contrast (Arm)	0.196	0.295	DeltaLog	0.357	0.276	-0.185	0.899
DDIM	Tier 1	D.3.case Tofacitinib 5mg vs TNFi	contrast (Arm)	0.122	0.183	DeltaLog	0.493	0.319	-0.132	1.118
DDIM	Tier 1	E.0 Overall	ANOVA	0.003	0.009	NA
DDIM	Tier 1	E.1 Tofacitinib 10mg	contrast (CFB)	0.007	0.02	HR	2.024	0.26	1.215	3.371
DDIM	Tier 1	E.1 Tofacitinib 5mg	contrast (CFB)	0.339	0.656	HR	2.32	0.881	0.413	13.044
DDIM	Tier 1	E.1 TNFi	contrast (CFB)	0.843	0.843	HR	0.934	0.342	0.478	1.828
DDIM	Tier 1	F.0 Overall	interaction	0.153	0.253	NA
DDIM	Tier 1	F.1 Tofacitinib 10mg vs TNFi	contrast (CFB)	0.071	0.214	HR	2.166	0.429	0.935	5.018
DDIM	Tier 1	F.1 Tofacitinib 5mg vs TNFi	contrast (CFB)	0.332	0.536	HR	2.483	0.938	0.395	15.609
DDIM	Tier 1	G.0	contrast (Group)	0.008	0.015	DeltaLog	0.422	0.153	0.116	0.727
DDIM	Tier 1	G.1	contrast (Group)	0.035	0.044	DeltaLog	0.363	0.166	0.027	0.7
TPO	Tier 1	A.0.bl Overall, possible interaction	ANOVA	0.089	0.244	NA
TPO	Tier 1	A.1.bl Overall, no interaction	contrast (X)	0.086	0.128	HR	1.365	0.181	0.957	1.945
TPO	Tier 1	A.1.bl Tofacitinib 10mg	contrast (X)	0.105	0.157	HR	1.555	0.272	0.913	2.649
TPO	Tier 1	A.1.bl Tofacitinib 5mg	contrast (X)	0.514	0.514	HR	1.259	0.353	0.63	2.514
TPO	Tier 1	A.1.bl TNFi	contrast (X)	0.758	0.915	HR	1.108	0.332	0.578	2.124
TPO	Tier 1	A.0.12m Overall, possible interaction	ANOVA	0.032	0.048	NA
TPO	Tier 1	A.1.12m Overall, no interaction	contrast (X)	0.04	0.059	HR	1.41	0.167	1.017	1.955
TPO	Tier 1	A.1.12m Tofacitinib 10mg	contrast (X)	0.008	0.011	HR	1.752	0.21	1.16	2.645
TPO	Tier 1	A.1.12m Tofacitinib 5mg	contrast (X)	0.429	0.439	HR	1.313	0.345	0.668	2.581
TPO	Tier 1	A.1.12m TNFi	contrast (X)	0.618	0.977	HR	0.838	0.354	0.419	1.678
TPO	Tier 1	B.0.bl Overall	interaction	0.582	0.687	NA
TPO	Tier 1	B.1.bl Tofacitinib 10mg vs TNFi	contrast (X)	0.429	0.429	HR	1.403	0.428	0.606	3.249
TPO	Tier 1	B.1.bl Tofacitinib 5mg vs TNFi	contrast (X)	0.792	0.792	HR	1.136	0.485	0.439	2.941
TPO	Tier 1	B.0.12m Overall	interaction	0.175	0.262	NA
TPO	Tier 1	B.1.12m Tofacitinib 10mg vs TNFi	contrast (X)	0.073	0.11	HR	2.09	0.412	0.932	4.683
TPO	Tier 1	B.1.12m Tofacitinib 5mg vs TNFi	contrast (X)	0.364	0.546	HR	1.566	0.494	0.595	4.127
TPO	Tier 1	C.0 Overall	ANOVA	0.175	0.442	NA
TPO	Tier 1	C.1.all Tofacitinib 10mg vs TNFi	contrast (Arm)	0.017	0.051	DeltaLog	-0.126	0.053	-0.229	-0.022
TPO	Tier 1	C.1.all Tofacitinib 5mg vs TNFi	contrast (Arm)	0.249	0.349	DeltaLog	-0.07	0.061	-0.189	0.049
TPO	Tier 1	C.2.ctrl Tofacitinib 10mg vs TNFi	contrast (Arm)	0.014	0.042	DeltaLog	-0.144	0.059	-0.259	-0.029
TPO	Tier 1	C.2.ctrl Tofacitinib 5mg vs TNFi	contrast (Arm)	0.236	0.281	DeltaLog	-0.08	0.068	-0.213	0.052
TPO	Tier 1	C.3.case Tofacitinib 10mg vs TNFi	contrast (Arm)	0.659	0.659	DeltaLog	-0.052	0.119	-0.286	0.181
TPO	Tier 1	C.3.case Tofacitinib 5mg vs TNFi	contrast (Arm)	0.833	0.952	DeltaLog	-0.029	0.137	-0.298	0.24
TPO	Tier 1	D.0 Overall	ANOVA	0.033	0.049	NA
TPO	Tier 1	D.1.all Tofacitinib 10mg vs TNFi	contrast (Arm)	0.011	0.016	DeltaLog	0.115	0.045	0.027	0.203
TPO	Tier 1	D.1.all Tofacitinib 5mg vs TNFi	contrast (Arm)	0.026	0.039	DeltaLog	0.115	0.052	0.014	0.217
TPO	Tier 1	D.2.ctrl Tofacitinib 10mg vs TNFi	contrast (Arm)	0.087	0.13	DeltaLog	0.083	0.048	-0.012	0.177
TPO	Tier 1	D.2.ctrl Tofacitinib 5mg vs TNFi	contrast (Arm)	0.085	0.127	DeltaLog	0.096	0.056	-0.013	0.204
TPO	Tier 1	D.3.case Tofacitinib 10mg vs TNFi	contrast (Arm)	0.009	0.027	DeltaLog	0.319	0.122	0.08	0.559
TPO	Tier 1	D.3.case Tofacitinib 5mg vs TNFi	contrast (Arm)	0.086	0.183	DeltaLog	0.242	0.141	-0.035	0.518
TPO	Tier 1	E.0 Overall	ANOVA	0.172	0.258	NA
TPO	Tier 1	E.1 Tofacitinib 10mg	contrast (CFB)	0.102	0.153	HR	1.571	0.276	0.914	2.7
TPO	Tier 1	E.1 Tofacitinib 5mg	contrast (CFB)	0.656	0.656	HR	1.195	0.4	0.546	2.615
TPO	Tier 1	E.1 TNFi	contrast (CFB)	0.428	0.762	HR	0.587	0.673	0.157	2.195
TPO	Tier 1	F.0 Overall	interaction	0.168	0.253	NA
TPO	Tier 1	F.1 Tofacitinib 10mg vs TNFi	contrast (CFB)	0.174	0.261	HR	2.678	0.724	0.647	11.077
TPO	Tier 1	F.1 Tofacitinib 5mg vs TNFi	contrast (CFB)	0.358	0.536	HR	2.037	0.773	0.447	9.273
TPO	Tier 1	G.0	contrast (Group)	0.276	0.276	DeltaLog	0.094	0.085	-0.077	0.265
TPO	Tier 1	G.1	contrast (Group)	0.044	0.044	DeltaLog	0.166	0.08	0.005	0.328
APOC3	Tier 2	A.0.bl Overall, possible interaction	ANOVA	0.738	0.738	NA
APOC3	Tier 2	A.1.bl Overall, no interaction	contrast (X)	0.78	0.886	HR	1.033	0.116	0.822	1.298
APOC3	Tier 2	A.1.bl Tofacitinib 10mg	contrast (X)	0.552	0.759	HR	1.09	0.145	0.821	1.447
APOC3	Tier 2	A.1.bl Tofacitinib 5mg	contrast (X)	0.465	0.512	HR	0.809	0.29	0.458	1.429
APOC3	Tier 2	A.1.bl TNFi	contrast (X)	0.569	0.782	HR	1.164	0.267	0.69	1.965
APOC3	Tier 2	A.0.12m Overall, possible interaction	ANOVA	0.945	0.945	NA
APOC3	Tier 2	A.1.12m Overall, no interaction	contrast (X)	0.698	0.779	HR	0.934	0.175	0.663	1.317
APOC3	Tier 2	A.1.12m Tofacitinib 10mg	contrast (X)	0.684	0.84	HR	0.915	0.22	0.594	1.407
APOC3	Tier 2	A.1.12m Tofacitinib 5mg	contrast (X)	0.753	0.753	HR	0.885	0.387	0.415	1.891
APOC3	Tier 2	A.1.12m TNFi	contrast (X)	0.805	0.982	HR	1.115	0.442	0.469	2.652
APOC3	Tier 2	B.0.bl Overall	interaction	0.551	0.64	NA
APOC3	Tier 2	B.1.bl Tofacitinib 10mg vs TNFi	contrast (X)	0.828	0.91	HR	0.936	0.304	0.516	1.699
APOC3	Tier 2	B.1.bl Tofacitinib 5mg vs TNFi	contrast (X)	0.355	0.651	HR	0.695	0.394	0.321	1.503
APOC3	Tier 2	B.0.12m Overall	interaction	0.901	0.982	NA
APOC3	Tier 2	B.1.12m Tofacitinib 10mg vs TNFi	contrast (X)	0.689	0.947	HR	0.82	0.495	0.311	2.164
APOC3	Tier 2	B.1.12m Tofacitinib 5mg vs TNFi	contrast (X)	0.694	0.954	HR	0.794	0.587	0.251	2.509
APOC3	Tier 2	C.0 Overall	ANOVA	0.678	0.746	NA
APOC3	Tier 2	C.1.all Tofacitinib 10mg vs TNFi	contrast (Arm)	0.584	0.855	DeltaLog	0.042	0.077	-0.109	0.194
APOC3	Tier 2	C.1.all Tofacitinib 5mg vs TNFi	contrast (Arm)	0.234	0.457	DeltaLog	0.106	0.089	-0.069	0.281
APOC3	Tier 2	C.2.ctrl Tofacitinib 10mg vs TNFi	contrast (Arm)	0.534	0.84	DeltaLog	0.054	0.086	-0.116	0.223
APOC3	Tier 2	C.2.ctrl Tofacitinib 5mg vs TNFi	contrast (Arm)	0.145	0.318	DeltaLog	0.146	0.1	-0.05	0.341
APOC3	Tier 2	C.3.case Tofacitinib 10mg vs TNFi	contrast (Arm)	0.963	0.963	DeltaLog	-0.008	0.175	-0.35	0.334
APOC3	Tier 2	C.3.case Tofacitinib 5mg vs TNFi	contrast (Arm)	0.784	0.917	DeltaLog	-0.056	0.202	-0.452	0.341
APOC3	Tier 2	D.0 Overall	ANOVA	0.765	0.841	NA
APOC3	Tier 2	D.1.all Tofacitinib 10mg vs TNFi	contrast (Arm)	0.443	0.61	DeltaLog	0.044	0.057	-0.068	0.156
APOC3	Tier 2	D.1.all Tofacitinib 5mg vs TNFi	contrast (Arm)	0.229	0.36	DeltaLog	0.08	0.066	-0.05	0.21
APOC3	Tier 2	D.2.ctrl Tofacitinib 10mg vs TNFi	contrast (Arm)	0.358	0.437	DeltaLog	0.057	0.062	-0.064	0.178
APOC3	Tier 2	D.2.ctrl Tofacitinib 5mg vs TNFi	contrast (Arm)	0.248	0.303	DeltaLog	0.083	0.072	-0.058	0.223
APOC3	Tier 2	D.3.case Tofacitinib 10mg vs TNFi	contrast (Arm)	0.791	0.934	DeltaLog	-0.042	0.158	-0.352	0.268
APOC3	Tier 2	D.3.case Tofacitinib 5mg vs TNFi	contrast (Arm)	0.759	0.776	DeltaLog	0.056	0.182	-0.301	0.413
APOC3	Tier 2	E.0 Overall	ANOVA	0.881	0.881	NA
APOC3	Tier 2	E.1 Tofacitinib 10mg	contrast (CFB)	0.729	0.855	HR	0.86	0.435	0.367	2.018
APOC3	Tier 2	E.1 Tofacitinib 5mg	contrast (CFB)	0.59	0.721	HR	1.223	0.373	0.588	2.543
APOC3	Tier 2	E.1 TNFi	contrast (CFB)	0.619	0.973	HR	1.263	0.47	0.503	3.172
APOC3	Tier 2	F.0 Overall	interaction	0.728	0.89	NA
APOC3	Tier 2	F.1 Tofacitinib 10mg vs TNFi	contrast (CFB)	0.55	0.864	HR	0.681	0.642	0.193	2.397
APOC3	Tier 2	F.1 Tofacitinib 5mg vs TNFi	contrast (CFB)	0.957	0.957	HR	0.968	0.598	0.3	3.124
APOC3	Tier 2	G.0	contrast (Group)	0.803	0.803	DeltaLog	-0.025	0.099	-0.222	0.173
APOC3	Tier 2	G.1	contrast (Group)	0.22	0.275	DeltaLog	0.133	0.107	-0.083	0.35
AT3	Tier 2	A.0.bl Overall, possible interaction	ANOVA	0.153	0.305	NA
AT3	Tier 2	A.1.bl Overall, no interaction	contrast (X)	0.125	0.305	HR	0.778	0.164	0.564	1.072
AT3	Tier 2	A.1.bl Tofacitinib 10mg	contrast (X)	0.51	0.759	HR	0.883	0.189	0.61	1.279
AT3	Tier 2	A.1.bl Tofacitinib 5mg	contrast (X)	0.346	0.476	HR	0.616	0.515	0.225	1.688
AT3	Tier 2	A.1.bl TNFi	contrast (X)	0.241	0.663	HR	0.624	0.403	0.283	1.373
AT3	Tier 2	A.0.12m Overall, possible interaction	ANOVA	0.911	0.945	NA
AT3	Tier 2	A.1.12m Overall, no interaction	contrast (X)	0.731	0.779	HR	1.052	0.148	0.787	1.407
AT3	Tier 2	A.1.12m Tofacitinib 10mg	contrast (X)	0.946	0.946	HR	0.983	0.257	0.594	1.626
AT3	Tier 2	A.1.12m Tofacitinib 5mg	contrast (X)	0.488	0.671	HR	1.185	0.245	0.733	1.915
AT3	Tier 2	A.1.12m TNFi	contrast (X)	0.982	0.982	HR	1.006	0.265	0.598	1.691
AT3	Tier 2	B.0.bl Overall	interaction	0.444	0.611	NA
AT3	Tier 2	B.1.bl Tofacitinib 10mg vs TNFi	contrast (X)	0.435	0.828	HR	1.416	0.445	0.592	3.384
AT3	Tier 2	B.1.bl Tofacitinib 5mg vs TNFi	contrast (X)	0.984	0.984	HR	0.987	0.653	0.274	3.551
AT3	Tier 2	B.0.12m Overall	interaction	0.823	0.982	NA
AT3	Tier 2	B.1.12m Tofacitinib 10mg vs TNFi	contrast (X)	0.949	0.968	HR	0.977	0.368	0.475	2.011
AT3	Tier 2	B.1.12m Tofacitinib 5mg vs TNFi	contrast (X)	0.647	0.954	HR	1.178	0.358	0.584	2.374
AT3	Tier 2	C.0 Overall	ANOVA	0.000946	0.01	NA
AT3	Tier 2	C.1.all Tofacitinib 10mg vs TNFi	contrast (Arm)	0.027	0.149	DeltaLog	-0.065	0.029	-0.122	-0.007
AT3	Tier 2	C.1.all Tofacitinib 5mg vs TNFi	contrast (Arm)	0.111	0.305	DeltaLog	0.054	0.034	-0.012	0.12
AT3	Tier 2	C.2.ctrl Tofacitinib 10mg vs TNFi	contrast (Arm)	0.025	0.136	DeltaLog	-0.073	0.033	-0.138	-0.009
AT3	Tier 2	C.2.ctrl Tofacitinib 5mg vs TNFi	contrast (Arm)	0.14	0.318	DeltaLog	0.056	0.038	-0.018	0.13
AT3	Tier 2	C.3.case Tofacitinib 10mg vs TNFi	contrast (Arm)	0.669	0.936	DeltaLog	-0.028	0.066	-0.158	0.102
AT3	Tier 2	C.3.case Tofacitinib 5mg vs TNFi	contrast (Arm)	0.531	0.913	DeltaLog	0.048	0.077	-0.102	0.198
AT3	Tier 2	D.0 Overall	ANOVA	0.982	0.982	NA
AT3	Tier 2	D.1.all Tofacitinib 10mg vs TNFi	contrast (Arm)	0.782	0.86	DeltaLog	0.01	0.035	-0.058	0.077
AT3	Tier 2	D.1.all Tofacitinib 5mg vs TNFi	contrast (Arm)	0.523	0.639	DeltaLog	0.025	0.04	-0.053	0.104
AT3	Tier 2	D.2.ctrl Tofacitinib 10mg vs TNFi	contrast (Arm)	0.799	0.799	DeltaLog	0.009	0.037	-0.064	0.083
AT3	Tier 2	D.2.ctrl Tofacitinib 5mg vs TNFi	contrast (Arm)	0.577	0.577	DeltaLog	0.024	0.043	-0.06	0.108
AT3	Tier 2	D.3.case Tofacitinib 10mg vs TNFi	contrast (Arm)	0.91	0.934	DeltaLog	0.011	0.094	-0.174	0.195
AT3	Tier 2	D.3.case Tofacitinib 5mg vs TNFi	contrast (Arm)	0.776	0.776	DeltaLog	0.031	0.109	-0.182	0.244
AT3	Tier 2	E.0 Overall	ANOVA	0.816	0.881	NA
AT3	Tier 2	E.1 Tofacitinib 10mg	contrast (CFB)	0.67	0.855	HR	1.114	0.254	0.677	1.833
AT3	Tier 2	E.1 Tofacitinib 5mg	contrast (CFB)	0.379	0.695	HR	1.21	0.217	0.791	1.85
AT3	Tier 2	E.1 TNFi	contrast (CFB)	0.78	0.997	HR	1.079	0.273	0.632	1.841
AT3	Tier 2	F.0 Overall	interaction	0.952	0.979	NA
AT3	Tier 2	F.1 Tofacitinib 10mg vs TNFi	contrast (CFB)	0.931	0.931	HR	1.033	0.371	0.499	2.138
AT3	Tier 2	F.1 Tofacitinib 5mg vs TNFi	contrast (CFB)	0.741	0.957	HR	1.121	0.346	0.569	2.208
AT3	Tier 2	G.0	contrast (Group)	0.173	0.347	DeltaLog	-0.059	0.043	-0.144	0.027
AT3	Tier 2	G.1	contrast (Group)	0.171	0.244	DeltaLog	0.084	0.06	-0.038	0.206
FAC8	Tier 2	A.0.bl Overall, possible interaction	ANOVA	0.223	0.305	NA
FAC8	Tier 2	A.1.bl Overall, no interaction	contrast (X)	0.319	0.585	HR	1.132	0.125	0.887	1.445
FAC8	Tier 2	A.1.bl Tofacitinib 10mg	contrast (X)	0.224	0.615	HR	1.226	0.168	0.883	1.703
FAC8	Tier 2	A.1.bl Tofacitinib 5mg	contrast (X)	0.221	0.476	HR	0.766	0.218	0.5	1.174
FAC8	Tier 2	A.1.bl TNFi	contrast (X)	0.17	0.625	HR	1.446	0.269	0.853	2.451
FAC8	Tier 2	A.0.12m Overall, possible interaction	ANOVA	0.817	0.945	NA
FAC8	Tier 2	A.1.12m Overall, no interaction	contrast (X)	0.763	0.779	HR	0.958	0.142	0.725	1.265
FAC8	Tier 2	A.1.12m Tofacitinib 10mg	contrast (X)	0.688	0.84	HR	1.097	0.23	0.699	1.721
FAC8	Tier 2	A.1.12m Tofacitinib 5mg	contrast (X)	0.197	0.542	HR	0.772	0.201	0.521	1.144
FAC8	Tier 2	A.1.12m TNFi	contrast (X)	0.762	0.982	HR	0.943	0.193	0.647	1.376
FAC8	Tier 2	B.0.bl Overall	interaction	0.188	0.518	NA
FAC8	Tier 2	B.1.bl Tofacitinib 10mg vs TNFi	contrast (X)	0.603	0.828	HR	0.848	0.317	0.455	1.579
FAC8	Tier 2	B.1.bl Tofacitinib 5mg vs TNFi	contrast (X)	0.067	0.252	HR	0.529	0.347	0.268	1.045
FAC8	Tier 2	B.0.12m Overall	interaction	0.649	0.982	NA
FAC8	Tier 2	B.1.12m Tofacitinib 10mg vs TNFi	contrast (X)	0.613	0.947	HR	1.163	0.298	0.649	2.084
FAC8	Tier 2	B.1.12m Tofacitinib 5mg vs TNFi	contrast (X)	0.471	0.954	HR	0.819	0.278	0.475	1.412
FAC8	Tier 2	C.0 Overall	ANOVA	0.075	0.207	NA
FAC8	Tier 2	C.1.all Tofacitinib 10mg vs TNFi	contrast (Arm)	0.052	0.19	DeltaLog	0.188	0.097	-0.002	0.378
FAC8	Tier 2	C.1.all Tofacitinib 5mg vs TNFi	contrast (Arm)	0.825	0.825	DeltaLog	-0.025	0.111	-0.243	0.194
FAC8	Tier 2	C.2.ctrl Tofacitinib 10mg vs TNFi	contrast (Arm)	0.054	0.197	DeltaLog	0.209	0.108	-0.003	0.421
FAC8	Tier 2	C.2.ctrl Tofacitinib 5mg vs TNFi	contrast (Arm)	0.722	0.794	DeltaLog	0.044	0.124	-0.2	0.288
FAC8	Tier 2	C.3.case Tofacitinib 10mg vs TNFi	contrast (Arm)	0.616	0.936	DeltaLog	0.109	0.218	-0.318	0.536
FAC8	Tier 2	C.3.case Tofacitinib 5mg vs TNFi	contrast (Arm)	0.227	0.834	DeltaLog	-0.302	0.25	-0.791	0.188
FAC8	Tier 2	D.0 Overall	ANOVA	2.18e-05	0.00012	NA
FAC8	Tier 2	D.1.all Tofacitinib 10mg vs TNFi	contrast (Arm)	2.03e-06	1.12e-05	DeltaLog	-0.284	0.06	-0.402	-0.167
FAC8	Tier 2	D.1.all Tofacitinib 5mg vs TNFi	contrast (Arm)	0.187	0.343	DeltaLog	-0.09	0.069	-0.225	0.044
FAC8	Tier 2	D.2.ctrl Tofacitinib 10mg vs TNFi	contrast (Arm)	3.31e-06	1.82e-05	DeltaLog	-0.301	0.065	-0.428	-0.174
FAC8	Tier 2	D.2.ctrl Tofacitinib 5mg vs TNFi	contrast (Arm)	0.226	0.303	DeltaLog	-0.09	0.074	-0.235	0.055
FAC8	Tier 2	D.3.case Tofacitinib 10mg vs TNFi	contrast (Arm)	0.263	0.58	DeltaLog	-0.18	0.161	-0.496	0.136
FAC8	Tier 2	D.3.case Tofacitinib 5mg vs TNFi	contrast (Arm)	0.616	0.776	DeltaLog	-0.093	0.186	-0.458	0.271
FAC8	Tier 2	E.0 Overall	ANOVA	0.795	0.881	NA
FAC8	Tier 2	E.1 Tofacitinib 10mg	contrast (CFB)	0.855	0.855	HR	1.089	0.464	0.439	2.703
FAC8	Tier 2	E.1 Tofacitinib 5mg	contrast (CFB)	0.532	0.721	HR	0.736	0.49	0.282	1.925
FAC8	Tier 2	E.1 TNFi	contrast (CFB)	0.373	0.931	HR	0.627	0.524	0.225	1.752
FAC8	Tier 2	F.0 Overall	interaction	0.702	0.89	NA
FAC8	Tier 2	F.1 Tofacitinib 10mg vs TNFi	contrast (CFB)	0.438	0.802	HR	1.736	0.71	0.431	6.987
FAC8	Tier 2	F.1 Tofacitinib 5mg vs TNFi	contrast (CFB)	0.824	0.957	HR	1.174	0.72	0.286	4.813
FAC8	Tier 2	G.0	contrast (Group)	0.107	0.272	DeltaLog	0.211	0.129	-0.047	0.469
FAC8	Tier 2	G.1	contrast (Group)	0.061	0.144	DeltaLog	-0.197	0.101	-0.403	0.009
LEPTIN	Tier 2	A.0.bl Overall, possible interaction	ANOVA	0.000255	0.003	NA
LEPTIN	Tier 2	A.1.bl Overall, no interaction	contrast (X)	0.001	0.016	HR	1.766	0.178	1.245	2.504
LEPTIN	Tier 2	A.1.bl Tofacitinib 10mg	contrast (X)	0.035	0.238	HR	1.5	0.192	1.029	2.187
LEPTIN	Tier 2	A.1.bl Tofacitinib 5mg	contrast (X)	0.09	0.339	HR	2.064	0.427	0.893	4.77
LEPTIN	Tier 2	A.1.bl TNFi	contrast (X)	0.062	0.448	HR	2.495	0.489	0.956	6.508
LEPTIN	Tier 2	A.0.12m Overall, possible interaction	ANOVA	0.004	0.023	NA
LEPTIN	Tier 2	A.1.12m Overall, no interaction	contrast (X)	0.02	0.11	HR	1.568	0.193	1.074	2.29
LEPTIN	Tier 2	A.1.12m Tofacitinib 10mg	contrast (X)	0.607	0.84	HR	1.123	0.226	0.721	1.75
LEPTIN	Tier 2	A.1.12m Tofacitinib 5mg	contrast (X)	0.022	0.24	HR	2.986	0.477	1.172	7.608
LEPTIN	Tier 2	A.1.12m TNFi	contrast (X)	0.045	0.495	HR	2.431	0.443	1.02	5.794
LEPTIN	Tier 2	B.0.bl Overall	interaction	0.357	0.611	NA
LEPTIN	Tier 2	B.1.bl Tofacitinib 10mg vs TNFi	contrast (X)	0.332	0.828	HR	0.601	0.524	0.215	1.679
LEPTIN	Tier 2	B.1.bl Tofacitinib 5mg vs TNFi	contrast (X)	0.77	0.872	HR	0.827	0.649	0.232	2.953
LEPTIN	Tier 2	B.0.12m Overall	interaction	0.045	0.48	NA
LEPTIN	Tier 2	B.1.12m Tofacitinib 10mg vs TNFi	contrast (X)	0.12	0.33	HR	0.462	0.496	0.175	1.223
LEPTIN	Tier 2	B.1.12m Tofacitinib 5mg vs TNFi	contrast (X)	0.751	0.954	HR	1.228	0.647	0.346	4.363
LEPTIN	Tier 2	C.0 Overall	ANOVA	0.507	0.745	NA
LEPTIN	Tier 2	C.1.all Tofacitinib 10mg vs TNFi	contrast (Arm)	0.12	0.265	DeltaLog	-0.274	0.176	-0.619	0.072
LEPTIN	Tier 2	C.1.all Tofacitinib 5mg vs TNFi	contrast (Arm)	0.491	0.6	DeltaLog	-0.14	0.204	-0.54	0.259
LEPTIN	Tier 2	C.2.ctrl Tofacitinib 10mg vs TNFi	contrast (Arm)	0.265	0.584	DeltaLog	-0.216	0.194	-0.595	0.164
LEPTIN	Tier 2	C.2.ctrl Tofacitinib 5mg vs TNFi	contrast (Arm)	0.595	0.727	DeltaLog	-0.119	0.224	-0.557	0.319
LEPTIN	Tier 2	C.3.case Tofacitinib 10mg vs TNFi	contrast (Arm)	0.168	0.725	DeltaLog	-0.54	0.391	-1.306	0.227
LEPTIN	Tier 2	C.3.case Tofacitinib 5mg vs TNFi	contrast (Arm)	0.596	0.913	DeltaLog	-0.24	0.453	-1.129	0.648
LEPTIN	Tier 2	D.0 Overall	ANOVA	0.132	0.242	NA
LEPTIN	Tier 2	D.1.all Tofacitinib 10mg vs TNFi	contrast (Arm)	0.03	0.065	DeltaLog	0.214	0.098	0.021	0.407
LEPTIN	Tier 2	D.1.all Tofacitinib 5mg vs TNFi	contrast (Arm)	0.027	0.099	DeltaLog	0.25	0.113	0.028	0.471
LEPTIN	Tier 2	D.2.ctrl Tofacitinib 10mg vs TNFi	contrast (Arm)	0.036	0.112	DeltaLog	0.222	0.106	0.015	0.429
LEPTIN	Tier 2	D.2.ctrl Tofacitinib 5mg vs TNFi	contrast (Arm)	0.073	0.233	DeltaLog	0.218	0.122	-0.021	0.457
LEPTIN	Tier 2	D.3.case Tofacitinib 10mg vs TNFi	contrast (Arm)	0.573	0.9	DeltaLog	0.153	0.272	-0.379	0.686
LEPTIN	Tier 2	D.3.case Tofacitinib 5mg vs TNFi	contrast (Arm)	0.152	0.334	DeltaLog	0.446	0.311	-0.164	1.057
LEPTIN	Tier 2	E.0 Overall	ANOVA	0.644	0.881	NA
LEPTIN	Tier 2	E.1 Tofacitinib 10mg	contrast (CFB)	0.452	0.855	HR	0.694	0.485	0.269	1.795
LEPTIN	Tier 2	E.1 Tofacitinib 5mg	contrast (CFB)	0.287	0.695	HR	1.881	0.593	0.588	6.012
LEPTIN	Tier 2	E.1 TNFi	contrast (CFB)	0.984	0.997	HR	0.982	0.897	0.169	5.695
LEPTIN	Tier 2	F.0 Overall	interaction	0.436	0.89	NA
LEPTIN	Tier 2	F.1 Tofacitinib 10mg vs TNFi	contrast (CFB)	0.732	0.898	HR	0.707	1.011	0.098	5.126
LEPTIN	Tier 2	F.1 Tofacitinib 5mg vs TNFi	contrast (CFB)	0.544	0.957	HR	1.915	1.07	0.235	15.588
LEPTIN	Tier 2	G.0	contrast (Group)	0.109	0.272	DeltaLog	0.363	0.223	-0.083	0.808
LEPTIN	Tier 2	G.1	contrast (Group)	0.1	0.167	DeltaLog	0.356	0.211	-0.072	0.784
PAI1	Tier 2	A.0.bl Overall, possible interaction	ANOVA	0.152	0.305	NA
PAI1	Tier 2	A.1.bl Overall, no interaction	contrast (X)	0.806	0.886	HR	1.044	0.177	0.738	1.478
PAI1	Tier 2	A.1.bl Tofacitinib 10mg	contrast (X)	0.735	0.809	HR	0.915	0.264	0.545	1.534
PAI1	Tier 2	A.1.bl Tofacitinib 5mg	contrast (X)	0.086	0.339	HR	2.167	0.451	0.896	5.244
PAI1	Tier 2	A.1.bl TNFi	contrast (X)	0.752	0.834	HR	0.937	0.205	0.628	1.4
PAI1	Tier 2	A.0.12m Overall, possible interaction	ANOVA	0.756	0.945	NA
PAI1	Tier 2	A.1.12m Overall, no interaction	contrast (X)	0.691	0.779	HR	1.098	0.234	0.694	1.736
PAI1	Tier 2	A.1.12m Tofacitinib 10mg	contrast (X)	0.879	0.946	HR	0.955	0.303	0.527	1.729
PAI1	Tier 2	A.1.12m Tofacitinib 5mg	contrast (X)	0.729	0.753	HR	1.3	0.756	0.295	5.718
PAI1	Tier 2	A.1.12m TNFi	contrast (X)	0.307	0.982	HR	1.379	0.314	0.745	2.552
PAI1	Tier 2	B.0.bl Overall	interaction	0.075	0.414	NA
PAI1	Tier 2	B.1.bl Tofacitinib 10mg vs TNFi	contrast (X)	0.941	0.941	HR	0.976	0.331	0.509	1.868
PAI1	Tier 2	B.1.bl Tofacitinib 5mg vs TNFi	contrast (X)	0.091	0.252	HR	2.312	0.497	0.874	6.119
PAI1	Tier 2	B.0.12m Overall	interaction	0.635	0.982	NA
PAI1	Tier 2	B.1.12m Tofacitinib 10mg vs TNFi	contrast (X)	0.402	0.737	HR	0.693	0.438	0.294	1.634
PAI1	Tier 2	B.1.12m Tofacitinib 5mg vs TNFi	contrast (X)	0.943	0.954	HR	0.943	0.818	0.19	4.681
PAI1	Tier 2	C.0 Overall	ANOVA	0.629	0.746	NA
PAI1	Tier 2	C.1.all Tofacitinib 10mg vs TNFi	contrast (Arm)	0.855	0.855	DeltaLog	-0.019	0.106	-0.228	0.189
PAI1	Tier 2	C.1.all Tofacitinib 5mg vs TNFi	contrast (Arm)	0.445	0.6	DeltaLog	-0.094	0.123	-0.334	0.147
PAI1	Tier 2	C.2.ctrl Tofacitinib 10mg vs TNFi	contrast (Arm)	0.86	0.883	DeltaLog	-0.021	0.119	-0.254	0.212
PAI1	Tier 2	C.2.ctrl Tofacitinib 5mg vs TNFi	contrast (Arm)	0.236	0.371	DeltaLog	-0.162	0.137	-0.431	0.106
PAI1	Tier 2	C.3.case Tofacitinib 10mg vs TNFi	contrast (Arm)	0.962	0.963	DeltaLog	-0.012	0.241	-0.484	0.461
PAI1	Tier 2	C.3.case Tofacitinib 5mg vs TNFi	contrast (Arm)	0.503	0.913	DeltaLog	0.186	0.278	-0.359	0.731
PAI1	Tier 2	D.0 Overall	ANOVA	0.365	0.536	NA
PAI1	Tier 2	D.1.all Tofacitinib 10mg vs TNFi	contrast (Arm)	0.277	0.435	DeltaLog	0.096	0.088	-0.077	0.268
PAI1	Tier 2	D.1.all Tofacitinib 5mg vs TNFi	contrast (Arm)	0.045	0.124	DeltaLog	0.204	0.102	0.005	0.404
PAI1	Tier 2	D.2.ctrl Tofacitinib 10mg vs TNFi	contrast (Arm)	0.231	0.363	DeltaLog	0.114	0.095	-0.072	0.3
PAI1	Tier 2	D.2.ctrl Tofacitinib 5mg vs TNFi	contrast (Arm)	0.042	0.233	DeltaLog	0.224	0.11	0.008	0.44
PAI1	Tier 2	D.3.case Tofacitinib 10mg vs TNFi	contrast (Arm)	0.934	0.934	DeltaLog	-0.02	0.242	-0.493	0.453
PAI1	Tier 2	D.3.case Tofacitinib 5mg vs TNFi	contrast (Arm)	0.771	0.776	DeltaLog	0.081	0.278	-0.465	0.627
PAI1	Tier 2	E.0 Overall	ANOVA	0.866	0.881	NA
PAI1	Tier 2	E.1 Tofacitinib 10mg	contrast (CFB)	0.781	0.855	HR	0.91	0.339	0.469	1.768
PAI1	Tier 2	E.1 Tofacitinib 5mg	contrast (CFB)	0.948	0.948	HR	0.952	0.764	0.213	4.255
PAI1	Tier 2	E.1 TNFi	contrast (CFB)	0.436	0.931	HR	1.366	0.4	0.624	2.991
PAI1	Tier 2	F.0 Overall	interaction	0.697	0.89	NA
PAI1	Tier 2	F.1 Tofacitinib 10mg vs TNFi	contrast (CFB)	0.436	0.802	HR	0.666	0.521	0.24	1.849
PAI1	Tier 2	F.1 Tofacitinib 5mg vs TNFi	contrast (CFB)	0.675	0.957	HR	0.697	0.861	0.129	3.767
PAI1	Tier 2	G.0	contrast (Group)	0.782	0.803	DeltaLog	-0.048	0.173	-0.393	0.298
PAI1	Tier 2	G.1	contrast (Group)	0.924	0.924	DeltaLog	-0.017	0.171	-0.364	0.331
PROT_C	Tier 2	A.0.bl Overall, possible interaction	ANOVA	0.051	0.281	NA
PROT_C	Tier 2	A.1.bl Overall, no interaction	contrast (X)	0.904	0.904	HR	1.019	0.157	0.75	1.386
PROT_C	Tier 2	A.1.bl Tofacitinib 10mg	contrast (X)	0.433	0.759	HR	1.168	0.198	0.792	1.721
PROT_C	Tier 2	A.1.bl Tofacitinib 5mg	contrast (X)	0.092	0.339	HR	0.478	0.439	0.202	1.129
PROT_C	Tier 2	A.1.bl TNFi	contrast (X)	0.365	0.668	HR	1.383	0.358	0.686	2.787
PROT_C	Tier 2	A.0.12m Overall, possible interaction	ANOVA	0.629	0.945	NA
PROT_C	Tier 2	A.1.12m Overall, no interaction	contrast (X)	0.779	0.779	HR	0.945	0.204	0.634	1.408
PROT_C	Tier 2	A.1.12m Tofacitinib 10mg	contrast (X)	0.684	0.84	HR	1.106	0.247	0.681	1.795
PROT_C	Tier 2	A.1.12m Tofacitinib 5mg	contrast (X)	0.629	0.753	HR	0.746	0.606	0.228	2.446
PROT_C	Tier 2	A.1.12m TNFi	contrast (X)	0.253	0.982	HR	0.718	0.29	0.406	1.268
PROT_C	Tier 2	B.0.bl Overall	interaction	0.021	0.229	NA
PROT_C	Tier 2	B.1.bl Tofacitinib 10mg vs TNFi	contrast (X)	0.678	0.828	HR	0.844	0.407	0.38	1.874
PROT_C	Tier 2	B.1.bl Tofacitinib 5mg vs TNFi	contrast (X)	0.062	0.252	HR	0.346	0.57	0.113	1.056
PROT_C	Tier 2	B.0.12m Overall	interaction	0.447	0.982	NA
PROT_C	Tier 2	B.1.12m Tofacitinib 10mg vs TNFi	contrast (X)	0.253	0.557	HR	1.54	0.378	0.734	3.23
PROT_C	Tier 2	B.1.12m Tofacitinib 5mg vs TNFi	contrast (X)	0.954	0.954	HR	1.04	0.674	0.278	3.892
PROT_C	Tier 2	C.0 Overall	ANOVA	0.063	0.207	NA
PROT_C	Tier 2	C.1.all Tofacitinib 10mg vs TNFi	contrast (Arm)	0.108	0.265	DeltaLog	0.115	0.072	-0.025	0.256
PROT_C	Tier 2	C.1.all Tofacitinib 5mg vs TNFi	contrast (Arm)	0.019	0.105	DeltaLog	0.193	0.082	0.032	0.355
PROT_C	Tier 2	C.2.ctrl Tofacitinib 10mg vs TNFi	contrast (Arm)	0.11	0.302	DeltaLog	0.128	0.08	-0.029	0.285
PROT_C	Tier 2	C.2.ctrl Tofacitinib 5mg vs TNFi	contrast (Arm)	0.005	0.05	DeltaLog	0.261	0.092	0.08	0.441
PROT_C	Tier 2	C.3.case Tofacitinib 10mg vs TNFi	contrast (Arm)	0.681	0.936	DeltaLog	0.066	0.161	-0.249	0.382
PROT_C	Tier 2	C.3.case Tofacitinib 5mg vs TNFi	contrast (Arm)	0.664	0.913	DeltaLog	-0.08	0.185	-0.442	0.282
PROT_C	Tier 2	D.0 Overall	ANOVA	0.105	0.238	NA
PROT_C	Tier 2	D.1.all Tofacitinib 10mg vs TNFi	contrast (Arm)	0.096	0.176	DeltaLog	-0.067	0.04	-0.146	0.012
PROT_C	Tier 2	D.1.all Tofacitinib 5mg vs TNFi	contrast (Arm)	0.89	0.89	DeltaLog	-0.006	0.047	-0.098	0.085
PROT_C	Tier 2	D.2.ctrl Tofacitinib 10mg vs TNFi	contrast (Arm)	0.057	0.126	DeltaLog	-0.082	0.043	-0.167	0.003
PROT_C	Tier 2	D.2.ctrl Tofacitinib 5mg vs TNFi	contrast (Arm)	0.403	0.443	DeltaLog	-0.042	0.05	-0.141	0.056
PROT_C	Tier 2	D.3.case Tofacitinib 10mg vs TNFi	contrast (Arm)	0.817	0.934	DeltaLog	0.025	0.108	-0.187	0.237
PROT_C	Tier 2	D.3.case Tofacitinib 5mg vs TNFi	contrast (Arm)	0.09	0.334	DeltaLog	0.211	0.124	-0.033	0.454
PROT_C	Tier 2	E.0 Overall	ANOVA	0.083	0.306	NA
PROT_C	Tier 2	E.1 Tofacitinib 10mg	contrast (CFB)	0.808	0.855	HR	0.909	0.392	0.422	1.96
PROT_C	Tier 2	E.1 Tofacitinib 5mg	contrast (CFB)	0.238	0.695	HR	4.201	1.217	0.387	45.633
PROT_C	Tier 2	E.1 TNFi	contrast (CFB)	0.055	0.61	HR	0.429	0.442	0.18	1.02
PROT_C	Tier 2	F.0 Overall	interaction	0.036	0.197	NA
PROT_C	Tier 2	F.1 Tofacitinib 10mg vs TNFi	contrast (CFB)	0.215	0.592	HR	2.122	0.607	0.646	6.973
PROT_C	Tier 2	F.1 Tofacitinib 5mg vs TNFi	contrast (CFB)	0.08	0.437	HR	9.803	1.302	0.764	125.746
PROT_C	Tier 2	G.0	contrast (Group)	0.315	0.45	DeltaLog	0.093	0.091	-0.09	0.275
PROT_C	Tier 2	G.1	contrast (Group)	0.742	0.824	DeltaLog	0.019	0.057	-0.098	0.136
TAT	Tier 2	A.0.bl Overall, possible interaction	ANOVA	0.25	0.305	NA
TAT	Tier 2	A.1.bl Overall, no interaction	contrast (X)	0.701	0.886	HR	1.05	0.127	0.819	1.346
TAT	Tier 2	A.1.bl Tofacitinib 10mg	contrast (X)	0.454	0.759	HR	1.115	0.145	0.839	1.481
TAT	Tier 2	A.1.bl Tofacitinib 5mg	contrast (X)	0.126	0.346	HR	0.573	0.363	0.281	1.168
TAT	Tier 2	A.1.bl TNFi	contrast (X)	0.356	0.668	HR	1.345	0.321	0.717	2.525
TAT	Tier 2	A.0.12m Overall, possible interaction	ANOVA	0.096	0.263	NA
TAT	Tier 2	A.1.12m Overall, no interaction	contrast (X)	0.124	0.341	HR	1.344	0.192	0.922	1.959
TAT	Tier 2	A.1.12m Tofacitinib 10mg	contrast (X)	0.064	0.235	HR	1.624	0.262	0.972	2.712
TAT	Tier 2	A.1.12m Tofacitinib 5mg	contrast (X)	0.185	0.542	HR	1.535	0.323	0.815	2.891
TAT	Tier 2	A.1.12m TNFi	contrast (X)	0.397	0.982	HR	0.667	0.478	0.262	1.701
TAT	Tier 2	B.0.bl Overall	interaction	0.139	0.509	NA
TAT	Tier 2	B.1.bl Tofacitinib 10mg vs TNFi	contrast (X)	0.594	0.828	HR	0.829	0.353	0.415	1.654
TAT	Tier 2	B.1.bl Tofacitinib 5mg vs TNFi	contrast (X)	0.079	0.252	HR	0.426	0.486	0.165	1.104
TAT	Tier 2	B.0.12m Overall	interaction	0.165	0.48	NA
TAT	Tier 2	B.1.12m Tofacitinib 10mg vs TNFi	contrast (X)	0.101	0.33	HR	2.434	0.542	0.841	7.046
TAT	Tier 2	B.1.12m Tofacitinib 5mg vs TNFi	contrast (X)	0.145	0.798	HR	2.3	0.572	0.75	7.052
TAT	Tier 2	C.0 Overall	ANOVA	0.542	0.745	NA
TAT	Tier 2	C.1.all Tofacitinib 10mg vs TNFi	contrast (Arm)	0.78	0.855	DeltaLog	0.047	0.17	-0.286	0.381
TAT	Tier 2	C.1.all Tofacitinib 5mg vs TNFi	contrast (Arm)	0.575	0.632	DeltaLog	-0.11	0.196	-0.495	0.275
TAT	Tier 2	C.2.ctrl Tofacitinib 10mg vs TNFi	contrast (Arm)	0.672	0.883	DeltaLog	0.08	0.19	-0.292	0.452
TAT	Tier 2	C.2.ctrl Tofacitinib 5mg vs TNFi	contrast (Arm)	0.912	0.912	DeltaLog	0.024	0.219	-0.405	0.454
TAT	Tier 2	C.3.case Tofacitinib 10mg vs TNFi	contrast (Arm)	0.809	0.963	DeltaLog	-0.093	0.385	-0.848	0.662
TAT	Tier 2	C.3.case Tofacitinib 5mg vs TNFi	contrast (Arm)	0.136	0.746	DeltaLog	-0.663	0.445	-1.535	0.208
TAT	Tier 2	D.0 Overall	ANOVA	0.472	0.576	NA
TAT	Tier 2	D.1.all Tofacitinib 10mg vs TNFi	contrast (Arm)	0.94	0.94	DeltaLog	-0.01	0.138	-0.281	0.26
TAT	Tier 2	D.1.all Tofacitinib 5mg vs TNFi	contrast (Arm)	0.351	0.482	DeltaLog	-0.15	0.16	-0.464	0.165
TAT	Tier 2	D.2.ctrl Tofacitinib 10mg vs TNFi	contrast (Arm)	0.526	0.578	DeltaLog	-0.094	0.148	-0.384	0.196
TAT	Tier 2	D.2.ctrl Tofacitinib 5mg vs TNFi	contrast (Arm)	0.209	0.303	DeltaLog	-0.216	0.172	-0.553	0.121
TAT	Tier 2	D.3.case Tofacitinib 10mg vs TNFi	contrast (Arm)	0.171	0.54	DeltaLog	0.516	0.377	-0.222	1.255
TAT	Tier 2	D.3.case Tofacitinib 5mg vs TNFi	contrast (Arm)	0.533	0.776	DeltaLog	0.271	0.436	-0.583	1.126
TAT	Tier 2	E.0 Overall	ANOVA	0.005	0.027	NA
TAT	Tier 2	E.1 Tofacitinib 10mg	contrast (CFB)	0.054	0.295	HR	1.662	0.263	0.992	2.783
TAT	Tier 2	E.1 Tofacitinib 5mg	contrast (CFB)	0.072	0.695	HR	5.674	0.965	0.856	37.612
TAT	Tier 2	E.1 TNFi	contrast (CFB)	0.312	0.931	HR	0.645	0.434	0.276	1.509
TAT	Tier 2	F.0 Overall	interaction	0.012	0.127	NA
TAT	Tier 2	F.1 Tofacitinib 10mg vs TNFi	contrast (CFB)	0.062	0.392	HR	2.577	0.508	0.952	6.977
TAT	Tier 2	F.1 Tofacitinib 5mg vs TNFi	contrast (CFB)	0.04	0.437	HR	8.8	1.059	1.104	70.128
TAT	Tier 2	G.0	contrast (Group)	0.071	0.272	DeltaLog	0.401	0.218	-0.036	0.838
TAT	Tier 2	G.1	contrast (Group)	0.045	0.144	DeltaLog	0.586	0.282	0.012	1.16
TFPI	Tier 2	A.0.bl Overall, possible interaction	ANOVA	0.475	0.523	NA
TFPI	Tier 2	A.1.bl Overall, no interaction	contrast (X)	0.605	0.886	HR	0.883	0.24	0.551	1.414
TFPI	Tier 2	A.1.bl Tofacitinib 10mg	contrast (X)	0.625	0.764	HR	0.829	0.384	0.391	1.759
TFPI	Tier 2	A.1.bl Tofacitinib 5mg	contrast (X)	0.411	0.502	HR	0.719	0.401	0.328	1.577
TFPI	Tier 2	A.1.bl TNFi	contrast (X)	0.473	0.743	HR	1.149	0.193	0.787	1.677
TFPI	Tier 2	A.0.12m Overall, possible interaction	ANOVA	0.706	0.945	NA
TFPI	Tier 2	A.1.12m Overall, no interaction	contrast (X)	0.327	0.6	HR	1.218	0.201	0.821	1.808
TFPI	Tier 2	A.1.12m Tofacitinib 10mg	contrast (X)	0.523	0.84	HR	1.221	0.313	0.662	2.254
TFPI	Tier 2	A.1.12m Tofacitinib 5mg	contrast (X)	0.372	0.671	HR	1.303	0.297	0.729	2.331
TFPI	Tier 2	A.1.12m TNFi	contrast (X)	0.855	0.982	HR	1.08	0.42	0.474	2.457
TFPI	Tier 2	B.0.bl Overall	interaction	0.425	0.611	NA
TFPI	Tier 2	B.1.bl Tofacitinib 10mg vs TNFi	contrast (X)	0.452	0.828	HR	0.722	0.433	0.309	1.687
TFPI	Tier 2	B.1.bl Tofacitinib 5mg vs TNFi	contrast (X)	0.291	0.641	HR	0.626	0.444	0.262	1.494
TFPI	Tier 2	B.0.12m Overall	interaction	0.938	0.982	NA
TFPI	Tier 2	B.1.12m Tofacitinib 10mg vs TNFi	contrast (X)	0.814	0.968	HR	1.131	0.525	0.404	3.163
TFPI	Tier 2	B.1.12m Tofacitinib 5mg vs TNFi	contrast (X)	0.715	0.954	HR	1.207	0.515	0.44	3.314
TFPI	Tier 2	C.0 Overall	ANOVA	0.073	0.207	NA
TFPI	Tier 2	C.1.all Tofacitinib 10mg vs TNFi	contrast (Arm)	0.467	0.855	DeltaLog	-0.034	0.047	-0.127	0.058
TFPI	Tier 2	C.1.all Tofacitinib 5mg vs TNFi	contrast (Arm)	0.012	0.105	DeltaLog	-0.137	0.055	-0.244	-0.03
TFPI	Tier 2	C.2.ctrl Tofacitinib 10mg vs TNFi	contrast (Arm)	0.863	0.883	DeltaLog	-0.009	0.053	-0.113	0.095
TFPI	Tier 2	C.2.ctrl Tofacitinib 5mg vs TNFi	contrast (Arm)	0.078	0.318	DeltaLog	-0.108	0.061	-0.228	0.012
TFPI	Tier 2	C.3.case Tofacitinib 10mg vs TNFi	contrast (Arm)	0.198	0.725	DeltaLog	-0.138	0.107	-0.349	0.072
TFPI	Tier 2	C.3.case Tofacitinib 5mg vs TNFi	contrast (Arm)	0.039	0.424	DeltaLog	-0.256	0.124	-0.499	-0.013
TFPI	Tier 2	D.0 Overall	ANOVA	0.108	0.238	NA
TFPI	Tier 2	D.1.all Tofacitinib 10mg vs TNFi	contrast (Arm)	0.012	0.032	DeltaLog	0.087	0.035	0.02	0.155
TFPI	Tier 2	D.1.all Tofacitinib 5mg vs TNFi	contrast (Arm)	0.086	0.188	DeltaLog	0.07	0.041	-0.01	0.149
TFPI	Tier 2	D.2.ctrl Tofacitinib 10mg vs TNFi	contrast (Arm)	0.041	0.112	DeltaLog	0.076	0.037	0.003	0.149
TFPI	Tier 2	D.2.ctrl Tofacitinib 5mg vs TNFi	contrast (Arm)	0.229	0.303	DeltaLog	0.053	0.044	-0.033	0.138
TFPI	Tier 2	D.3.case Tofacitinib 10mg vs TNFi	contrast (Arm)	0.095	0.523	DeltaLog	0.158	0.095	-0.028	0.344
TFPI	Tier 2	D.3.case Tofacitinib 5mg vs TNFi	contrast (Arm)	0.102	0.334	DeltaLog	0.18	0.11	-0.035	0.395
TFPI	Tier 2	E.0 Overall	ANOVA	0.532	0.881	NA
TFPI	Tier 2	E.1 Tofacitinib 10mg	contrast (CFB)	0.484	0.855	HR	1.257	0.326	0.663	2.383
TFPI	Tier 2	E.1 Tofacitinib 5mg	contrast (CFB)	0.222	0.695	HR	1.779	0.472	0.706	4.484
TFPI	Tier 2	E.1 TNFi	contrast (CFB)	0.997	0.997	HR	0.998	0.596	0.311	3.207
TFPI	Tier 2	F.0 Overall	interaction	0.683	0.89	NA
TFPI	Tier 2	F.1 Tofacitinib 10mg vs TNFi	contrast (CFB)	0.735	0.898	HR	1.259	0.681	0.332	4.782
TFPI	Tier 2	F.1 Tofacitinib 5mg vs TNFi	contrast (CFB)	0.447	0.957	HR	1.783	0.76	0.402	7.907
TFPI	Tier 2	G.0	contrast (Group)	0.76	0.803	DeltaLog	-0.028	0.092	-0.212	0.155
TFPI	Tier 2	G.1	contrast (Group)	0.072	0.144	DeltaLog	0.098	0.053	-0.009	0.206
ADAM-TS13.Olink	Tier 3	A.0.bl Overall, possible interaction	ANOVA	0.016	0.14	NA
ADAM-TS13.Olink	Tier 3	A.1.bl Overall, no interaction	contrast (X)	0.946	0.946	HR	0.987	0.19	0.68	1.432
ADAM-TS13.Olink	Tier 3	A.1.bl Tofacitinib 10mg	contrast (X)	0.438	0.936	HR	1.163	0.195	0.794	1.703
ADAM-TS13.Olink	Tier 3	A.1.bl Tofacitinib 5mg	contrast (X)	0.788	0.932	HR	1.079	0.283	0.62	1.878
ADAM-TS13.Olink	Tier 3	A.1.bl TNFi	contrast (X)	0.022	0.358	HR	0.314	0.504	0.117	0.844
ADAM-TS13.Olink	Tier 3	A.0.12m Overall, possible interaction	ANOVA	0.155	0.399	NA
ADAM-TS13.Olink	Tier 3	A.1.12m Overall, no interaction	contrast (X)	0.589	0.906	HR	0.843	0.316	0.453	1.567
ADAM-TS13.Olink	Tier 3	A.1.12m Tofacitinib 10mg	contrast (X)	0.769	0.992	HR	0.854	0.536	0.299	2.443
ADAM-TS13.Olink	Tier 3	A.1.12m Tofacitinib 5mg	contrast (X)	0.497	0.875	HR	1.534	0.63	0.446	5.273
ADAM-TS13.Olink	Tier 3	A.1.12m TNFi	contrast (X)	0.054	0.371	HR	0.516	0.344	0.263	1.012
ADAM-TS13.Olink	Tier 3	B.0.bl Overall	interaction	0.006	0.322	NA
ADAM-TS13.Olink	Tier 3	B.1.bl Tofacitinib 10mg vs TNFi	contrast (X)	0.015	0.545	HR	3.699	0.538	1.287	10.625
ADAM-TS13.Olink	Tier 3	B.1.bl Tofacitinib 5mg vs TNFi	contrast (X)	0.033	0.433	HR	3.432	0.577	1.107	10.643
ADAM-TS13.Olink	Tier 3	B.0.12m Overall	interaction	0.112	0.475	NA
ADAM-TS13.Olink	Tier 3	B.1.12m Tofacitinib 10mg vs TNFi	contrast (X)	0.425	0.924	HR	1.656	0.633	0.479	5.72
ADAM-TS13.Olink	Tier 3	B.1.12m Tofacitinib 5mg vs TNFi	contrast (X)	0.127	0.522	HR	2.973	0.714	0.733	12.052
ADAM-TS13.Olink	Tier 3	C.0 Overall	ANOVA	0.217	0.618	NA
ADAM-TS13.Olink	Tier 3	C.1.all Tofacitinib 10mg vs TNFi	contrast (Arm)	0.456	0.899	DeltaLog	-0.027	0.037	-0.1	0.045
ADAM-TS13.Olink	Tier 3	C.1.all Tofacitinib 5mg vs TNFi	contrast (Arm)	0.538	0.73	DeltaLog	-0.026	0.042	-0.108	0.057
ADAM-TS13.Olink	Tier 3	C.2.ctrl Tofacitinib 10mg vs TNFi	contrast (Arm)	0.094	0.659	DeltaLog	-0.069	0.041	-0.149	0.012
ADAM-TS13.Olink	Tier 3	C.2.ctrl Tofacitinib 5mg vs TNFi	contrast (Arm)	0.192	0.532	DeltaLog	-0.061	0.047	-0.153	0.031
ADAM-TS13.Olink	Tier 3	C.3.case Tofacitinib 10mg vs TNFi	contrast (Arm)	0.096	0.547	DeltaLog	0.136	0.082	-0.024	0.296
ADAM-TS13.Olink	Tier 3	C.3.case Tofacitinib 5mg vs TNFi	contrast (Arm)	0.218	0.789	DeltaLog	0.115	0.093	-0.068	0.297
ADAM-TS13.Olink	Tier 3	D.0 Overall	ANOVA	0.142	0.394	NA
ADAM-TS13.Olink	Tier 3	D.1.all Tofacitinib 10mg vs TNFi	contrast (Arm)	0.078	0.195	DeltaLog	0.053	0.03	-0.006	0.113
ADAM-TS13.Olink	Tier 3	D.1.all Tofacitinib 5mg vs TNFi	contrast (Arm)	0.075	0.298	DeltaLog	0.061	0.034	-0.006	0.128
ADAM-TS13.Olink	Tier 3	D.2.ctrl Tofacitinib 10mg vs TNFi	contrast (Arm)	0.141	0.308	DeltaLog	0.048	0.033	-0.016	0.112
ADAM-TS13.Olink	Tier 3	D.2.ctrl Tofacitinib 5mg vs TNFi	contrast (Arm)	0.282	0.635	DeltaLog	0.04	0.037	-0.033	0.112
ADAM-TS13.Olink	Tier 3	D.3.case Tofacitinib 10mg vs TNFi	contrast (Arm)	0.223	0.892	DeltaLog	0.105	0.086	-0.064	0.275
ADAM-TS13.Olink	Tier 3	D.3.case Tofacitinib 5mg vs TNFi	contrast (Arm)	0.033	0.4	DeltaLog	0.205	0.096	0.016	0.394
ADAM-TS13.Olink	Tier 3	E.0 Overall	ANOVA	0.332	0.724	NA
ADAM-TS13.Olink	Tier 3	E.1 Tofacitinib 10mg	contrast (CFB)	0.663	0.944	HR	0.785	0.556	0.264	2.335
ADAM-TS13.Olink	Tier 3	E.1 Tofacitinib 5mg	contrast (CFB)	0.305	0.981	HR	2.031	0.691	0.524	7.872
ADAM-TS13.Olink	Tier 3	E.1 TNFi	contrast (CFB)	0.451	0.89	HR	0.708	0.458	0.289	1.736
ADAM-TS13.Olink	Tier 3	F.0 Overall	interaction	0.197	0.675	NA
ADAM-TS13.Olink	Tier 3	F.1 Tofacitinib 10mg vs TNFi	contrast (CFB)	0.886	0.928	HR	1.108	0.718	0.272	4.524
ADAM-TS13.Olink	Tier 3	F.1 Tofacitinib 5mg vs TNFi	contrast (CFB)	0.2	0.954	HR	2.869	0.823	0.572	14.403
ADAM-TS13.Olink	Tier 3	G.0	contrast (Group)	0.935	0.948	DeltaLog	-0.005	0.066	-0.137	0.126
ADAM-TS13.Olink	Tier 3	G.1	contrast (Group)	0.636	0.921	DeltaLog	-0.031	0.065	-0.163	0.101
ANGPT1.Olink	Tier 3	A.0.bl Overall, possible interaction	ANOVA	0.48	0.566	NA
ANGPT1.Olink	Tier 3	A.1.bl Overall, no interaction	contrast (X)	0.587	0.926	HR	1.087	0.154	0.804	1.47
ANGPT1.Olink	Tier 3	A.1.bl Tofacitinib 10mg	contrast (X)	0.786	0.943	HR	1.072	0.256	0.649	1.77
ANGPT1.Olink	Tier 3	A.1.bl Tofacitinib 5mg	contrast (X)	0.174	0.623	HR	1.401	0.248	0.862	2.279
ANGPT1.Olink	Tier 3	A.1.bl TNFi	contrast (X)	0.581	0.82	HR	0.86	0.274	0.503	1.47
ANGPT1.Olink	Tier 3	A.0.12m Overall, possible interaction	ANOVA	0.399	0.736	NA
ANGPT1.Olink	Tier 3	A.1.12m Overall, no interaction	contrast (X)	0.967	0.992	HR	0.994	0.156	0.732	1.348
ANGPT1.Olink	Tier 3	A.1.12m Tofacitinib 10mg	contrast (X)	0.868	0.992	HR	0.963	0.23	0.613	1.512
ANGPT1.Olink	Tier 3	A.1.12m Tofacitinib 5mg	contrast (X)	0.197	0.676	HR	1.349	0.232	0.856	2.123
ANGPT1.Olink	Tier 3	A.1.12m TNFi	contrast (X)	0.311	0.678	HR	0.641	0.439	0.271	1.515
ANGPT1.Olink	Tier 3	B.0.bl Overall	interaction	0.362	0.654	NA
ANGPT1.Olink	Tier 3	B.1.bl Tofacitinib 10mg vs TNFi	contrast (X)	0.556	0.845	HR	1.247	0.375	0.597	2.603
ANGPT1.Olink	Tier 3	B.1.bl Tofacitinib 5mg vs TNFi	contrast (X)	0.187	0.561	HR	1.63	0.37	0.789	3.368
ANGPT1.Olink	Tier 3	B.0.12m Overall	interaction	0.229	0.663	NA
ANGPT1.Olink	Tier 3	B.1.12m Tofacitinib 10mg vs TNFi	contrast (X)	0.412	0.924	HR	1.502	0.496	0.568	3.972
ANGPT1.Olink	Tier 3	B.1.12m Tofacitinib 5mg vs TNFi	contrast (X)	0.136	0.522	HR	2.105	0.499	0.792	5.595
ANGPT1.Olink	Tier 3	C.0 Overall	ANOVA	0.659	0.833	NA
ANGPT1.Olink	Tier 3	C.1.all Tofacitinib 10mg vs TNFi	contrast (Arm)	0.776	0.941	DeltaLog	0.053	0.185	-0.311	0.416
ANGPT1.Olink	Tier 3	C.1.all Tofacitinib 5mg vs TNFi	contrast (Arm)	0.746	0.852	DeltaLog	-0.069	0.212	-0.484	0.347
ANGPT1.Olink	Tier 3	C.2.ctrl Tofacitinib 10mg vs TNFi	contrast (Arm)	0.903	0.973	DeltaLog	-0.025	0.208	-0.433	0.382
ANGPT1.Olink	Tier 3	C.2.ctrl Tofacitinib 5mg vs TNFi	contrast (Arm)	0.358	0.628	DeltaLog	-0.219	0.238	-0.684	0.247
ANGPT1.Olink	Tier 3	C.3.case Tofacitinib 10mg vs TNFi	contrast (Arm)	0.381	0.788	DeltaLog	0.362	0.413	-0.448	1.173
ANGPT1.Olink	Tier 3	C.3.case Tofacitinib 5mg vs TNFi	contrast (Arm)	0.271	0.789	DeltaLog	0.518	0.471	-0.405	1.442
ANGPT1.Olink	Tier 3	D.0 Overall	ANOVA	0.502	0.708	NA
ANGPT1.Olink	Tier 3	D.1.all Tofacitinib 10mg vs TNFi	contrast (Arm)	0.691	0.844	DeltaLog	-0.072	0.181	-0.426	0.282
ANGPT1.Olink	Tier 3	D.1.all Tofacitinib 5mg vs TNFi	contrast (Arm)	0.541	0.722	DeltaLog	0.125	0.205	-0.277	0.527
ANGPT1.Olink	Tier 3	D.2.ctrl Tofacitinib 10mg vs TNFi	contrast (Arm)	0.527	0.689	DeltaLog	-0.123	0.194	-0.502	0.257
ANGPT1.Olink	Tier 3	D.2.ctrl Tofacitinib 5mg vs TNFi	contrast (Arm)	0.952	0.965	DeltaLog	0.013	0.221	-0.419	0.446
ANGPT1.Olink	Tier 3	D.3.case Tofacitinib 10mg vs TNFi	contrast (Arm)	0.512	0.907	DeltaLog	0.337	0.515	-0.671	1.346
ANGPT1.Olink	Tier 3	D.3.case Tofacitinib 5mg vs TNFi	contrast (Arm)	0.124	0.475	DeltaLog	0.885	0.575	-0.243	2.013
ANGPT1.Olink	Tier 3	E.0 Overall	ANOVA	0.422	0.841	NA
ANGPT1.Olink	Tier 3	E.1 Tofacitinib 10mg	contrast (CFB)	0.842	0.944	HR	0.946	0.276	0.551	1.625
ANGPT1.Olink	Tier 3	E.1 Tofacitinib 5mg	contrast (CFB)	0.35	0.981	HR	1.338	0.311	0.727	2.462
ANGPT1.Olink	Tier 3	E.1 TNFi	contrast (CFB)	0.381	0.89	HR	0.531	0.723	0.129	2.189
ANGPT1.Olink	Tier 3	F.0 Overall	interaction	0.251	0.682	NA
ANGPT1.Olink	Tier 3	F.1 Tofacitinib 10mg vs TNFi	contrast (CFB)	0.457	0.89	HR	1.783	0.778	0.388	8.189
ANGPT1.Olink	Tier 3	F.1 Tofacitinib 5mg vs TNFi	contrast (CFB)	0.24	0.954	HR	2.52	0.786	0.54	11.762
ANGPT1.Olink	Tier 3	G.0	contrast (Group)	0.377	0.875	DeltaLog	0.287	0.323	-0.36	0.934
ANGPT1.Olink	Tier 3	G.1	contrast (Group)	0.475	0.823	DeltaLog	-0.265	0.367	-1.015	0.484
BNP.Olink	Tier 3	A.0.bl Overall, possible interaction	ANOVA	8.19e-07	5.9e-05	NA
BNP.Olink	Tier 3	A.1.bl Overall, no interaction	contrast (X)	0.000109	0.008	HR	1.9	0.166	1.373	2.63
BNP.Olink	Tier 3	A.1.bl Tofacitinib 10mg	contrast (X)	0.005	0.389	HR	1.888	0.228	1.207	2.954
BNP.Olink	Tier 3	A.1.bl Tofacitinib 5mg	contrast (X)	0.157	0.623	HR	1.484	0.279	0.859	2.563
BNP.Olink	Tier 3	A.1.bl TNFi	contrast (X)	0.016	0.358	HR	2.431	0.369	1.179	5.014
BNP.Olink	Tier 3	A.0.12m Overall, possible interaction	ANOVA	0.569	0.854	NA
BNP.Olink	Tier 3	A.1.12m Overall, no interaction	contrast (X)	0.472	0.906	HR	1.147	0.191	0.789	1.667
BNP.Olink	Tier 3	A.1.12m Tofacitinib 10mg	contrast (X)	0.408	0.992	HR	1.25	0.27	0.737	2.12
BNP.Olink	Tier 3	A.1.12m Tofacitinib 5mg	contrast (X)	0.742	0.875	HR	0.862	0.452	0.355	2.091
BNP.Olink	Tier 3	A.1.12m TNFi	contrast (X)	0.384	0.746	HR	1.309	0.31	0.714	2.403
BNP.Olink	Tier 3	B.0.bl Overall	interaction	0.313	0.654	NA
BNP.Olink	Tier 3	B.1.bl Tofacitinib 10mg vs TNFi	contrast (X)	0.564	0.845	HR	0.776	0.438	0.329	1.832
BNP.Olink	Tier 3	B.1.bl Tofacitinib 5mg vs TNFi	contrast (X)	0.287	0.656	HR	0.61	0.463	0.246	1.514
BNP.Olink	Tier 3	B.0.12m Overall	interaction	0.547	0.885	NA
BNP.Olink	Tier 3	B.1.12m Tofacitinib 10mg vs TNFi	contrast (X)	0.911	0.985	HR	0.955	0.413	0.425	2.145
BNP.Olink	Tier 3	B.1.12m Tofacitinib 5mg vs TNFi	contrast (X)	0.447	0.808	HR	0.658	0.55	0.224	1.935
BNP.Olink	Tier 3	C.0 Overall	ANOVA	0.54	0.833	NA
BNP.Olink	Tier 3	C.1.all Tofacitinib 10mg vs TNFi	contrast (Arm)	0.99	0.999	DeltaLog	0.002	0.158	-0.308	0.312
BNP.Olink	Tier 3	C.1.all Tofacitinib 5mg vs TNFi	contrast (Arm)	0.979	0.991	DeltaLog	0.005	0.181	-0.349	0.359
BNP.Olink	Tier 3	C.2.ctrl Tofacitinib 10mg vs TNFi	contrast (Arm)	0.579	0.886	DeltaLog	0.095	0.171	-0.24	0.429
BNP.Olink	Tier 3	C.2.ctrl Tofacitinib 5mg vs TNFi	contrast (Arm)	0.43	0.692	DeltaLog	0.154	0.195	-0.229	0.537
BNP.Olink	Tier 3	C.3.case Tofacitinib 10mg vs TNFi	contrast (Arm)	0.254	0.703	DeltaLog	-0.387	0.34	-1.053	0.278
BNP.Olink	Tier 3	C.3.case Tofacitinib 5mg vs TNFi	contrast (Arm)	0.12	0.752	DeltaLog	-0.602	0.387	-1.361	0.156
BNP.Olink	Tier 3	D.0 Overall	ANOVA	0.829	0.921	NA
BNP.Olink	Tier 3	D.1.all Tofacitinib 10mg vs TNFi	contrast (Arm)	0.661	0.826	DeltaLog	-0.058	0.131	-0.315	0.2
BNP.Olink	Tier 3	D.1.all Tofacitinib 5mg vs TNFi	contrast (Arm)	0.39	0.684	DeltaLog	-0.128	0.149	-0.419	0.164
BNP.Olink	Tier 3	D.2.ctrl Tofacitinib 10mg vs TNFi	contrast (Arm)	0.927	0.954	DeltaLog	-0.013	0.14	-0.288	0.262
BNP.Olink	Tier 3	D.2.ctrl Tofacitinib 5mg vs TNFi	contrast (Arm)	0.603	0.792	DeltaLog	-0.083	0.159	-0.396	0.23
BNP.Olink	Tier 3	D.3.case Tofacitinib 10mg vs TNFi	contrast (Arm)	0.358	0.892	DeltaLog	-0.343	0.373	-1.075	0.389
BNP.Olink	Tier 3	D.3.case Tofacitinib 5mg vs TNFi	contrast (Arm)	0.31	0.669	DeltaLog	-0.423	0.416	-1.239	0.393
BNP.Olink	Tier 3	E.0 Overall	ANOVA	0.112	0.382	NA
BNP.Olink	Tier 3	E.1 Tofacitinib 10mg	contrast (CFB)	0.062	0.635	HR	0.56	0.31	0.305	1.029
BNP.Olink	Tier 3	E.1 Tofacitinib 5mg	contrast (CFB)	0.59	0.981	HR	0.765	0.497	0.289	2.027
BNP.Olink	Tier 3	E.1 TNFi	contrast (CFB)	0.956	0.992	HR	0.976	0.447	0.406	2.343
BNP.Olink	Tier 3	F.0 Overall	interaction	0.511	0.898	NA
BNP.Olink	Tier 3	F.1 Tofacitinib 10mg vs TNFi	contrast (CFB)	0.31	0.801	HR	0.574	0.546	0.197	1.676
BNP.Olink	Tier 3	F.1 Tofacitinib 5mg vs TNFi	contrast (CFB)	0.718	0.954	HR	0.784	0.673	0.209	2.934
BNP.Olink	Tier 3	G.0	contrast (Group)	0.103	0.875	DeltaLog	0.416	0.251	-0.087	0.92
BNP.Olink	Tier 3	G.1	contrast (Group)	0.085	0.383	DeltaLog	-0.38	0.213	-0.815	0.055
CCL14.Olink	Tier 3	A.0.bl Overall, possible interaction	ANOVA	0.275	0.434	NA
CCL14.Olink	Tier 3	A.1.bl Overall, no interaction	contrast (X)	0.273	0.656	HR	1.207	0.172	0.862	1.689
CCL14.Olink	Tier 3	A.1.bl Tofacitinib 10mg	contrast (X)	0.201	0.936	HR	1.404	0.265	0.835	2.361
CCL14.Olink	Tier 3	A.1.bl Tofacitinib 5mg	contrast (X)	0.778	0.932	HR	0.945	0.202	0.636	1.402
CCL14.Olink	Tier 3	A.1.bl TNFi	contrast (X)	0.69	0.873	HR	1.178	0.411	0.526	2.637
CCL14.Olink	Tier 3	A.0.12m Overall, possible interaction	ANOVA	0.111	0.339	NA
CCL14.Olink	Tier 3	A.1.12m Overall, no interaction	contrast (X)	0.072	0.582	HR	1.499	0.225	0.965	2.33
CCL14.Olink	Tier 3	A.1.12m Tofacitinib 10mg	contrast (X)	0.189	0.992	HR	1.591	0.354	0.796	3.182
CCL14.Olink	Tier 3	A.1.12m Tofacitinib 5mg	contrast (X)	0.315	0.81	HR	1.506	0.407	0.678	3.345
CCL14.Olink	Tier 3	A.1.12m TNFi	contrast (X)	0.439	0.746	HR	1.335	0.373	0.642	2.775
CCL14.Olink	Tier 3	B.0.bl Overall	interaction	0.41	0.67	NA
CCL14.Olink	Tier 3	B.1.bl Tofacitinib 10mg vs TNFi	contrast (X)	0.72	0.907	HR	1.192	0.49	0.456	3.115
CCL14.Olink	Tier 3	B.1.bl Tofacitinib 5mg vs TNFi	contrast (X)	0.632	0.885	HR	0.802	0.461	0.325	1.979
CCL14.Olink	Tier 3	B.0.12m Overall	interaction	0.909	0.961	NA
CCL14.Olink	Tier 3	B.1.12m Tofacitinib 10mg vs TNFi	contrast (X)	0.732	0.924	HR	1.192	0.512	0.437	3.251
CCL14.Olink	Tier 3	B.1.12m Tofacitinib 5mg vs TNFi	contrast (X)	0.828	0.939	HR	1.128	0.554	0.38	3.343
CCL14.Olink	Tier 3	C.0 Overall	ANOVA	0.646	0.833	NA
CCL14.Olink	Tier 3	C.1.all Tofacitinib 10mg vs TNFi	contrast (Arm)	0.777	0.941	DeltaLog	-0.02	0.07	-0.158	0.118
CCL14.Olink	Tier 3	C.1.all Tofacitinib 5mg vs TNFi	contrast (Arm)	0.44	0.73	DeltaLog	-0.063	0.081	-0.222	0.096
CCL14.Olink	Tier 3	C.2.ctrl Tofacitinib 10mg vs TNFi	contrast (Arm)	0.733	0.937	DeltaLog	-0.027	0.078	-0.18	0.127
CCL14.Olink	Tier 3	C.2.ctrl Tofacitinib 5mg vs TNFi	contrast (Arm)	0.791	0.865	DeltaLog	-0.024	0.091	-0.202	0.154
CCL14.Olink	Tier 3	C.3.case Tofacitinib 10mg vs TNFi	contrast (Arm)	0.998	0.998	DeltaLog	0.000442	0.161	-0.315	0.316
CCL14.Olink	Tier 3	C.3.case Tofacitinib 5mg vs TNFi	contrast (Arm)	0.227	0.789	DeltaLog	-0.223	0.184	-0.584	0.138
CCL14.Olink	Tier 3	D.0 Overall	ANOVA	0.051	0.216	NA
CCL14.Olink	Tier 3	D.1.all Tofacitinib 10mg vs TNFi	contrast (Arm)	0.004	0.023	DeltaLog	-0.177	0.062	-0.3	-0.055
CCL14.Olink	Tier 3	D.1.all Tofacitinib 5mg vs TNFi	contrast (Arm)	0.336	0.658	DeltaLog	-0.07	0.072	-0.212	0.072
CCL14.Olink	Tier 3	D.2.ctrl Tofacitinib 10mg vs TNFi	contrast (Arm)	0.006	0.03	DeltaLog	-0.184	0.067	-0.314	-0.053
CCL14.Olink	Tier 3	D.2.ctrl Tofacitinib 5mg vs TNFi	contrast (Arm)	0.429	0.756	DeltaLog	-0.061	0.077	-0.213	0.09
CCL14.Olink	Tier 3	D.3.case Tofacitinib 10mg vs TNFi	contrast (Arm)	0.401	0.907	DeltaLog	-0.15	0.179	-0.5	0.2
CCL14.Olink	Tier 3	D.3.case Tofacitinib 5mg vs TNFi	contrast (Arm)	0.497	0.794	DeltaLog	-0.14	0.206	-0.543	0.263
CCL14.Olink	Tier 3	E.0 Overall	ANOVA	0.16	0.443	NA
CCL14.Olink	Tier 3	E.1 Tofacitinib 10mg	contrast (CFB)	0.178	0.939	HR	1.785	0.431	0.768	4.153
CCL14.Olink	Tier 3	E.1 Tofacitinib 5mg	contrast (CFB)	0.757	0.981	HR	1.177	0.527	0.419	3.306
CCL14.Olink	Tier 3	E.1 TNFi	contrast (CFB)	0.31	0.89	HR	1.423	0.347	0.721	2.808
CCL14.Olink	Tier 3	F.0 Overall	interaction	0.72	0.92	NA
CCL14.Olink	Tier 3	F.1 Tofacitinib 10mg vs TNFi	contrast (CFB)	0.68	0.928	HR	1.255	0.552	0.426	3.7
CCL14.Olink	Tier 3	F.1 Tofacitinib 5mg vs TNFi	contrast (CFB)	0.764	0.954	HR	0.828	0.631	0.24	2.851
CCL14.Olink	Tier 3	G.0	contrast (Group)	0.114	0.875	DeltaLog	0.176	0.11	-0.044	0.397
CCL14.Olink	Tier 3	G.1	contrast (Group)	0.976	0.998	DeltaLog	-0.004	0.136	-0.283	0.274
CCL15.Olink	Tier 3	A.0.bl Overall, possible interaction	ANOVA	0.253	0.414	NA
CCL15.Olink	Tier 3	A.1.bl Overall, no interaction	contrast (X)	0.145	0.497	HR	1.215	0.133	0.935	1.578
CCL15.Olink	Tier 3	A.1.bl Tofacitinib 10mg	contrast (X)	0.595	0.943	HR	1.117	0.209	0.742	1.682
CCL15.Olink	Tier 3	A.1.bl Tofacitinib 5mg	contrast (X)	0.496	0.771	HR	1.157	0.214	0.761	1.758
CCL15.Olink	Tier 3	A.1.bl TNFi	contrast (X)	0.105	0.361	HR	1.659	0.313	0.899	3.061
CCL15.Olink	Tier 3	A.0.12m Overall, possible interaction	ANOVA	0.237	0.55	NA
CCL15.Olink	Tier 3	A.1.12m Overall, no interaction	contrast (X)	0.616	0.906	HR	1.084	0.161	0.79	1.487
CCL15.Olink	Tier 3	A.1.12m Tofacitinib 10mg	contrast (X)	0.167	0.992	HR	1.362	0.224	0.879	2.112
CCL15.Olink	Tier 3	A.1.12m Tofacitinib 5mg	contrast (X)	0.916	0.929	HR	0.971	0.277	0.565	1.67
CCL15.Olink	Tier 3	A.1.12m TNFi	contrast (X)	0.13	0.558	HR	0.61	0.326	0.322	1.156
CCL15.Olink	Tier 3	B.0.bl Overall	interaction	0.47	0.685	NA
CCL15.Olink	Tier 3	B.1.bl Tofacitinib 10mg vs TNFi	contrast (X)	0.292	0.845	HR	0.673	0.376	0.323	1.406
CCL15.Olink	Tier 3	B.1.bl Tofacitinib 5mg vs TNFi	contrast (X)	0.341	0.673	HR	0.697	0.379	0.332	1.465
CCL15.Olink	Tier 3	B.0.12m Overall	interaction	0.138	0.546	NA
CCL15.Olink	Tier 3	B.1.12m Tofacitinib 10mg vs TNFi	contrast (X)	0.042	0.447	HR	2.234	0.394	1.031	4.84
CCL15.Olink	Tier 3	B.1.12m Tofacitinib 5mg vs TNFi	contrast (X)	0.274	0.751	HR	1.593	0.426	0.691	3.669
CCL15.Olink	Tier 3	C.0 Overall	ANOVA	0.017	0.41	NA
CCL15.Olink	Tier 3	C.1.all Tofacitinib 10mg vs TNFi	contrast (Arm)	0.018	0.319	DeltaLog	-0.209	0.088	-0.382	-0.036
CCL15.Olink	Tier 3	C.1.all Tofacitinib 5mg vs TNFi	contrast (Arm)	0.001	0.099	DeltaLog	-0.327	0.102	-0.527	-0.127
CCL15.Olink	Tier 3	C.2.ctrl Tofacitinib 10mg vs TNFi	contrast (Arm)	0.101	0.659	DeltaLog	-0.161	0.098	-0.354	0.031
CCL15.Olink	Tier 3	C.2.ctrl Tofacitinib 5mg vs TNFi	contrast (Arm)	0.012	0.17	DeltaLog	-0.285	0.114	-0.508	-0.062
CCL15.Olink	Tier 3	C.3.case Tofacitinib 10mg vs TNFi	contrast (Arm)	0.038	0.547	DeltaLog	-0.411	0.199	-0.8	-0.022
CCL15.Olink	Tier 3	C.3.case Tofacitinib 5mg vs TNFi	contrast (Arm)	0.028	0.592	DeltaLog	-0.504	0.229	-0.953	-0.055
CCL15.Olink	Tier 3	D.0 Overall	ANOVA	0.368	0.663	NA
CCL15.Olink	Tier 3	D.1.all Tofacitinib 10mg vs TNFi	contrast (Arm)	0.985	0.985	DeltaLog	0.001	0.067	-0.13	0.133
CCL15.Olink	Tier 3	D.1.all Tofacitinib 5mg vs TNFi	contrast (Arm)	0.71	0.816	DeltaLog	0.03	0.08	-0.127	0.186
CCL15.Olink	Tier 3	D.2.ctrl Tofacitinib 10mg vs TNFi	contrast (Arm)	0.485	0.689	DeltaLog	-0.05	0.072	-0.191	0.091
CCL15.Olink	Tier 3	D.2.ctrl Tofacitinib 5mg vs TNFi	contrast (Arm)	0.975	0.975	DeltaLog	-0.003	0.085	-0.169	0.164
CCL15.Olink	Tier 3	D.3.case Tofacitinib 10mg vs TNFi	contrast (Arm)	0.059	0.704	DeltaLog	0.348	0.184	-0.013	0.708
CCL15.Olink	Tier 3	D.3.case Tofacitinib 5mg vs TNFi	contrast (Arm)	0.24	0.616	DeltaLog	0.255	0.217	-0.17	0.681
CCL15.Olink	Tier 3	E.0 Overall	ANOVA	0.034	0.295	NA
CCL15.Olink	Tier 3	E.1 Tofacitinib 10mg	contrast (CFB)	0.296	0.944	HR	1.222	0.192	0.839	1.778
CCL15.Olink	Tier 3	E.1 Tofacitinib 5mg	contrast (CFB)	0.653	0.981	HR	0.593	1.161	0.061	5.771
CCL15.Olink	Tier 3	E.1 TNFi	contrast (CFB)	0.098	0.708	HR	0.219	0.917	0.036	1.325
CCL15.Olink	Tier 3	F.0 Overall	interaction	0.02	0.286	NA
CCL15.Olink	Tier 3	F.1 Tofacitinib 10mg vs TNFi	contrast (CFB)	0.068	0.563	HR	5.568	0.939	0.883	35.105
CCL15.Olink	Tier 3	F.1 Tofacitinib 5mg vs TNFi	contrast (CFB)	0.5	0.954	HR	2.704	1.476	0.15	48.776
CCL15.Olink	Tier 3	G.0	contrast (Group)	0.373	0.875	DeltaLog	0.092	0.103	-0.114	0.298
CCL15.Olink	Tier 3	G.1	contrast (Group)	0.859	0.998	DeltaLog	-0.025	0.138	-0.306	0.256
CCL16.Olink	Tier 3	A.0.bl Overall, possible interaction	ANOVA	0.015	0.14	NA
CCL16.Olink	Tier 3	A.1.bl Overall, no interaction	contrast (X)	0.066	0.474	HR	1.506	0.223	0.973	2.332
CCL16.Olink	Tier 3	A.1.bl Tofacitinib 10mg	contrast (X)	0.014	0.489	HR	2.053	0.291	1.16	3.635
CCL16.Olink	Tier 3	A.1.bl Tofacitinib 5mg	contrast (X)	0.329	0.683	HR	1.357	0.313	0.735	2.503
CCL16.Olink	Tier 3	A.1.bl TNFi	contrast (X)	0.881	0.957	HR	1.07	0.452	0.441	2.597
CCL16.Olink	Tier 3	A.0.12m Overall, possible interaction	ANOVA	0.102	0.332	NA
CCL16.Olink	Tier 3	A.1.12m Overall, no interaction	contrast (X)	0.14	0.629	HR	1.561	0.301	0.864	2.818
CCL16.Olink	Tier 3	A.1.12m Tofacitinib 10mg	contrast (X)	0.13	0.992	HR	1.673	0.34	0.859	3.257
CCL16.Olink	Tier 3	A.1.12m Tofacitinib 5mg	contrast (X)	0.26	0.78	HR	1.818	0.531	0.643	5.145
CCL16.Olink	Tier 3	A.1.12m TNFi	contrast (X)	0.781	0.927	HR	1.219	0.712	0.302	4.925
CCL16.Olink	Tier 3	B.0.bl Overall	interaction	0.206	0.567	NA
CCL16.Olink	Tier 3	B.1.bl Tofacitinib 10mg vs TNFi	contrast (X)	0.227	0.761	HR	1.919	0.54	0.666	5.525
CCL16.Olink	Tier 3	B.1.bl Tofacitinib 5mg vs TNFi	contrast (X)	0.666	0.885	HR	1.268	0.55	0.431	3.725
CCL16.Olink	Tier 3	B.0.12m Overall	interaction	0.734	0.912	NA
CCL16.Olink	Tier 3	B.1.12m Tofacitinib 10mg vs TNFi	contrast (X)	0.689	0.924	HR	1.372	0.791	0.291	6.464
CCL16.Olink	Tier 3	B.1.12m Tofacitinib 5mg vs TNFi	contrast (X)	0.653	0.922	HR	1.491	0.888	0.262	8.496
CCL16.Olink	Tier 3	C.0 Overall	ANOVA	0.604	0.833	NA
CCL16.Olink	Tier 3	C.1.all Tofacitinib 10mg vs TNFi	contrast (Arm)	0.333	0.889	DeltaLog	0.114	0.117	-0.116	0.343
CCL16.Olink	Tier 3	C.1.all Tofacitinib 5mg vs TNFi	contrast (Arm)	0.444	0.73	DeltaLog	0.104	0.136	-0.162	0.37
CCL16.Olink	Tier 3	C.2.ctrl Tofacitinib 10mg vs TNFi	contrast (Arm)	0.755	0.937	DeltaLog	0.041	0.13	-0.214	0.296
CCL16.Olink	Tier 3	C.2.ctrl Tofacitinib 5mg vs TNFi	contrast (Arm)	0.585	0.78	DeltaLog	0.082	0.151	-0.213	0.378
CCL16.Olink	Tier 3	C.3.case Tofacitinib 10mg vs TNFi	contrast (Arm)	0.129	0.603	DeltaLog	0.399	0.263	-0.116	0.914
CCL16.Olink	Tier 3	C.3.case Tofacitinib 5mg vs TNFi	contrast (Arm)	0.536	0.858	DeltaLog	0.188	0.303	-0.407	0.782
CCL16.Olink	Tier 3	D.0 Overall	ANOVA	0.741	0.875	NA
CCL16.Olink	Tier 3	D.1.all Tofacitinib 10mg vs TNFi	contrast (Arm)	0.89	0.957	DeltaLog	-0.011	0.082	-0.173	0.15
CCL16.Olink	Tier 3	D.1.all Tofacitinib 5mg vs TNFi	contrast (Arm)	0.408	0.684	DeltaLog	0.08	0.097	-0.109	0.269
CCL16.Olink	Tier 3	D.2.ctrl Tofacitinib 10mg vs TNFi	contrast (Arm)	0.673	0.829	DeltaLog	-0.037	0.089	-0.212	0.137
CCL16.Olink	Tier 3	D.2.ctrl Tofacitinib 5mg vs TNFi	contrast (Arm)	0.599	0.792	DeltaLog	0.055	0.104	-0.149	0.258
CCL16.Olink	Tier 3	D.3.case Tofacitinib 10mg vs TNFi	contrast (Arm)	0.478	0.907	DeltaLog	0.162	0.228	-0.286	0.61
CCL16.Olink	Tier 3	D.3.case Tofacitinib 5mg vs TNFi	contrast (Arm)	0.354	0.669	DeltaLog	0.249	0.269	-0.278	0.776
CCL16.Olink	Tier 3	E.0 Overall	ANOVA	0.839	0.979	NA
CCL16.Olink	Tier 3	E.1 Tofacitinib 10mg	contrast (CFB)	0.646	0.944	HR	1.177	0.355	0.587	2.361
CCL16.Olink	Tier 3	E.1 Tofacitinib 5mg	contrast (CFB)	0.93	0.981	HR	0.883	1.407	0.056	13.93
CCL16.Olink	Tier 3	E.1 TNFi	contrast (CFB)	0.64	0.89	HR	0.698	0.77	0.154	3.156
CCL16.Olink	Tier 3	F.0 Overall	interaction	0.656	0.92	NA
CCL16.Olink	Tier 3	F.1 Tofacitinib 10mg vs TNFi	contrast (CFB)	0.538	0.928	HR	1.687	0.848	0.32	8.899
CCL16.Olink	Tier 3	F.1 Tofacitinib 5mg vs TNFi	contrast (CFB)	0.883	0.954	HR	1.266	1.599	0.055	29.085
CCL16.Olink	Tier 3	G.0	contrast (Group)	0.027	0.732	DeltaLog	0.377	0.167	0.043	0.711
CCL16.Olink	Tier 3	G.1	contrast (Group)	0.757	0.995	DeltaLog	0.047	0.151	-0.26	0.355
CCL17.Olink	Tier 3	A.0.bl Overall, possible interaction	ANOVA	0.134	0.355	NA
CCL17.Olink	Tier 3	A.1.bl Overall, no interaction	contrast (X)	0.549	0.926	HR	1.096	0.153	0.812	1.478
CCL17.Olink	Tier 3	A.1.bl Tofacitinib 10mg	contrast (X)	0.455	0.936	HR	1.193	0.237	0.75	1.898
CCL17.Olink	Tier 3	A.1.bl Tofacitinib 5mg	contrast (X)	0.173	0.623	HR	1.325	0.207	0.884	1.987
CCL17.Olink	Tier 3	A.1.bl TNFi	contrast (X)	0.188	0.456	HR	0.606	0.381	0.287	1.278
CCL17.Olink	Tier 3	A.0.12m Overall, possible interaction	ANOVA	0.113	0.339	NA
CCL17.Olink	Tier 3	A.1.12m Overall, no interaction	contrast (X)	0.504	0.906	HR	0.859	0.228	0.55	1.342
CCL17.Olink	Tier 3	A.1.12m Tofacitinib 10mg	contrast (X)	0.878	0.992	HR	0.945	0.364	0.463	1.931
CCL17.Olink	Tier 3	A.1.12m Tofacitinib 5mg	contrast (X)	0.642	0.875	HR	1.141	0.283	0.655	1.988
CCL17.Olink	Tier 3	A.1.12m TNFi	contrast (X)	0.057	0.371	HR	0.377	0.512	0.138	1.028
CCL17.Olink	Tier 3	B.0.bl Overall	interaction	0.081	0.448	NA
CCL17.Olink	Tier 3	B.1.bl Tofacitinib 10mg vs TNFi	contrast (X)	0.131	0.761	HR	1.97	0.449	0.817	4.749
CCL17.Olink	Tier 3	B.1.bl Tofacitinib 5mg vs TNFi	contrast (X)	0.072	0.433	HR	2.188	0.435	0.932	5.135
CCL17.Olink	Tier 3	B.0.12m Overall	interaction	0.079	0.425	NA
CCL17.Olink	Tier 3	B.1.12m Tofacitinib 10mg vs TNFi	contrast (X)	0.146	0.695	HR	2.508	0.633	0.725	8.676
CCL17.Olink	Tier 3	B.1.12m Tofacitinib 5mg vs TNFi	contrast (X)	0.059	0.406	HR	3.026	0.587	0.957	9.566
CCL17.Olink	Tier 3	C.0 Overall	ANOVA	0.205	0.615	NA
CCL17.Olink	Tier 3	C.1.all Tofacitinib 10mg vs TNFi	contrast (Arm)	0.674	0.941	DeltaLog	-0.087	0.207	-0.493	0.319
CCL17.Olink	Tier 3	C.1.all Tofacitinib 5mg vs TNFi	contrast (Arm)	0.291	0.73	DeltaLog	-0.25	0.237	-0.714	0.214
CCL17.Olink	Tier 3	C.2.ctrl Tofacitinib 10mg vs TNFi	contrast (Arm)	0.237	0.742	DeltaLog	-0.273	0.231	-0.726	0.18
CCL17.Olink	Tier 3	C.2.ctrl Tofacitinib 5mg vs TNFi	contrast (Arm)	0.06	0.301	DeltaLog	-0.496	0.264	-1.013	0.022
CCL17.Olink	Tier 3	C.3.case Tofacitinib 10mg vs TNFi	contrast (Arm)	0.158	0.603	DeltaLog	0.648	0.459	-0.252	1.548
CCL17.Olink	Tier 3	C.3.case Tofacitinib 5mg vs TNFi	contrast (Arm)	0.171	0.789	DeltaLog	0.716	0.524	-0.31	1.743
CCL17.Olink	Tier 3	D.0 Overall	ANOVA	0.409	0.689	NA
CCL17.Olink	Tier 3	D.1.all Tofacitinib 10mg vs TNFi	contrast (Arm)	0.606	0.793	DeltaLog	0.095	0.184	-0.266	0.456
CCL17.Olink	Tier 3	D.1.all Tofacitinib 5mg vs TNFi	contrast (Arm)	0.144	0.414	DeltaLog	0.307	0.21	-0.105	0.718
CCL17.Olink	Tier 3	D.2.ctrl Tofacitinib 10mg vs TNFi	contrast (Arm)	0.835	0.898	DeltaLog	0.041	0.197	-0.346	0.428
CCL17.Olink	Tier 3	D.2.ctrl Tofacitinib 5mg vs TNFi	contrast (Arm)	0.345	0.709	DeltaLog	0.213	0.226	-0.229	0.656
CCL17.Olink	Tier 3	D.3.case Tofacitinib 10mg vs TNFi	contrast (Arm)	0.29	0.892	DeltaLog	0.555	0.524	-0.473	1.583
CCL17.Olink	Tier 3	D.3.case Tofacitinib 5mg vs TNFi	contrast (Arm)	0.092	0.475	DeltaLog	0.988	0.586	-0.161	2.136
CCL17.Olink	Tier 3	E.0 Overall	ANOVA	0.257	0.6	NA
CCL17.Olink	Tier 3	E.1 Tofacitinib 10mg	contrast (CFB)	0.663	0.944	HR	0.846	0.384	0.399	1.795
CCL17.Olink	Tier 3	E.1 Tofacitinib 5mg	contrast (CFB)	0.903	0.981	HR	1.058	0.46	0.429	2.608
CCL17.Olink	Tier 3	E.1 TNFi	contrast (CFB)	0.07	0.653	HR	0.438	0.456	0.179	1.069
CCL17.Olink	Tier 3	F.0 Overall	interaction	0.295	0.732	NA
CCL17.Olink	Tier 3	F.1 Tofacitinib 10mg vs TNFi	contrast (CFB)	0.276	0.765	HR	1.933	0.605	0.59	6.332
CCL17.Olink	Tier 3	F.1 Tofacitinib 5mg vs TNFi	contrast (CFB)	0.171	0.954	HR	2.417	0.644	0.684	8.536
CCL17.Olink	Tier 3	G.0	contrast (Group)	0.214	0.875	DeltaLog	0.407	0.323	-0.241	1.056
CCL17.Olink	Tier 3	G.1	contrast (Group)	0.969	0.998	DeltaLog	-0.013	0.34	-0.708	0.682
CCL18.Olink	Tier 3	A.0.bl Overall, possible interaction	ANOVA	0.092	0.317	NA
CCL18.Olink	Tier 3	A.1.bl Overall, no interaction	contrast (X)	0.206	0.569	HR	0.809	0.168	0.582	1.124
CCL18.Olink	Tier 3	A.1.bl Tofacitinib 10mg	contrast (X)	0.929	0.991	HR	1.023	0.256	0.62	1.689
CCL18.Olink	Tier 3	A.1.bl Tofacitinib 5mg	contrast (X)	0.114	0.587	HR	0.502	0.437	0.213	1.18
CCL18.Olink	Tier 3	A.1.bl TNFi	contrast (X)	0.228	0.477	HR	0.753	0.235	0.475	1.194
CCL18.Olink	Tier 3	A.0.12m Overall, possible interaction	ANOVA	0.647	0.854	NA
CCL18.Olink	Tier 3	A.1.12m Overall, no interaction	contrast (X)	0.872	0.992	HR	0.973	0.171	0.695	1.361
CCL18.Olink	Tier 3	A.1.12m Tofacitinib 10mg	contrast (X)	0.538	0.992	HR	1.16	0.24	0.724	1.858
CCL18.Olink	Tier 3	A.1.12m Tofacitinib 5mg	contrast (X)	0.369	0.865	HR	0.669	0.448	0.278	1.609
CCL18.Olink	Tier 3	A.1.12m TNFi	contrast (X)	0.9	0.953	HR	0.972	0.23	0.619	1.524
CCL18.Olink	Tier 3	B.0.bl Overall	interaction	0.142	0.488	NA
CCL18.Olink	Tier 3	B.1.bl Tofacitinib 10mg vs TNFi	contrast (X)	0.379	0.845	HR	1.358	0.348	0.687	2.686
CCL18.Olink	Tier 3	B.1.bl Tofacitinib 5mg vs TNFi	contrast (X)	0.412	0.7	HR	0.666	0.496	0.252	1.76
CCL18.Olink	Tier 3	B.0.12m Overall	interaction	0.443	0.849	NA
CCL18.Olink	Tier 3	B.1.12m Tofacitinib 10mg vs TNFi	contrast (X)	0.594	0.924	HR	1.194	0.332	0.623	2.289
CCL18.Olink	Tier 3	B.1.12m Tofacitinib 5mg vs TNFi	contrast (X)	0.459	0.808	HR	0.688	0.505	0.256	1.851
CCL18.Olink	Tier 3	C.0 Overall	ANOVA	0.306	0.688	NA
CCL18.Olink	Tier 3	C.1.all Tofacitinib 10mg vs TNFi	contrast (Arm)	0.131	0.75	DeltaLog	0.165	0.109	-0.049	0.378
CCL18.Olink	Tier 3	C.1.all Tofacitinib 5mg vs TNFi	contrast (Arm)	0.458	0.73	DeltaLog	0.093	0.126	-0.154	0.341
CCL18.Olink	Tier 3	C.2.ctrl Tofacitinib 10mg vs TNFi	contrast (Arm)	0.308	0.817	DeltaLog	0.123	0.121	-0.114	0.36
CCL18.Olink	Tier 3	C.2.ctrl Tofacitinib 5mg vs TNFi	contrast (Arm)	0.34	0.611	DeltaLog	0.134	0.14	-0.141	0.409
CCL18.Olink	Tier 3	C.3.case Tofacitinib 10mg vs TNFi	contrast (Arm)	0.167	0.603	DeltaLog	0.344	0.249	-0.144	0.831
CCL18.Olink	Tier 3	C.3.case Tofacitinib 5mg vs TNFi	contrast (Arm)	0.866	0.93	DeltaLog	-0.048	0.285	-0.607	0.511
CCL18.Olink	Tier 3	D.0 Overall	ANOVA	1.62e-11	5.84e-10	NA
CCL18.Olink	Tier 3	D.1.all Tofacitinib 10mg vs TNFi	contrast (Arm)	5.32e-14	1.92e-12	DeltaLog	-0.679	0.09	-0.856	-0.502
CCL18.Olink	Tier 3	D.1.all Tofacitinib 5mg vs TNFi	contrast (Arm)	8.25e-07	2.97e-05	DeltaLog	-0.515	0.105	-0.72	-0.31
CCL18.Olink	Tier 3	D.2.ctrl Tofacitinib 10mg vs TNFi	contrast (Arm)	1.02e-12	3.66e-11	DeltaLog	-0.69	0.097	-0.88	-0.501
CCL18.Olink	Tier 3	D.2.ctrl Tofacitinib 5mg vs TNFi	contrast (Arm)	3.56e-06	0.000128	DeltaLog	-0.521	0.112	-0.741	-0.301
CCL18.Olink	Tier 3	D.3.case Tofacitinib 10mg vs TNFi	contrast (Arm)	0.02	0.488	DeltaLog	-0.602	0.259	-1.11	-0.093
CCL18.Olink	Tier 3	D.3.case Tofacitinib 5mg vs TNFi	contrast (Arm)	0.113	0.475	DeltaLog	-0.474	0.299	-1.06	0.112
CCL18.Olink	Tier 3	E.0 Overall	ANOVA	0.884	0.979	NA
CCL18.Olink	Tier 3	E.1 Tofacitinib 10mg	contrast (CFB)	0.572	0.944	HR	1.164	0.269	0.687	1.971
CCL18.Olink	Tier 3	E.1 Tofacitinib 5mg	contrast (CFB)	0.773	0.981	HR	1.431	1.245	0.125	16.415
CCL18.Olink	Tier 3	E.1 TNFi	contrast (CFB)	0.899	0.983	HR	1.043	0.33	0.546	1.992
CCL18.Olink	Tier 3	F.0 Overall	interaction	0.924	0.979	NA
CCL18.Olink	Tier 3	F.1 Tofacitinib 10mg vs TNFi	contrast (CFB)	0.795	0.928	HR	1.116	0.424	0.486	2.561
CCL18.Olink	Tier 3	F.1 Tofacitinib 5mg vs TNFi	contrast (CFB)	0.806	0.954	HR	1.373	1.29	0.11	17.199
CCL18.Olink	Tier 3	G.0	contrast (Group)	0.423	0.875	DeltaLog	0.128	0.159	-0.19	0.447
CCL18.Olink	Tier 3	G.1	contrast (Group)	0.000294	0.021	DeltaLog	-0.572	0.14	-0.858	-0.287
CCL24.Olink	Tier 3	A.0.bl Overall, possible interaction	ANOVA	0.032	0.232	NA
CCL24.Olink	Tier 3	A.1.bl Overall, no interaction	contrast (X)	0.159	0.51	HR	1.298	0.185	0.903	1.866
CCL24.Olink	Tier 3	A.1.bl Tofacitinib 10mg	contrast (X)	0.089	0.878	HR	1.529	0.25	0.937	2.498
CCL24.Olink	Tier 3	A.1.bl Tofacitinib 5mg	contrast (X)	0.274	0.652	HR	1.433	0.329	0.752	2.729
CCL24.Olink	Tier 3	A.1.bl TNFi	contrast (X)	0.524	0.803	HR	0.74	0.473	0.292	1.871
CCL24.Olink	Tier 3	A.0.12m Overall, possible interaction	ANOVA	0.003	0.059	NA
CCL24.Olink	Tier 3	A.1.12m Overall, no interaction	contrast (X)	0.986	0.992	HR	1.005	0.25	0.616	1.639
CCL24.Olink	Tier 3	A.1.12m Tofacitinib 10mg	contrast (X)	0.719	0.992	HR	1.106	0.281	0.638	1.919
CCL24.Olink	Tier 3	A.1.12m Tofacitinib 5mg	contrast (X)	0.309	0.81	HR	1.704	0.523	0.611	4.754
CCL24.Olink	Tier 3	A.1.12m TNFi	contrast (X)	0.071	0.394	HR	0.247	0.775	0.054	1.128
CCL24.Olink	Tier 3	B.0.bl Overall	interaction	0.09	0.461	NA
CCL24.Olink	Tier 3	B.1.bl Tofacitinib 10mg vs TNFi	contrast (X)	0.176	0.761	HR	2.068	0.536	0.723	5.917
CCL24.Olink	Tier 3	B.1.bl Tofacitinib 5mg vs TNFi	contrast (X)	0.252	0.626	HR	1.937	0.577	0.625	6.004
CCL24.Olink	Tier 3	B.0.12m Overall	interaction	0.001	0.039	NA
CCL24.Olink	Tier 3	B.1.12m Tofacitinib 10mg vs TNFi	contrast (X)	0.072	0.588	HR	4.481	0.834	0.874	22.974
CCL24.Olink	Tier 3	B.1.12m Tofacitinib 5mg vs TNFi	contrast (X)	0.037	0.331	HR	6.901	0.925	1.126	42.283
CCL24.Olink	Tier 3	C.0 Overall	ANOVA	0.372	0.718	NA
CCL24.Olink	Tier 3	C.1.all Tofacitinib 10mg vs TNFi	contrast (Arm)	0.439	0.899	DeltaLog	0.1	0.13	-0.154	0.355
CCL24.Olink	Tier 3	C.1.all Tofacitinib 5mg vs TNFi	contrast (Arm)	0.495	0.73	DeltaLog	0.103	0.15	-0.192	0.397
CCL24.Olink	Tier 3	C.2.ctrl Tofacitinib 10mg vs TNFi	contrast (Arm)	0.876	0.973	DeltaLog	-0.022	0.144	-0.305	0.26
CCL24.Olink	Tier 3	C.2.ctrl Tofacitinib 5mg vs TNFi	contrast (Arm)	0.926	0.926	DeltaLog	0.015	0.167	-0.312	0.343
CCL24.Olink	Tier 3	C.3.case Tofacitinib 10mg vs TNFi	contrast (Arm)	0.041	0.547	DeltaLog	0.594	0.291	0.023	1.165
CCL24.Olink	Tier 3	C.3.case Tofacitinib 5mg vs TNFi	contrast (Arm)	0.176	0.789	DeltaLog	0.455	0.336	-0.204	1.114
CCL24.Olink	Tier 3	D.0 Overall	ANOVA	0.004	0.022	NA
CCL24.Olink	Tier 3	D.1.all Tofacitinib 10mg vs TNFi	contrast (Arm)	0.008	0.038	DeltaLog	-0.205	0.077	-0.356	-0.053
CCL24.Olink	Tier 3	D.1.all Tofacitinib 5mg vs TNFi	contrast (Arm)	0.568	0.744	DeltaLog	-0.052	0.091	-0.229	0.126
CCL24.Olink	Tier 3	D.2.ctrl Tofacitinib 10mg vs TNFi	contrast (Arm)	0.002	0.012	DeltaLog	-0.252	0.082	-0.412	-0.091
CCL24.Olink	Tier 3	D.2.ctrl Tofacitinib 5mg vs TNFi	contrast (Arm)	0.137	0.52	DeltaLog	-0.142	0.096	-0.33	0.045
CCL24.Olink	Tier 3	D.3.case Tofacitinib 10mg vs TNFi	contrast (Arm)	0.554	0.907	DeltaLog	0.126	0.212	-0.291	0.542
CCL24.Olink	Tier 3	D.3.case Tofacitinib 5mg vs TNFi	contrast (Arm)	0.024	0.4	DeltaLog	0.562	0.249	0.074	1.05
CCL24.Olink	Tier 3	E.0 Overall	ANOVA	0.001	0.101	NA
CCL24.Olink	Tier 3	E.1 Tofacitinib 10mg	contrast (CFB)	0.235	0.939	HR	0.611	0.415	0.271	1.378
CCL24.Olink	Tier 3	E.1 Tofacitinib 5mg	contrast (CFB)	0.613	0.981	HR	2.007	1.376	0.135	29.776
CCL24.Olink	Tier 3	E.1 TNFi	contrast (CFB)	0.043	0.653	HR	0.048	1.504	0.003	0.91
CCL24.Olink	Tier 3	F.0 Overall	interaction	0.004	0.277	NA
CCL24.Olink	Tier 3	F.1 Tofacitinib 10mg vs TNFi	contrast (CFB)	0.103	0.676	HR	12.812	1.565	0.596	275.39
CCL24.Olink	Tier 3	F.1 Tofacitinib 5mg vs TNFi	contrast (CFB)	0.065	0.776	HR	42.06	2.024	0.796	2220
CCL24.Olink	Tier 3	G.0	contrast (Group)	0.254	0.875	DeltaLog	0.227	0.197	-0.168	0.622
CCL24.Olink	Tier 3	G.1	contrast (Group)	0.097	0.396	DeltaLog	-0.273	0.16	-0.599	0.052
CCL3.Olink	Tier 3	A.0.bl Overall, possible interaction	ANOVA	0.456	0.566	NA
CCL3.Olink	Tier 3	A.1.bl Overall, no interaction	contrast (X)	0.915	0.943	HR	1.015	0.14	0.771	1.337
CCL3.Olink	Tier 3	A.1.bl Tofacitinib 10mg	contrast (X)	0.35	0.936	HR	1.244	0.233	0.787	1.965
CCL3.Olink	Tier 3	A.1.bl Tofacitinib 5mg	contrast (X)	0.817	0.948	HR	0.932	0.302	0.516	1.686
CCL3.Olink	Tier 3	A.1.bl TNFi	contrast (X)	0.238	0.477	HR	0.768	0.223	0.496	1.19
CCL3.Olink	Tier 3	A.0.12m Overall, possible interaction	ANOVA	0.908	0.938	NA
CCL3.Olink	Tier 3	A.1.12m Overall, no interaction	contrast (X)	0.678	0.948	HR	0.902	0.247	0.556	1.465
CCL3.Olink	Tier 3	A.1.12m Tofacitinib 10mg	contrast (X)	0.97	0.992	HR	0.983	0.458	0.401	2.411
CCL3.Olink	Tier 3	A.1.12m Tofacitinib 5mg	contrast (X)	0.876	0.901	HR	0.919	0.539	0.319	2.646
CCL3.Olink	Tier 3	A.1.12m TNFi	contrast (X)	0.445	0.746	HR	0.789	0.31	0.43	1.449
CCL3.Olink	Tier 3	B.0.bl Overall	interaction	0.273	0.654	NA
CCL3.Olink	Tier 3	B.1.bl Tofacitinib 10mg vs TNFi	contrast (X)	0.135	0.761	HR	1.619	0.322	0.861	3.046
CCL3.Olink	Tier 3	B.1.bl Tofacitinib 5mg vs TNFi	contrast (X)	0.607	0.884	HR	1.214	0.376	0.581	2.537
CCL3.Olink	Tier 3	B.0.12m Overall	interaction	0.887	0.961	NA
CCL3.Olink	Tier 3	B.1.12m Tofacitinib 10mg vs TNFi	contrast (X)	0.691	0.924	HR	1.246	0.552	0.423	3.672
CCL3.Olink	Tier 3	B.1.12m Tofacitinib 5mg vs TNFi	contrast (X)	0.806	0.939	HR	1.164	0.62	0.346	3.921
CCL3.Olink	Tier 3	C.0 Overall	ANOVA	0.126	0.522	NA
CCL3.Olink	Tier 3	C.1.all Tofacitinib 10mg vs TNFi	contrast (Arm)	0.412	0.898	DeltaLog	-0.102	0.124	-0.346	0.142
CCL3.Olink	Tier 3	C.1.all Tofacitinib 5mg vs TNFi	contrast (Arm)	0.028	0.336	DeltaLog	-0.312	0.142	-0.59	-0.033
CCL3.Olink	Tier 3	C.2.ctrl Tofacitinib 10mg vs TNFi	contrast (Arm)	0.176	0.677	DeltaLog	-0.189	0.14	-0.462	0.085
CCL3.Olink	Tier 3	C.2.ctrl Tofacitinib 5mg vs TNFi	contrast (Arm)	0.027	0.191	DeltaLog	-0.354	0.16	-0.667	-0.041
CCL3.Olink	Tier 3	C.3.case Tofacitinib 10mg vs TNFi	contrast (Arm)	0.388	0.788	DeltaLog	0.24	0.277	-0.304	0.784
CCL3.Olink	Tier 3	C.3.case Tofacitinib 5mg vs TNFi	contrast (Arm)	0.656	0.885	DeltaLog	-0.141	0.316	-0.761	0.479
CCL3.Olink	Tier 3	D.0 Overall	ANOVA	0.326	0.617	NA
CCL3.Olink	Tier 3	D.1.all Tofacitinib 10mg vs TNFi	contrast (Arm)	0.041	0.11	DeltaLog	0.205	0.101	0.008	0.403
CCL3.Olink	Tier 3	D.1.all Tofacitinib 5mg vs TNFi	contrast (Arm)	0.08	0.298	DeltaLog	0.201	0.115	-0.024	0.427
CCL3.Olink	Tier 3	D.2.ctrl Tofacitinib 10mg vs TNFi	contrast (Arm)	0.068	0.182	DeltaLog	0.198	0.108	-0.015	0.41
CCL3.Olink	Tier 3	D.2.ctrl Tofacitinib 5mg vs TNFi	contrast (Arm)	0.118	0.501	DeltaLog	0.194	0.124	-0.049	0.438
CCL3.Olink	Tier 3	D.3.case Tofacitinib 10mg vs TNFi	contrast (Arm)	0.337	0.892	DeltaLog	0.276	0.287	-0.287	0.839
CCL3.Olink	Tier 3	D.3.case Tofacitinib 5mg vs TNFi	contrast (Arm)	0.409	0.7	DeltaLog	0.265	0.321	-0.364	0.894
CCL3.Olink	Tier 3	E.0 Overall	ANOVA	0.946	0.988	NA
CCL3.Olink	Tier 3	E.1 Tofacitinib 10mg	contrast (CFB)	0.858	0.944	HR	0.913	0.513	0.334	2.493
CCL3.Olink	Tier 3	E.1 Tofacitinib 5mg	contrast (CFB)	0.826	0.981	HR	0.806	0.978	0.119	5.485
CCL3.Olink	Tier 3	E.1 TNFi	contrast (CFB)	0.751	0.943	HR	0.824	0.609	0.25	2.719
CCL3.Olink	Tier 3	F.0 Overall	interaction	0.974	0.979	NA
CCL3.Olink	Tier 3	F.1 Tofacitinib 10mg vs TNFi	contrast (CFB)	0.898	0.928	HR	1.107	0.796	0.233	5.268
CCL3.Olink	Tier 3	F.1 Tofacitinib 5mg vs TNFi	contrast (CFB)	0.985	0.994	HR	0.978	1.147	0.103	9.265
CCL3.Olink	Tier 3	G.0	contrast (Group)	0.481	0.875	DeltaLog	0.132	0.186	-0.241	0.505
CCL3.Olink	Tier 3	G.1	contrast (Group)	0.28	0.568	DeltaLog	0.225	0.205	-0.193	0.643
CCL5.Olink	Tier 3	A.0.bl Overall, possible interaction	ANOVA	0.102	0.334	NA
CCL5.Olink	Tier 3	A.1.bl Overall, no interaction	contrast (X)	0.816	0.943	HR	1.036	0.151	0.77	1.393
CCL5.Olink	Tier 3	A.1.bl Tofacitinib 10mg	contrast (X)	0.723	0.943	HR	1.089	0.242	0.678	1.75
CCL5.Olink	Tier 3	A.1.bl Tofacitinib 5mg	contrast (X)	0.092	0.587	HR	1.453	0.222	0.94	2.245
CCL5.Olink	Tier 3	A.1.bl TNFi	contrast (X)	0.088	0.361	HR	0.6	0.299	0.334	1.078
CCL5.Olink	Tier 3	A.0.12m Overall, possible interaction	ANOVA	0.002	0.04	NA
CCL5.Olink	Tier 3	A.1.12m Overall, no interaction	contrast (X)	0.985	0.992	HR	0.997	0.187	0.691	1.437
CCL5.Olink	Tier 3	A.1.12m Tofacitinib 10mg	contrast (X)	0.708	0.992	HR	1.11	0.278	0.644	1.913
CCL5.Olink	Tier 3	A.1.12m Tofacitinib 5mg	contrast (X)	0.131	0.673	HR	1.63	0.323	0.865	3.073
CCL5.Olink	Tier 3	A.1.12m TNFi	contrast (X)	0.02	0.371	HR	0.228	0.637	0.066	0.796
CCL5.Olink	Tier 3	B.0.bl Overall	interaction	0.047	0.437	NA
CCL5.Olink	Tier 3	B.1.bl Tofacitinib 10mg vs TNFi	contrast (X)	0.121	0.761	HR	1.815	0.385	0.854	3.857
CCL5.Olink	Tier 3	B.1.bl Tofacitinib 5mg vs TNFi	contrast (X)	0.017	0.433	HR	2.421	0.372	1.168	5.019
CCL5.Olink	Tier 3	B.0.12m Overall	interaction	0.000497	0.036	NA
CCL5.Olink	Tier 3	B.1.12m Tofacitinib 10mg vs TNFi	contrast (X)	0.023	0.447	HR	4.86	0.696	1.241	19.032
CCL5.Olink	Tier 3	B.1.12m Tofacitinib 5mg vs TNFi	contrast (X)	0.006	0.231	HR	7.14	0.718	1.748	29.174
CCL5.Olink	Tier 3	C.0 Overall	ANOVA	0.246	0.656	NA
CCL5.Olink	Tier 3	C.1.all Tofacitinib 10mg vs TNFi	contrast (Arm)	0.837	0.941	DeltaLog	0.039	0.191	-0.334	0.413
CCL5.Olink	Tier 3	C.1.all Tofacitinib 5mg vs TNFi	contrast (Arm)	0.991	0.991	DeltaLog	0.003	0.22	-0.429	0.434
CCL5.Olink	Tier 3	C.2.ctrl Tofacitinib 10mg vs TNFi	contrast (Arm)	0.574	0.886	DeltaLog	-0.119	0.211	-0.532	0.295
CCL5.Olink	Tier 3	C.2.ctrl Tofacitinib 5mg vs TNFi	contrast (Arm)	0.322	0.594	DeltaLog	-0.242	0.244	-0.722	0.237
CCL5.Olink	Tier 3	C.3.case Tofacitinib 10mg vs TNFi	contrast (Arm)	0.099	0.547	DeltaLog	0.716	0.434	-0.134	1.566
CCL5.Olink	Tier 3	C.3.case Tofacitinib 5mg vs TNFi	contrast (Arm)	0.04	0.592	DeltaLog	1.02	0.497	0.045	1.995
CCL5.Olink	Tier 3	D.0 Overall	ANOVA	0.226	0.478	NA
CCL5.Olink	Tier 3	D.1.all Tofacitinib 10mg vs TNFi	contrast (Arm)	0.722	0.866	DeltaLog	-0.067	0.189	-0.437	0.303
CCL5.Olink	Tier 3	D.1.all Tofacitinib 5mg vs TNFi	contrast (Arm)	0.338	0.658	DeltaLog	0.21	0.219	-0.219	0.639
CCL5.Olink	Tier 3	D.2.ctrl Tofacitinib 10mg vs TNFi	contrast (Arm)	0.389	0.571	DeltaLog	-0.174	0.201	-0.568	0.221
CCL5.Olink	Tier 3	D.2.ctrl Tofacitinib 5mg vs TNFi	contrast (Arm)	0.784	0.882	DeltaLog	0.064	0.234	-0.395	0.523
CCL5.Olink	Tier 3	D.3.case Tofacitinib 10mg vs TNFi	contrast (Arm)	0.19	0.884	DeltaLog	0.71	0.541	-0.351	1.771
CCL5.Olink	Tier 3	D.3.case Tofacitinib 5mg vs TNFi	contrast (Arm)	0.047	0.475	DeltaLog	1.241	0.625	0.017	2.465
CCL5.Olink	Tier 3	E.0 Overall	ANOVA	0.111	0.382	NA
CCL5.Olink	Tier 3	E.1 Tofacitinib 10mg	contrast (CFB)	0.69	0.944	HR	1.113	0.268	0.658	1.882
CCL5.Olink	Tier 3	E.1 Tofacitinib 5mg	contrast (CFB)	0.361	0.981	HR	1.499	0.443	0.629	3.575
CCL5.Olink	Tier 3	E.1 TNFi	contrast (CFB)	0.05	0.653	HR	0.38	0.494	0.144	1
CCL5.Olink	Tier 3	F.0 Overall	interaction	0.05	0.297	NA
CCL5.Olink	Tier 3	F.1 Tofacitinib 10mg vs TNFi	contrast (CFB)	0.058	0.563	HR	2.928	0.567	0.964	8.895
CCL5.Olink	Tier 3	F.1 Tofacitinib 5mg vs TNFi	contrast (CFB)	0.039	0.757	HR	3.945	0.666	1.069	14.551
CCL5.Olink	Tier 3	G.0	contrast (Group)	0.245	0.875	DeltaLog	0.419	0.357	-0.296	1.135
CCL5.Olink	Tier 3	G.1	contrast (Group)	0.633	0.921	DeltaLog	-0.195	0.403	-1.017	0.628
CD163.Olink	Tier 3	A.0.bl Overall, possible interaction	ANOVA	0.451	0.566	NA
CD163.Olink	Tier 3	A.1.bl Overall, no interaction	contrast (X)	0.205	0.569	HR	0.845	0.133	0.651	1.097
CD163.Olink	Tier 3	A.1.bl Tofacitinib 10mg	contrast (X)	0.12	0.878	HR	0.763	0.174	0.543	1.073
CD163.Olink	Tier 3	A.1.bl Tofacitinib 5mg	contrast (X)	0.991	0.998	HR	0.997	0.287	0.568	1.749
CD163.Olink	Tier 3	A.1.bl TNFi	contrast (X)	0.802	0.894	HR	0.93	0.29	0.527	1.642
CD163.Olink	Tier 3	A.0.12m Overall, possible interaction	ANOVA	0.455	0.787	NA
CD163.Olink	Tier 3	A.1.12m Overall, no interaction	contrast (X)	0.446	0.906	HR	0.901	0.136	0.69	1.177
CD163.Olink	Tier 3	A.1.12m Tofacitinib 10mg	contrast (X)	0.435	0.992	HR	0.887	0.154	0.656	1.199
CD163.Olink	Tier 3	A.1.12m Tofacitinib 5mg	contrast (X)	0.622	0.875	HR	1.175	0.327	0.619	2.229
CD163.Olink	Tier 3	A.1.12m TNFi	contrast (X)	0.052	0.371	HR	0.632	0.236	0.398	1.004
CD163.Olink	Tier 3	B.0.bl Overall	interaction	0.643	0.798	NA
CD163.Olink	Tier 3	B.1.bl Tofacitinib 10mg vs TNFi	contrast (X)	0.559	0.845	HR	0.821	0.338	0.423	1.593
CD163.Olink	Tier 3	B.1.bl Tofacitinib 5mg vs TNFi	contrast (X)	0.865	0.969	HR	1.072	0.409	0.481	2.388
CD163.Olink	Tier 3	B.0.12m Overall	interaction	0.35	0.787	NA
CD163.Olink	Tier 3	B.1.12m Tofacitinib 10mg vs TNFi	contrast (X)	0.229	0.822	HR	1.402	0.281	0.808	2.432
CD163.Olink	Tier 3	B.1.12m Tofacitinib 5mg vs TNFi	contrast (X)	0.123	0.522	HR	1.857	0.402	0.845	4.083
CD163.Olink	Tier 3	C.0 Overall	ANOVA	0.054	0.522	NA
CD163.Olink	Tier 3	C.1.all Tofacitinib 10mg vs TNFi	contrast (Arm)	0.667	0.941	DeltaLog	-0.034	0.08	-0.19	0.122
CD163.Olink	Tier 3	C.1.all Tofacitinib 5mg vs TNFi	contrast (Arm)	0.009	0.295	DeltaLog	-0.24	0.092	-0.421	-0.06
CD163.Olink	Tier 3	C.2.ctrl Tofacitinib 10mg vs TNFi	contrast (Arm)	0.929	0.973	DeltaLog	-0.008	0.089	-0.182	0.166
CD163.Olink	Tier 3	C.2.ctrl Tofacitinib 5mg vs TNFi	contrast (Arm)	0.019	0.17	DeltaLog	-0.242	0.103	-0.444	-0.04
CD163.Olink	Tier 3	C.3.case Tofacitinib 10mg vs TNFi	contrast (Arm)	0.448	0.788	DeltaLog	-0.136	0.18	-0.488	0.216
CD163.Olink	Tier 3	C.3.case Tofacitinib 5mg vs TNFi	contrast (Arm)	0.261	0.789	DeltaLog	-0.233	0.207	-0.639	0.173
CD163.Olink	Tier 3	D.0 Overall	ANOVA	0.000169	0.001	NA
CD163.Olink	Tier 3	D.1.all Tofacitinib 10mg vs TNFi	contrast (Arm)	7.81e-05	0.000562	DeltaLog	-0.268	0.068	-0.402	-0.135
CD163.Olink	Tier 3	D.1.all Tofacitinib 5mg vs TNFi	contrast (Arm)	0.000123	0.003	DeltaLog	-0.31	0.081	-0.468	-0.152
CD163.Olink	Tier 3	D.2.ctrl Tofacitinib 10mg vs TNFi	contrast (Arm)	1.76e-05	0.00014	DeltaLog	-0.313	0.073	-0.455	-0.17
CD163.Olink	Tier 3	D.2.ctrl Tofacitinib 5mg vs TNFi	contrast (Arm)	4.82e-05	0.001	DeltaLog	-0.351	0.086	-0.521	-0.182
CD163.Olink	Tier 3	D.3.case Tofacitinib 10mg vs TNFi	contrast (Arm)	0.878	0.98	DeltaLog	0.029	0.187	-0.339	0.396
CD163.Olink	Tier 3	D.3.case Tofacitinib 5mg vs TNFi	contrast (Arm)	0.9	0.939	DeltaLog	-0.028	0.22	-0.46	0.404
CD163.Olink	Tier 3	E.0 Overall	ANOVA	0.259	0.6	NA
CD163.Olink	Tier 3	E.1 Tofacitinib 10mg	contrast (CFB)	0.884	0.944	HR	1.028	0.188	0.711	1.485
CD163.Olink	Tier 3	E.1 Tofacitinib 5mg	contrast (CFB)	0.762	0.981	HR	0.83	0.615	0.249	2.772
CD163.Olink	Tier 3	E.1 TNFi	contrast (CFB)	0.038	0.653	HR	0.457	0.377	0.218	0.957
CD163.Olink	Tier 3	F.0 Overall	interaction	0.216	0.676	NA
CD163.Olink	Tier 3	F.1 Tofacitinib 10mg vs TNFi	contrast (CFB)	0.054	0.563	HR	2.248	0.42	0.988	5.117
CD163.Olink	Tier 3	F.1 Tofacitinib 5mg vs TNFi	contrast (CFB)	0.406	0.954	HR	1.816	0.718	0.445	7.418
CD163.Olink	Tier 3	G.0	contrast (Group)	0.281	0.875	DeltaLog	-0.128	0.118	-0.365	0.108
CD163.Olink	Tier 3	G.1	contrast (Group)	0.211	0.522	DeltaLog	-0.154	0.121	-0.399	0.091
CD40-L.Olink	Tier 3	A.0.bl Overall, possible interaction	ANOVA	0.038	0.244	NA
CD40-L.Olink	Tier 3	A.1.bl Overall, no interaction	contrast (X)	0.7	0.938	HR	0.94	0.16	0.688	1.286
CD40-L.Olink	Tier 3	A.1.bl Tofacitinib 10mg	contrast (X)	0.571	0.943	HR	1.12	0.2	0.757	1.659
CD40-L.Olink	Tier 3	A.1.bl Tofacitinib 5mg	contrast (X)	0.735	0.932	HR	1.116	0.323	0.593	2.101
CD40-L.Olink	Tier 3	A.1.bl TNFi	contrast (X)	0.024	0.358	HR	0.423	0.381	0.2	0.893
CD40-L.Olink	Tier 3	A.0.12m Overall, possible interaction	ANOVA	0.093	0.332	NA
CD40-L.Olink	Tier 3	A.1.12m Overall, no interaction	contrast (X)	0.899	0.992	HR	0.979	0.164	0.71	1.351
CD40-L.Olink	Tier 3	A.1.12m Tofacitinib 10mg	contrast (X)	0.607	0.992	HR	1.129	0.235	0.712	1.789
CD40-L.Olink	Tier 3	A.1.12m Tofacitinib 5mg	contrast (X)	0.525	0.875	HR	1.161	0.235	0.733	1.84
CD40-L.Olink	Tier 3	A.1.12m TNFi	contrast (X)	0.012	0.371	HR	0.384	0.379	0.183	0.808
CD40-L.Olink	Tier 3	B.0.bl Overall	interaction	0.017	0.322	NA
CD40-L.Olink	Tier 3	B.1.bl Tofacitinib 10mg vs TNFi	contrast (X)	0.023	0.545	HR	2.648	0.429	1.143	6.135
CD40-L.Olink	Tier 3	B.1.bl Tofacitinib 5mg vs TNFi	contrast (X)	0.053	0.433	HR	2.637	0.502	0.986	7.053
CD40-L.Olink	Tier 3	B.0.12m Overall	interaction	0.041	0.322	NA
CD40-L.Olink	Tier 3	B.1.12m Tofacitinib 10mg vs TNFi	contrast (X)	0.017	0.447	HR	2.937	0.453	1.208	7.139
CD40-L.Olink	Tier 3	B.1.12m Tofacitinib 5mg vs TNFi	contrast (X)	0.013	0.231	HR	3.022	0.448	1.257	7.265
CD40-L.Olink	Tier 3	C.0 Overall	ANOVA	0.116	0.522	NA
CD40-L.Olink	Tier 3	C.1.all Tofacitinib 10mg vs TNFi	contrast (Arm)	0.869	0.941	DeltaLog	-0.049	0.3	-0.636	0.538
CD40-L.Olink	Tier 3	C.1.all Tofacitinib 5mg vs TNFi	contrast (Arm)	0.395	0.73	DeltaLog	-0.291	0.342	-0.962	0.38
CD40-L.Olink	Tier 3	C.2.ctrl Tofacitinib 10mg vs TNFi	contrast (Arm)	0.222	0.726	DeltaLog	-0.407	0.333	-1.059	0.246
CD40-L.Olink	Tier 3	C.2.ctrl Tofacitinib 5mg vs TNFi	contrast (Arm)	0.086	0.325	DeltaLog	-0.654	0.381	-1.4	0.092
CD40-L.Olink	Tier 3	C.3.case Tofacitinib 10mg vs TNFi	contrast (Arm)	0.038	0.547	DeltaLog	1.374	0.662	0.076	2.671
CD40-L.Olink	Tier 3	C.3.case Tofacitinib 5mg vs TNFi	contrast (Arm)	0.127	0.752	DeltaLog	1.153	0.755	-0.327	2.633
CD40-L.Olink	Tier 3	D.0 Overall	ANOVA	0.527	0.729	NA
CD40-L.Olink	Tier 3	D.1.all Tofacitinib 10mg vs TNFi	contrast (Arm)	0.966	0.98	DeltaLog	0.011	0.269	-0.516	0.538
CD40-L.Olink	Tier 3	D.1.all Tofacitinib 5mg vs TNFi	contrast (Arm)	0.267	0.601	DeltaLog	0.34	0.307	-0.261	0.941
CD40-L.Olink	Tier 3	D.2.ctrl Tofacitinib 10mg vs TNFi	contrast (Arm)	0.897	0.936	DeltaLog	-0.037	0.289	-0.604	0.529
CD40-L.Olink	Tier 3	D.2.ctrl Tofacitinib 5mg vs TNFi	contrast (Arm)	0.533	0.792	DeltaLog	0.206	0.33	-0.441	0.853
CD40-L.Olink	Tier 3	D.3.case Tofacitinib 10mg vs TNFi	contrast (Arm)	0.594	0.907	DeltaLog	0.411	0.77	-1.099	1.921
CD40-L.Olink	Tier 3	D.3.case Tofacitinib 5mg vs TNFi	contrast (Arm)	0.152	0.475	DeltaLog	1.23	0.858	-0.451	2.911
CD40-L.Olink	Tier 3	E.0 Overall	ANOVA	0.432	0.841	NA
CD40-L.Olink	Tier 3	E.1 Tofacitinib 10mg	contrast (CFB)	0.988	0.988	HR	1.004	0.243	0.623	1.616
CD40-L.Olink	Tier 3	E.1 Tofacitinib 5mg	contrast (CFB)	0.232	0.981	HR	1.449	0.311	0.788	2.665
CD40-L.Olink	Tier 3	E.1 TNFi	contrast (CFB)	0.205	0.89	HR	0.549	0.474	0.217	1.389
CD40-L.Olink	Tier 3	F.0 Overall	interaction	0.256	0.682	NA
CD40-L.Olink	Tier 3	F.1 Tofacitinib 10mg vs TNFi	contrast (CFB)	0.268	0.765	HR	1.828	0.544	0.629	5.315
CD40-L.Olink	Tier 3	F.1 Tofacitinib 5mg vs TNFi	contrast (CFB)	0.089	0.803	HR	2.64	0.571	0.862	8.088
CD40-L.Olink	Tier 3	G.0	contrast (Group)	0.707	0.931	DeltaLog	0.176	0.465	-0.757	1.109
CD40-L.Olink	Tier 3	G.1	contrast (Group)	0.614	0.921	DeltaLog	-0.237	0.466	-1.188	0.714
CST3.Olink	Tier 3	A.0.bl Overall, possible interaction	ANOVA	0.193	0.381	NA
CST3.Olink	Tier 3	A.1.bl Overall, no interaction	contrast (X)	0.108	0.482	HR	1.255	0.141	0.952	1.655
CST3.Olink	Tier 3	A.1.bl Tofacitinib 10mg	contrast (X)	0.382	0.936	HR	1.202	0.21	0.796	1.816
CST3.Olink	Tier 3	A.1.bl Tofacitinib 5mg	contrast (X)	0.953	0.998	HR	1.019	0.32	0.544	1.909
CST3.Olink	Tier 3	A.1.bl TNFi	contrast (X)	0.087	0.361	HR	1.486	0.232	0.943	2.342
CST3.Olink	Tier 3	A.0.12m Overall, possible interaction	ANOVA	0.054	0.256	NA
CST3.Olink	Tier 3	A.1.12m Overall, no interaction	contrast (X)	0.015	0.273	HR	1.477	0.16	1.079	2.021
CST3.Olink	Tier 3	A.1.12m Tofacitinib 10mg	contrast (X)	0.044	0.799	HR	1.669	0.255	1.013	2.749
CST3.Olink	Tier 3	A.1.12m Tofacitinib 5mg	contrast (X)	0.185	0.676	HR	1.309	0.203	0.879	1.949
CST3.Olink	Tier 3	A.1.12m TNFi	contrast (X)	0.429	0.746	HR	1.229	0.261	0.737	2.048
CST3.Olink	Tier 3	B.0.bl Overall	interaction	0.521	0.735	NA
CST3.Olink	Tier 3	B.1.bl Tofacitinib 10mg vs TNFi	contrast (X)	0.499	0.845	HR	0.809	0.314	0.437	1.498
CST3.Olink	Tier 3	B.1.bl Tofacitinib 5mg vs TNFi	contrast (X)	0.342	0.673	HR	0.686	0.397	0.315	1.493
CST3.Olink	Tier 3	B.0.12m Overall	interaction	0.661	0.886	NA
CST3.Olink	Tier 3	B.1.12m Tofacitinib 10mg vs TNFi	contrast (X)	0.399	0.924	HR	1.358	0.363	0.667	2.765
CST3.Olink	Tier 3	B.1.12m Tofacitinib 5mg vs TNFi	contrast (X)	0.848	0.939	HR	1.065	0.329	0.559	2.031
CST3.Olink	Tier 3	C.0 Overall	ANOVA	0.301	0.688	NA
CST3.Olink	Tier 3	C.1.all Tofacitinib 10mg vs TNFi	contrast (Arm)	0.223	0.763	DeltaLog	0.088	0.072	-0.054	0.23
CST3.Olink	Tier 3	C.1.all Tofacitinib 5mg vs TNFi	contrast (Arm)	0.543	0.73	DeltaLog	0.051	0.084	-0.113	0.215
CST3.Olink	Tier 3	C.2.ctrl Tofacitinib 10mg vs TNFi	contrast (Arm)	0.094	0.659	DeltaLog	0.134	0.08	-0.023	0.291
CST3.Olink	Tier 3	C.2.ctrl Tofacitinib 5mg vs TNFi	contrast (Arm)	0.185	0.532	DeltaLog	0.123	0.093	-0.059	0.305
CST3.Olink	Tier 3	C.3.case Tofacitinib 10mg vs TNFi	contrast (Arm)	0.479	0.788	DeltaLog	-0.116	0.165	-0.439	0.206
CST3.Olink	Tier 3	C.3.case Tofacitinib 5mg vs TNFi	contrast (Arm)	0.172	0.789	DeltaLog	-0.258	0.189	-0.627	0.112
CST3.Olink	Tier 3	D.0 Overall	ANOVA	0.044	0.197	NA
CST3.Olink	Tier 3	D.1.all Tofacitinib 10mg vs TNFi	contrast (Arm)	0.028	0.079	DeltaLog	-0.162	0.074	-0.306	-0.018
CST3.Olink	Tier 3	D.1.all Tofacitinib 5mg vs TNFi	contrast (Arm)	0.855	0.916	DeltaLog	-0.016	0.085	-0.183	0.152
CST3.Olink	Tier 3	D.2.ctrl Tofacitinib 10mg vs TNFi	contrast (Arm)	0.008	0.038	DeltaLog	-0.208	0.078	-0.361	-0.055
CST3.Olink	Tier 3	D.2.ctrl Tofacitinib 5mg vs TNFi	contrast (Arm)	0.713	0.834	DeltaLog	-0.033	0.091	-0.211	0.144
CST3.Olink	Tier 3	D.3.case Tofacitinib 10mg vs TNFi	contrast (Arm)	0.476	0.907	DeltaLog	0.149	0.21	-0.261	0.56
CST3.Olink	Tier 3	D.3.case Tofacitinib 5mg vs TNFi	contrast (Arm)	0.652	0.891	DeltaLog	0.109	0.241	-0.364	0.581
CST3.Olink	Tier 3	E.0 Overall	ANOVA	0.006	0.109	NA
CST3.Olink	Tier 3	E.1 Tofacitinib 10mg	contrast (CFB)	0.002	0.134	HR	2.679	0.317	1.44	4.983
CST3.Olink	Tier 3	E.1 Tofacitinib 5mg	contrast (CFB)	0.681	0.981	HR	1.096	0.222	0.709	1.694
CST3.Olink	Tier 3	E.1 TNFi	contrast (CFB)	0.469	0.89	HR	0.688	0.517	0.25	1.894
CST3.Olink	Tier 3	F.0 Overall	interaction	0.017	0.286	NA
CST3.Olink	Tier 3	F.1 Tofacitinib 10mg vs TNFi	contrast (CFB)	0.024	0.563	HR	3.895	0.601	1.2	12.637
CST3.Olink	Tier 3	F.1 Tofacitinib 5mg vs TNFi	contrast (CFB)	0.405	0.954	HR	1.593	0.559	0.533	4.765
CST3.Olink	Tier 3	G.0	contrast (Group)	0.357	0.875	DeltaLog	0.102	0.109	-0.117	0.32
CST3.Olink	Tier 3	G.1	contrast (Group)	0.79	0.998	DeltaLog	0.029	0.109	-0.194	0.253
CXCL1.Olink	Tier 3	A.0.bl Overall, possible interaction	ANOVA	0.496	0.576	NA
CXCL1.Olink	Tier 3	A.1.bl Overall, no interaction	contrast (X)	0.742	0.943	HR	0.959	0.127	0.747	1.23
CXCL1.Olink	Tier 3	A.1.bl Tofacitinib 10mg	contrast (X)	0.659	0.943	HR	0.935	0.152	0.694	1.259
CXCL1.Olink	Tier 3	A.1.bl Tofacitinib 5mg	contrast (X)	0.29	0.652	HR	1.257	0.216	0.823	1.921
CXCL1.Olink	Tier 3	A.1.bl TNFi	contrast (X)	0.38	0.637	HR	0.729	0.36	0.36	1.477
CXCL1.Olink	Tier 3	A.0.12m Overall, possible interaction	ANOVA	0.021	0.193	NA
CXCL1.Olink	Tier 3	A.1.12m Overall, no interaction	contrast (X)	0.369	0.906	HR	0.874	0.15	0.652	1.172
CXCL1.Olink	Tier 3	A.1.12m Tofacitinib 10mg	contrast (X)	0.827	0.992	HR	0.958	0.196	0.652	1.408
CXCL1.Olink	Tier 3	A.1.12m Tofacitinib 5mg	contrast (X)	0.542	0.875	HR	1.126	0.194	0.769	1.648
CXCL1.Olink	Tier 3	A.1.12m TNFi	contrast (X)	0.128	0.558	HR	0.295	0.801	0.061	1.418
CXCL1.Olink	Tier 3	B.0.bl Overall	interaction	0.323	0.654	NA
CXCL1.Olink	Tier 3	B.1.bl Tofacitinib 10mg vs TNFi	contrast (X)	0.525	0.845	HR	1.283	0.392	0.595	2.767
CXCL1.Olink	Tier 3	B.1.bl Tofacitinib 5mg vs TNFi	contrast (X)	0.194	0.561	HR	1.725	0.42	0.757	3.929
CXCL1.Olink	Tier 3	B.0.12m Overall	interaction	0.013	0.161	NA
CXCL1.Olink	Tier 3	B.1.12m Tofacitinib 10mg vs TNFi	contrast (X)	0.154	0.695	HR	3.248	0.827	0.642	16.427
CXCL1.Olink	Tier 3	B.1.12m Tofacitinib 5mg vs TNFi	contrast (X)	0.105	0.522	HR	3.817	0.825	0.757	19.247
CXCL1.Olink	Tier 3	C.0 Overall	ANOVA	0.697	0.85	NA
CXCL1.Olink	Tier 3	C.1.all Tofacitinib 10mg vs TNFi	contrast (Arm)	0.771	0.941	DeltaLog	-0.059	0.201	-0.453	0.336
CXCL1.Olink	Tier 3	C.1.all Tofacitinib 5mg vs TNFi	contrast (Arm)	0.528	0.73	DeltaLog	-0.145	0.23	-0.596	0.306
CXCL1.Olink	Tier 3	C.2.ctrl Tofacitinib 10mg vs TNFi	contrast (Arm)	0.568	0.886	DeltaLog	-0.129	0.226	-0.572	0.314
CXCL1.Olink	Tier 3	C.2.ctrl Tofacitinib 5mg vs TNFi	contrast (Arm)	0.245	0.552	DeltaLog	-0.3	0.258	-0.807	0.206
CXCL1.Olink	Tier 3	C.3.case Tofacitinib 10mg vs TNFi	contrast (Arm)	0.617	0.788	DeltaLog	0.225	0.449	-0.656	1.105
CXCL1.Olink	Tier 3	C.3.case Tofacitinib 5mg vs TNFi	contrast (Arm)	0.363	0.815	DeltaLog	0.466	0.512	-0.538	1.47
CXCL1.Olink	Tier 3	D.0 Overall	ANOVA	0.221	0.478	NA
CXCL1.Olink	Tier 3	D.1.all Tofacitinib 10mg vs TNFi	contrast (Arm)	0.958	0.98	DeltaLog	-0.011	0.212	-0.427	0.404
CXCL1.Olink	Tier 3	D.1.all Tofacitinib 5mg vs TNFi	contrast (Arm)	0.292	0.608	DeltaLog	0.254	0.241	-0.218	0.726
CXCL1.Olink	Tier 3	D.2.ctrl Tofacitinib 10mg vs TNFi	contrast (Arm)	0.558	0.715	DeltaLog	-0.132	0.226	-0.576	0.311
CXCL1.Olink	Tier 3	D.2.ctrl Tofacitinib 5mg vs TNFi	contrast (Arm)	0.733	0.837	DeltaLog	0.088	0.258	-0.417	0.594
CXCL1.Olink	Tier 3	D.3.case Tofacitinib 10mg vs TNFi	contrast (Arm)	0.123	0.884	DeltaLog	0.928	0.602	-0.252	2.108
CXCL1.Olink	Tier 3	D.3.case Tofacitinib 5mg vs TNFi	contrast (Arm)	0.033	0.4	DeltaLog	1.438	0.673	0.119	2.757
CXCL1.Olink	Tier 3	E.0 Overall	ANOVA	0.014	0.197	NA
CXCL1.Olink	Tier 3	E.1 Tofacitinib 10mg	contrast (CFB)	0.874	0.944	HR	0.964	0.231	0.613	1.516
CXCL1.Olink	Tier 3	E.1 Tofacitinib 5mg	contrast (CFB)	0.622	0.981	HR	1.186	0.347	0.601	2.341
CXCL1.Olink	Tier 3	E.1 TNFi	contrast (CFB)	0.172	0.89	HR	0.238	1.054	0.03	1.873
CXCL1.Olink	Tier 3	F.0 Overall	interaction	0.009	0.277	NA
CXCL1.Olink	Tier 3	F.1 Tofacitinib 10mg vs TNFi	contrast (CFB)	0.195	0.765	HR	4.058	1.082	0.487	33.825
CXCL1.Olink	Tier 3	F.1 Tofacitinib 5mg vs TNFi	contrast (CFB)	0.147	0.954	HR	4.995	1.11	0.567	43.974
CXCL1.Olink	Tier 3	G.0	contrast (Group)	0.863	0.946	DeltaLog	0.058	0.334	-0.612	0.727
CXCL1.Olink	Tier 3	G.1	contrast (Group)	0.32	0.63	DeltaLog	-0.375	0.37	-1.132	0.382
CXCL16.Olink	Tier 3	A.0.bl Overall, possible interaction	ANOVA	0.127	0.355	NA
CXCL16.Olink	Tier 3	A.1.bl Overall, no interaction	contrast (X)	0.163	0.51	HR	1.254	0.162	0.912	1.724
CXCL16.Olink	Tier 3	A.1.bl Tofacitinib 10mg	contrast (X)	0.9	0.991	HR	1.028	0.224	0.664	1.594
CXCL16.Olink	Tier 3	A.1.bl Tofacitinib 5mg	contrast (X)	0.199	0.623	HR	1.422	0.274	0.831	2.433
CXCL16.Olink	Tier 3	A.1.bl TNFi	contrast (X)	0.149	0.429	HR	1.778	0.399	0.814	3.884
CXCL16.Olink	Tier 3	A.0.12m Overall, possible interaction	ANOVA	0.134	0.37	NA
CXCL16.Olink	Tier 3	A.1.12m Overall, no interaction	contrast (X)	0.083	0.582	HR	1.363	0.178	0.961	1.933
CXCL16.Olink	Tier 3	A.1.12m Tofacitinib 10mg	contrast (X)	0.405	0.992	HR	1.198	0.217	0.782	1.835
CXCL16.Olink	Tier 3	A.1.12m Tofacitinib 5mg	contrast (X)	0.114	0.63	HR	1.658	0.32	0.886	3.102
CXCL16.Olink	Tier 3	A.1.12m TNFi	contrast (X)	0.417	0.746	HR	1.628	0.601	0.501	5.287
CXCL16.Olink	Tier 3	B.0.bl Overall	interaction	0.263	0.654	NA
CXCL16.Olink	Tier 3	B.1.bl Tofacitinib 10mg vs TNFi	contrast (X)	0.233	0.761	HR	0.578	0.459	0.235	1.421
CXCL16.Olink	Tier 3	B.1.bl Tofacitinib 5mg vs TNFi	contrast (X)	0.645	0.885	HR	0.8	0.486	0.309	2.072
CXCL16.Olink	Tier 3	B.0.12m Overall	interaction	0.567	0.885	NA
CXCL16.Olink	Tier 3	B.1.12m Tofacitinib 10mg vs TNFi	contrast (X)	0.632	0.924	HR	0.736	0.639	0.21	2.575
CXCL16.Olink	Tier 3	B.1.12m Tofacitinib 5mg vs TNFi	contrast (X)	0.979	0.997	HR	1.018	0.68	0.268	3.864
CXCL16.Olink	Tier 3	C.0 Overall	ANOVA	0.655	0.833	NA
CXCL16.Olink	Tier 3	C.1.all Tofacitinib 10mg vs TNFi	contrast (Arm)	0.732	0.941	DeltaLog	-0.018	0.054	-0.123	0.087
CXCL16.Olink	Tier 3	C.1.all Tofacitinib 5mg vs TNFi	contrast (Arm)	0.597	0.73	DeltaLog	-0.033	0.062	-0.155	0.089
CXCL16.Olink	Tier 3	C.2.ctrl Tofacitinib 10mg vs TNFi	contrast (Arm)	0.819	0.973	DeltaLog	0.014	0.06	-0.103	0.131
CXCL16.Olink	Tier 3	C.2.ctrl Tofacitinib 5mg vs TNFi	contrast (Arm)	0.649	0.792	DeltaLog	-0.031	0.069	-0.167	0.104
CXCL16.Olink	Tier 3	C.3.case Tofacitinib 10mg vs TNFi	contrast (Arm)	0.209	0.627	DeltaLog	-0.152	0.121	-0.388	0.085
CXCL16.Olink	Tier 3	C.3.case Tofacitinib 5mg vs TNFi	contrast (Arm)	0.745	0.909	DeltaLog	-0.045	0.139	-0.318	0.227
CXCL16.Olink	Tier 3	D.0 Overall	ANOVA	2.86e-05	0.000344	NA
CXCL16.Olink	Tier 3	D.1.all Tofacitinib 10mg vs TNFi	contrast (Arm)	3.09e-07	4.44e-06	DeltaLog	0.265	0.052	0.163	0.366
CXCL16.Olink	Tier 3	D.1.all Tofacitinib 5mg vs TNFi	contrast (Arm)	0.000643	0.008	DeltaLog	0.207	0.061	0.088	0.325
CXCL16.Olink	Tier 3	D.2.ctrl Tofacitinib 10mg vs TNFi	contrast (Arm)	2.84e-06	2.92e-05	DeltaLog	0.261	0.056	0.152	0.37
CXCL16.Olink	Tier 3	D.2.ctrl Tofacitinib 5mg vs TNFi	contrast (Arm)	0.002	0.026	DeltaLog	0.2	0.065	0.072	0.328
CXCL16.Olink	Tier 3	D.3.case Tofacitinib 10mg vs TNFi	contrast (Arm)	0.047	0.704	DeltaLog	0.286	0.144	0.004	0.567
CXCL16.Olink	Tier 3	D.3.case Tofacitinib 5mg vs TNFi	contrast (Arm)	0.143	0.475	DeltaLog	0.247	0.169	-0.084	0.578
CXCL16.Olink	Tier 3	E.0 Overall	ANOVA	0.874	0.979	NA
CXCL16.Olink	Tier 3	E.1 Tofacitinib 10mg	contrast (CFB)	0.516	0.944	HR	1.141	0.203	0.767	1.699
CXCL16.Olink	Tier 3	E.1 Tofacitinib 5mg	contrast (CFB)	0.92	0.981	HR	1.065	0.63	0.31	3.661
CXCL16.Olink	Tier 3	E.1 TNFi	contrast (CFB)	0.655	0.89	HR	1.252	0.505	0.466	3.367
CXCL16.Olink	Tier 3	F.0 Overall	interaction	0.958	0.979	NA
CXCL16.Olink	Tier 3	F.1 Tofacitinib 10mg vs TNFi	contrast (CFB)	0.864	0.928	HR	0.911	0.546	0.313	2.654
CXCL16.Olink	Tier 3	F.1 Tofacitinib 5mg vs TNFi	contrast (CFB)	0.841	0.954	HR	0.85	0.807	0.175	4.136
CXCL16.Olink	Tier 3	G.0	contrast (Group)	0.745	0.931	DeltaLog	0.025	0.077	-0.129	0.179
CXCL16.Olink	Tier 3	G.1	contrast (Group)	0.000948	0.022	DeltaLog	0.342	0.094	0.15	0.534
EGFR.Olink	Tier 3	A.0.bl Overall, possible interaction	ANOVA	0.108	0.339	NA
EGFR.Olink	Tier 3	A.1.bl Overall, no interaction	contrast (X)	0.581	0.926	HR	1.084	0.146	0.815	1.442
EGFR.Olink	Tier 3	A.1.bl Tofacitinib 10mg	contrast (X)	0.635	0.943	HR	1.102	0.205	0.738	1.647
EGFR.Olink	Tier 3	A.1.bl Tofacitinib 5mg	contrast (X)	0.103	0.587	HR	1.508	0.252	0.92	2.472
EGFR.Olink	Tier 3	A.1.bl TNFi	contrast (X)	0.193	0.456	HR	0.62	0.367	0.302	1.273
EGFR.Olink	Tier 3	A.0.12m Overall, possible interaction	ANOVA	0.518	0.851	NA
EGFR.Olink	Tier 3	A.1.12m Overall, no interaction	contrast (X)	0.536	0.906	HR	0.905	0.161	0.661	1.241
EGFR.Olink	Tier 3	A.1.12m Tofacitinib 10mg	contrast (X)	0.536	0.992	HR	0.889	0.189	0.614	1.289
EGFR.Olink	Tier 3	A.1.12m Tofacitinib 5mg	contrast (X)	0.644	0.875	HR	1.171	0.343	0.599	2.293
EGFR.Olink	Tier 3	A.1.12m TNFi	contrast (X)	0.292	0.678	HR	0.607	0.474	0.24	1.537
EGFR.Olink	Tier 3	B.0.bl Overall	interaction	0.059	0.437	NA
EGFR.Olink	Tier 3	B.1.bl Tofacitinib 10mg vs TNFi	contrast (X)	0.172	0.761	HR	1.778	0.421	0.779	4.056
EGFR.Olink	Tier 3	B.1.bl Tofacitinib 5mg vs TNFi	contrast (X)	0.046	0.433	HR	2.432	0.445	1.016	5.821
EGFR.Olink	Tier 3	B.0.12m Overall	interaction	0.404	0.849	NA
EGFR.Olink	Tier 3	B.1.12m Tofacitinib 10mg vs TNFi	contrast (X)	0.454	0.924	HR	1.465	0.51	0.539	3.985
EGFR.Olink	Tier 3	B.1.12m Tofacitinib 5mg vs TNFi	contrast (X)	0.263	0.751	HR	1.93	0.587	0.611	6.098
EGFR.Olink	Tier 3	C.0 Overall	ANOVA	0.061	0.522	NA
EGFR.Olink	Tier 3	C.1.all Tofacitinib 10mg vs TNFi	contrast (Arm)	0.059	0.602	DeltaLog	-0.067	0.036	-0.137	0.003
EGFR.Olink	Tier 3	C.1.all Tofacitinib 5mg vs TNFi	contrast (Arm)	0.062	0.343	DeltaLog	-0.077	0.041	-0.158	0.004
EGFR.Olink	Tier 3	C.2.ctrl Tofacitinib 10mg vs TNFi	contrast (Arm)	0.017	0.408	DeltaLog	-0.094	0.04	-0.172	-0.017
EGFR.Olink	Tier 3	C.2.ctrl Tofacitinib 5mg vs TNFi	contrast (Arm)	0.009	0.17	DeltaLog	-0.119	0.046	-0.209	-0.03
EGFR.Olink	Tier 3	C.3.case Tofacitinib 10mg vs TNFi	contrast (Arm)	0.572	0.788	DeltaLog	0.045	0.08	-0.111	0.202
EGFR.Olink	Tier 3	C.3.case Tofacitinib 5mg vs TNFi	contrast (Arm)	0.3	0.789	DeltaLog	0.095	0.092	-0.085	0.276
EGFR.Olink	Tier 3	D.0 Overall	ANOVA	0.182	0.468	NA
EGFR.Olink	Tier 3	D.1.all Tofacitinib 10mg vs TNFi	contrast (Arm)	0.024	0.074	DeltaLog	0.081	0.036	0.011	0.151
EGFR.Olink	Tier 3	D.1.all Tofacitinib 5mg vs TNFi	contrast (Arm)	0.475	0.687	DeltaLog	0.03	0.042	-0.052	0.112
EGFR.Olink	Tier 3	D.2.ctrl Tofacitinib 10mg vs TNFi	contrast (Arm)	0.044	0.128	DeltaLog	0.078	0.039	0.002	0.153
EGFR.Olink	Tier 3	D.2.ctrl Tofacitinib 5mg vs TNFi	contrast (Arm)	0.683	0.834	DeltaLog	0.018	0.045	-0.07	0.107
EGFR.Olink	Tier 3	D.3.case Tofacitinib 10mg vs TNFi	contrast (Arm)	0.291	0.892	DeltaLog	0.104	0.098	-0.089	0.296
EGFR.Olink	Tier 3	D.3.case Tofacitinib 5mg vs TNFi	contrast (Arm)	0.362	0.669	DeltaLog	0.105	0.116	-0.121	0.332
EGFR.Olink	Tier 3	E.0 Overall	ANOVA	0.551	0.869	NA
EGFR.Olink	Tier 3	E.1 Tofacitinib 10mg	contrast (CFB)	0.391	0.944	HR	0.861	0.174	0.613	1.211
EGFR.Olink	Tier 3	E.1 Tofacitinib 5mg	contrast (CFB)	0.904	0.981	HR	0.925	0.642	0.263	3.258
EGFR.Olink	Tier 3	E.1 TNFi	contrast (CFB)	0.345	0.89	HR	0.61	0.523	0.219	1.699
EGFR.Olink	Tier 3	F.0 Overall	interaction	0.706	0.92	NA
EGFR.Olink	Tier 3	F.1 Tofacitinib 10mg vs TNFi	contrast (CFB)	0.532	0.928	HR	1.412	0.551	0.479	4.16
EGFR.Olink	Tier 3	F.1 Tofacitinib 5mg vs TNFi	contrast (CFB)	0.615	0.954	HR	1.516	0.828	0.299	7.687
EGFR.Olink	Tier 3	G.0	contrast (Group)	0.738	0.931	DeltaLog	-0.016	0.049	-0.114	0.081
EGFR.Olink	Tier 3	G.1	contrast (Group)	0.126	0.417	DeltaLog	0.089	0.056	-0.026	0.203
F11.Olink	Tier 3	A.0.bl Overall, possible interaction	ANOVA	0.419	0.566	NA
F11.Olink	Tier 3	A.1.bl Overall, no interaction	contrast (X)	0.204	0.569	HR	1.236	0.167	0.891	1.714
F11.Olink	Tier 3	A.1.bl Tofacitinib 10mg	contrast (X)	0.597	0.943	HR	1.161	0.283	0.667	2.02
F11.Olink	Tier 3	A.1.bl Tofacitinib 5mg	contrast (X)	0.259	0.652	HR	1.275	0.215	0.836	1.946
F11.Olink	Tier 3	A.1.bl TNFi	contrast (X)	0.419	0.671	HR	1.333	0.356	0.663	2.681
F11.Olink	Tier 3	A.0.12m Overall, possible interaction	ANOVA	0.097	0.332	NA
F11.Olink	Tier 3	A.1.12m Overall, no interaction	contrast (X)	0.195	0.779	HR	1.284	0.193	0.88	1.874
F11.Olink	Tier 3	A.1.12m Tofacitinib 10mg	contrast (X)	0.652	0.992	HR	1.112	0.235	0.701	1.764
F11.Olink	Tier 3	A.1.12m Tofacitinib 5mg	contrast (X)	0.044	0.455	HR	2.511	0.457	1.024	6.154
F11.Olink	Tier 3	A.1.12m TNFi	contrast (X)	0.716	0.927	HR	1.164	0.418	0.513	2.64
F11.Olink	Tier 3	B.0.bl Overall	interaction	0.904	0.946	NA
F11.Olink	Tier 3	B.1.bl Tofacitinib 10mg vs TNFi	contrast (X)	0.761	0.926	HR	0.871	0.456	0.356	2.127
F11.Olink	Tier 3	B.1.bl Tofacitinib 5mg vs TNFi	contrast (X)	0.915	0.969	HR	0.956	0.419	0.421	2.173
F11.Olink	Tier 3	B.0.12m Overall	interaction	0.166	0.546	NA
F11.Olink	Tier 3	B.1.12m Tofacitinib 10mg vs TNFi	contrast (X)	0.924	0.985	HR	0.955	0.48	0.373	2.447
F11.Olink	Tier 3	B.1.12m Tofacitinib 5mg vs TNFi	contrast (X)	0.214	0.643	HR	2.157	0.619	0.641	7.256
F11.Olink	Tier 3	C.0 Overall	ANOVA	0.461	0.787	NA
F11.Olink	Tier 3	C.1.all Tofacitinib 10mg vs TNFi	contrast (Arm)	0.718	0.941	DeltaLog	-0.019	0.051	-0.119	0.082
F11.Olink	Tier 3	C.1.all Tofacitinib 5mg vs TNFi	contrast (Arm)	0.223	0.697	DeltaLog	0.072	0.059	-0.044	0.189
F11.Olink	Tier 3	C.2.ctrl Tofacitinib 10mg vs TNFi	contrast (Arm)	0.908	0.973	DeltaLog	-0.007	0.057	-0.119	0.106
F11.Olink	Tier 3	C.2.ctrl Tofacitinib 5mg vs TNFi	contrast (Arm)	0.252	0.552	DeltaLog	0.076	0.066	-0.054	0.206
F11.Olink	Tier 3	C.3.case Tofacitinib 10mg vs TNFi	contrast (Arm)	0.534	0.788	DeltaLog	-0.073	0.118	-0.304	0.158
F11.Olink	Tier 3	C.3.case Tofacitinib 5mg vs TNFi	contrast (Arm)	0.708	0.894	DeltaLog	0.051	0.135	-0.214	0.315
F11.Olink	Tier 3	D.0 Overall	ANOVA	0.412	0.689	NA
F11.Olink	Tier 3	D.1.all Tofacitinib 10mg vs TNFi	contrast (Arm)	0.262	0.471	DeltaLog	0.06	0.053	-0.045	0.164
F11.Olink	Tier 3	D.1.all Tofacitinib 5mg vs TNFi	contrast (Arm)	0.087	0.298	DeltaLog	0.106	0.062	-0.015	0.227
F11.Olink	Tier 3	D.2.ctrl Tofacitinib 10mg vs TNFi	contrast (Arm)	0.328	0.522	DeltaLog	0.055	0.057	-0.056	0.166
F11.Olink	Tier 3	D.2.ctrl Tofacitinib 5mg vs TNFi	contrast (Arm)	0.205	0.609	DeltaLog	0.084	0.066	-0.046	0.213
F11.Olink	Tier 3	D.3.case Tofacitinib 10mg vs TNFi	contrast (Arm)	0.583	0.907	DeltaLog	0.084	0.152	-0.215	0.383
F11.Olink	Tier 3	D.3.case Tofacitinib 5mg vs TNFi	contrast (Arm)	0.148	0.475	DeltaLog	0.254	0.175	-0.09	0.597
F11.Olink	Tier 3	E.0 Overall	ANOVA	0.077	0.369	NA
F11.Olink	Tier 3	E.1 Tofacitinib 10mg	contrast (CFB)	0.233	0.939	HR	1.299	0.219	0.845	1.995
F11.Olink	Tier 3	E.1 Tofacitinib 5mg	contrast (CFB)	0.114	0.981	HR	2.914	0.677	0.773	10.984
F11.Olink	Tier 3	E.1 TNFi	contrast (CFB)	0.64	0.89	HR	1.215	0.417	0.536	2.754
F11.Olink	Tier 3	F.0 Overall	interaction	0.273	0.703	NA
F11.Olink	Tier 3	F.1 Tofacitinib 10mg vs TNFi	contrast (CFB)	0.889	0.928	HR	1.068	0.473	0.423	2.7
F11.Olink	Tier 3	F.1 Tofacitinib 5mg vs TNFi	contrast (CFB)	0.272	0.954	HR	2.398	0.795	0.504	11.401
F11.Olink	Tier 3	G.0	contrast (Group)	0.748	0.931	DeltaLog	0.027	0.084	-0.141	0.195
F11.Olink	Tier 3	G.1	contrast (Group)	0.129	0.417	DeltaLog	0.134	0.086	-0.041	0.309
F7.Olink	Tier 3	A.0.bl Overall, possible interaction	ANOVA	0.609	0.696	NA
F7.Olink	Tier 3	A.1.bl Overall, no interaction	contrast (X)	0.457	0.889	HR	1.107	0.137	0.847	1.448
F7.Olink	Tier 3	A.1.bl Tofacitinib 10mg	contrast (X)	0.929	0.991	HR	1.015	0.169	0.729	1.413
F7.Olink	Tier 3	A.1.bl Tofacitinib 5mg	contrast (X)	0.371	0.685	HR	1.422	0.394	0.657	3.077
F7.Olink	Tier 3	A.1.bl TNFi	contrast (X)	0.557	0.818	HR	1.167	0.263	0.697	1.954
F7.Olink	Tier 3	A.0.12m Overall, possible interaction	ANOVA	0.044	0.24	NA
F7.Olink	Tier 3	A.1.12m Overall, no interaction	contrast (X)	0.11	0.582	HR	1.298	0.163	0.943	1.787
F7.Olink	Tier 3	A.1.12m Tofacitinib 10mg	contrast (X)	0.567	0.992	HR	1.101	0.168	0.792	1.53
F7.Olink	Tier 3	A.1.12m Tofacitinib 5mg	contrast (X)	0.063	0.455	HR	2.566	0.507	0.95	6.936
F7.Olink	Tier 3	A.1.12m TNFi	contrast (X)	0.634	0.927	HR	1.121	0.241	0.699	1.799
F7.Olink	Tier 3	B.0.bl Overall	interaction	0.566	0.744	NA
F7.Olink	Tier 3	B.1.bl Tofacitinib 10mg vs TNFi	contrast (X)	0.655	0.907	HR	0.87	0.312	0.472	1.603
F7.Olink	Tier 3	B.1.bl Tofacitinib 5mg vs TNFi	contrast (X)	0.676	0.885	HR	1.219	0.473	0.482	3.081
F7.Olink	Tier 3	B.0.12m Overall	interaction	0.086	0.425	NA
F7.Olink	Tier 3	B.1.12m Tofacitinib 10mg vs TNFi	contrast (X)	0.95	0.985	HR	0.982	0.295	0.551	1.75
F7.Olink	Tier 3	B.1.12m Tofacitinib 5mg vs TNFi	contrast (X)	0.14	0.522	HR	2.288	0.561	0.762	6.871
F7.Olink	Tier 3	C.0 Overall	ANOVA	0.952	0.952	NA
F7.Olink	Tier 3	C.1.all Tofacitinib 10mg vs TNFi	contrast (Arm)	0.642	0.941	DeltaLog	-0.026	0.057	-0.138	0.085
F7.Olink	Tier 3	C.1.all Tofacitinib 5mg vs TNFi	contrast (Arm)	0.874	0.899	DeltaLog	-0.01	0.066	-0.139	0.118
F7.Olink	Tier 3	C.2.ctrl Tofacitinib 10mg vs TNFi	contrast (Arm)	0.752	0.937	DeltaLog	-0.02	0.063	-0.144	0.104
F7.Olink	Tier 3	C.2.ctrl Tofacitinib 5mg vs TNFi	contrast (Arm)	0.756	0.851	DeltaLog	-0.023	0.074	-0.167	0.121
F7.Olink	Tier 3	C.3.case Tofacitinib 10mg vs TNFi	contrast (Arm)	0.675	0.788	DeltaLog	-0.055	0.13	-0.31	0.201
F7.Olink	Tier 3	C.3.case Tofacitinib 5mg vs TNFi	contrast (Arm)	0.813	0.919	DeltaLog	0.035	0.15	-0.258	0.328
F7.Olink	Tier 3	D.0 Overall	ANOVA	0.703	0.843	NA
F7.Olink	Tier 3	D.1.all Tofacitinib 10mg vs TNFi	contrast (Arm)	0.47	0.669	DeltaLog	0.045	0.062	-0.077	0.166
F7.Olink	Tier 3	D.1.all Tofacitinib 5mg vs TNFi	contrast (Arm)	0.184	0.464	DeltaLog	0.095	0.072	-0.045	0.236
F7.Olink	Tier 3	D.2.ctrl Tofacitinib 10mg vs TNFi	contrast (Arm)	0.508	0.689	DeltaLog	0.044	0.066	-0.086	0.174
F7.Olink	Tier 3	D.2.ctrl Tofacitinib 5mg vs TNFi	contrast (Arm)	0.3	0.655	DeltaLog	0.08	0.077	-0.071	0.23
F7.Olink	Tier 3	D.3.case Tofacitinib 10mg vs TNFi	contrast (Arm)	0.806	0.947	DeltaLog	0.044	0.178	-0.304	0.392
F7.Olink	Tier 3	D.3.case Tofacitinib 5mg vs TNFi	contrast (Arm)	0.339	0.669	DeltaLog	0.196	0.205	-0.206	0.598
F7.Olink	Tier 3	E.0 Overall	ANOVA	0.473	0.848	NA
F7.Olink	Tier 3	E.1 Tofacitinib 10mg	contrast (CFB)	0.568	0.944	HR	1.119	0.198	0.76	1.649
F7.Olink	Tier 3	E.1 Tofacitinib 5mg	contrast (CFB)	0.337	0.981	HR	1.72	0.564	0.569	5.2
F7.Olink	Tier 3	E.1 TNFi	contrast (CFB)	0.57	0.89	HR	1.162	0.265	0.692	1.952
F7.Olink	Tier 3	F.0 Overall	interaction	0.624	0.92	NA
F7.Olink	Tier 3	F.1 Tofacitinib 10mg vs TNFi	contrast (CFB)	0.91	0.928	HR	0.963	0.332	0.503	1.845
F7.Olink	Tier 3	F.1 Tofacitinib 5mg vs TNFi	contrast (CFB)	0.529	0.954	HR	1.48	0.622	0.437	5.012
F7.Olink	Tier 3	G.0	contrast (Group)	0.704	0.931	DeltaLog	0.036	0.095	-0.154	0.227
F7.Olink	Tier 3	G.1	contrast (Group)	0.176	0.502	DeltaLog	0.131	0.094	-0.062	0.324
Gal-3.Olink	Tier 3	A.0.bl Overall, possible interaction	ANOVA	0.988	0.988	NA
Gal-3.Olink	Tier 3	A.1.bl Overall, no interaction	contrast (X)	0.775	0.943	HR	1.042	0.146	0.784	1.387
Gal-3.Olink	Tier 3	A.1.bl Tofacitinib 10mg	contrast (X)	0.811	0.954	HR	1.052	0.211	0.695	1.591
Gal-3.Olink	Tier 3	A.1.bl Tofacitinib 5mg	contrast (X)	0.985	0.998	HR	1.006	0.306	0.553	1.831
Gal-3.Olink	Tier 3	A.1.bl TNFi	contrast (X)	0.807	0.894	HR	1.055	0.218	0.689	1.615
Gal-3.Olink	Tier 3	A.0.12m Overall, possible interaction	ANOVA	0.367	0.722	NA
Gal-3.Olink	Tier 3	A.1.12m Overall, no interaction	contrast (X)	0.347	0.906	HR	1.136	0.136	0.87	1.483
Gal-3.Olink	Tier 3	A.1.12m Tofacitinib 10mg	contrast (X)	0.854	0.992	HR	0.974	0.144	0.735	1.291
Gal-3.Olink	Tier 3	A.1.12m Tofacitinib 5mg	contrast (X)	0.056	0.455	HR	1.583	0.24	0.988	2.535
Gal-3.Olink	Tier 3	A.1.12m TNFi	contrast (X)	0.81	0.927	HR	1.086	0.342	0.556	2.122
Gal-3.Olink	Tier 3	B.0.bl Overall	interaction	0.989	0.989	NA
Gal-3.Olink	Tier 3	B.1.bl Tofacitinib 10mg vs TNFi	contrast (X)	0.993	0.998	HR	0.997	0.304	0.55	1.808
Gal-3.Olink	Tier 3	B.1.bl Tofacitinib 5mg vs TNFi	contrast (X)	0.899	0.969	HR	0.954	0.372	0.46	1.977
Gal-3.Olink	Tier 3	B.0.12m Overall	interaction	0.297	0.757	NA
Gal-3.Olink	Tier 3	B.1.12m Tofacitinib 10mg vs TNFi	contrast (X)	0.769	0.939	HR	0.897	0.37	0.435	1.851
Gal-3.Olink	Tier 3	B.1.12m Tofacitinib 5mg vs TNFi	contrast (X)	0.36	0.808	HR	1.458	0.412	0.65	3.271
Gal-3.Olink	Tier 3	C.0 Overall	ANOVA	0.645	0.833	NA
Gal-3.Olink	Tier 3	C.1.all Tofacitinib 10mg vs TNFi	contrast (Arm)	0.14	0.75	DeltaLog	-0.092	0.063	-0.215	0.03
Gal-3.Olink	Tier 3	C.1.all Tofacitinib 5mg vs TNFi	contrast (Arm)	0.212	0.697	DeltaLog	-0.091	0.073	-0.233	0.052
Gal-3.Olink	Tier 3	C.2.ctrl Tofacitinib 10mg vs TNFi	contrast (Arm)	0.179	0.677	DeltaLog	-0.094	0.07	-0.232	0.043
Gal-3.Olink	Tier 3	C.2.ctrl Tofacitinib 5mg vs TNFi	contrast (Arm)	0.317	0.594	DeltaLog	-0.082	0.082	-0.241	0.078
Gal-3.Olink	Tier 3	C.3.case Tofacitinib 10mg vs TNFi	contrast (Arm)	0.551	0.788	DeltaLog	-0.085	0.142	-0.363	0.194
Gal-3.Olink	Tier 3	C.3.case Tofacitinib 5mg vs TNFi	contrast (Arm)	0.442	0.815	DeltaLog	-0.126	0.164	-0.447	0.195
Gal-3.Olink	Tier 3	D.0 Overall	ANOVA	0.831	0.921	NA
Gal-3.Olink	Tier 3	D.1.all Tofacitinib 10mg vs TNFi	contrast (Arm)	0.451	0.662	DeltaLog	0.043	0.057	-0.068	0.154
Gal-3.Olink	Tier 3	D.1.all Tofacitinib 5mg vs TNFi	contrast (Arm)	0.42	0.687	DeltaLog	0.053	0.066	-0.076	0.183
Gal-3.Olink	Tier 3	D.2.ctrl Tofacitinib 10mg vs TNFi	contrast (Arm)	0.522	0.689	DeltaLog	0.039	0.061	-0.08	0.158
Gal-3.Olink	Tier 3	D.2.ctrl Tofacitinib 5mg vs TNFi	contrast (Arm)	0.638	0.8	DeltaLog	0.033	0.071	-0.106	0.173
Gal-3.Olink	Tier 3	D.3.case Tofacitinib 10mg vs TNFi	contrast (Arm)	0.676	0.928	DeltaLog	0.065	0.156	-0.241	0.372
Gal-3.Olink	Tier 3	D.3.case Tofacitinib 5mg vs TNFi	contrast (Arm)	0.316	0.669	DeltaLog	0.184	0.183	-0.176	0.543
Gal-3.Olink	Tier 3	E.0 Overall	ANOVA	0.712	0.932	NA
Gal-3.Olink	Tier 3	E.1 Tofacitinib 10mg	contrast (CFB)	0.738	0.944	HR	1.053	0.155	0.778	1.426
Gal-3.Olink	Tier 3	E.1 Tofacitinib 5mg	contrast (CFB)	0.446	0.981	HR	1.387	0.43	0.598	3.22
Gal-3.Olink	Tier 3	E.1 TNFi	contrast (CFB)	0.869	0.977	HR	0.922	0.489	0.354	2.403
Gal-3.Olink	Tier 3	F.0 Overall	interaction	0.665	0.92	NA
Gal-3.Olink	Tier 3	F.1 Tofacitinib 10mg vs TNFi	contrast (CFB)	0.796	0.928	HR	1.142	0.513	0.417	3.123
Gal-3.Olink	Tier 3	F.1 Tofacitinib 5mg vs TNFi	contrast (CFB)	0.53	0.954	HR	1.504	0.65	0.42	5.382
Gal-3.Olink	Tier 3	G.0	contrast (Group)	0.445	0.875	DeltaLog	0.075	0.097	-0.12	0.269
Gal-3.Olink	Tier 3	G.1	contrast (Group)	0.217	0.522	DeltaLog	0.15	0.119	-0.093	0.393
GP1BA.Olink	Tier 3	A.0.bl Overall, possible interaction	ANOVA	0.182	0.381	NA
GP1BA.Olink	Tier 3	A.1.bl Overall, no interaction	contrast (X)	0.531	0.926	HR	1.097	0.148	0.821	1.467
GP1BA.Olink	Tier 3	A.1.bl Tofacitinib 10mg	contrast (X)	0.427	0.936	HR	1.18	0.208	0.784	1.775
GP1BA.Olink	Tier 3	A.1.bl Tofacitinib 5mg	contrast (X)	0.197	0.623	HR	1.358	0.238	0.853	2.164
GP1BA.Olink	Tier 3	A.1.bl TNFi	contrast (X)	0.139	0.417	HR	0.626	0.317	0.336	1.165
GP1BA.Olink	Tier 3	A.0.12m Overall, possible interaction	ANOVA	0.04	0.24	NA
GP1BA.Olink	Tier 3	A.1.12m Overall, no interaction	contrast (X)	0.109	0.582	HR	1.285	0.157	0.945	1.748
GP1BA.Olink	Tier 3	A.1.12m Tofacitinib 10mg	contrast (X)	0.098	0.992	HR	1.468	0.232	0.932	2.314
GP1BA.Olink	Tier 3	A.1.12m Tofacitinib 5mg	contrast (X)	0.08	0.524	HR	1.405	0.194	0.96	2.057
GP1BA.Olink	Tier 3	A.1.12m TNFi	contrast (X)	0.129	0.558	HR	0.661	0.272	0.388	1.128
GP1BA.Olink	Tier 3	B.0.bl Overall	interaction	0.115	0.487	NA
GP1BA.Olink	Tier 3	B.1.bl Tofacitinib 10mg vs TNFi	contrast (X)	0.095	0.761	HR	1.886	0.38	0.895	3.975
GP1BA.Olink	Tier 3	B.1.bl Tofacitinib 5mg vs TNFi	contrast (X)	0.05	0.433	HR	2.171	0.396	1	4.714
GP1BA.Olink	Tier 3	B.0.12m Overall	interaction	0.094	0.425	NA
GP1BA.Olink	Tier 3	B.1.12m Tofacitinib 10mg vs TNFi	contrast (X)	0.026	0.447	HR	2.221	0.358	1.101	4.482
GP1BA.Olink	Tier 3	B.1.12m Tofacitinib 5mg vs TNFi	contrast (X)	0.026	0.289	HR	2.126	0.338	1.097	4.12
GP1BA.Olink	Tier 3	C.0 Overall	ANOVA	0.145	0.522	NA
GP1BA.Olink	Tier 3	C.1.all Tofacitinib 10mg vs TNFi	contrast (Arm)	0.437	0.899	DeltaLog	-0.068	0.087	-0.238	0.103
GP1BA.Olink	Tier 3	C.1.all Tofacitinib 5mg vs TNFi	contrast (Arm)	0.087	0.418	DeltaLog	-0.172	0.101	-0.37	0.025
GP1BA.Olink	Tier 3	C.2.ctrl Tofacitinib 10mg vs TNFi	contrast (Arm)	0.149	0.677	DeltaLog	-0.14	0.097	-0.329	0.05
GP1BA.Olink	Tier 3	C.2.ctrl Tofacitinib 5mg vs TNFi	contrast (Arm)	0.02	0.17	DeltaLog	-0.26	0.112	-0.479	-0.04
GP1BA.Olink	Tier 3	C.3.case Tofacitinib 10mg vs TNFi	contrast (Arm)	0.231	0.665	DeltaLog	0.238	0.199	-0.151	0.628
GP1BA.Olink	Tier 3	C.3.case Tofacitinib 5mg vs TNFi	contrast (Arm)	0.398	0.815	DeltaLog	0.193	0.228	-0.254	0.639
GP1BA.Olink	Tier 3	D.0 Overall	ANOVA	0.224	0.478	NA
GP1BA.Olink	Tier 3	D.1.all Tofacitinib 10mg vs TNFi	contrast (Arm)	0.391	0.599	DeltaLog	0.082	0.096	-0.106	0.27
GP1BA.Olink	Tier 3	D.1.all Tofacitinib 5mg vs TNFi	contrast (Arm)	0.046	0.205	DeltaLog	0.224	0.112	0.004	0.443
GP1BA.Olink	Tier 3	D.2.ctrl Tofacitinib 10mg vs TNFi	contrast (Arm)	0.727	0.831	DeltaLog	0.036	0.102	-0.165	0.236
GP1BA.Olink	Tier 3	D.2.ctrl Tofacitinib 5mg vs TNFi	contrast (Arm)	0.126	0.505	DeltaLog	0.183	0.12	-0.052	0.417
GP1BA.Olink	Tier 3	D.3.case Tofacitinib 10mg vs TNFi	contrast (Arm)	0.147	0.884	DeltaLog	0.396	0.273	-0.14	0.932
GP1BA.Olink	Tier 3	D.3.case Tofacitinib 5mg vs TNFi	contrast (Arm)	0.118	0.475	DeltaLog	0.492	0.315	-0.125	1.109
GP1BA.Olink	Tier 3	E.0 Overall	ANOVA	0.132	0.397	NA
GP1BA.Olink	Tier 3	E.1 Tofacitinib 10mg	contrast (CFB)	0.113	0.814	HR	1.498	0.255	0.909	2.47
GP1BA.Olink	Tier 3	E.1 Tofacitinib 5mg	contrast (CFB)	0.343	0.981	HR	1.317	0.29	0.746	2.324
GP1BA.Olink	Tier 3	E.1 TNFi	contrast (CFB)	0.323	0.89	HR	0.746	0.297	0.417	1.334
GP1BA.Olink	Tier 3	F.0 Overall	interaction	0.23	0.68	NA
GP1BA.Olink	Tier 3	F.1 Tofacitinib 10mg vs TNFi	contrast (CFB)	0.078	0.563	HR	2.009	0.396	0.924	4.367
GP1BA.Olink	Tier 3	F.1 Tofacitinib 5mg vs TNFi	contrast (CFB)	0.175	0.954	HR	1.766	0.419	0.776	4.017
GP1BA.Olink	Tier 3	G.0	contrast (Group)	0.493	0.875	DeltaLog	0.104	0.151	-0.198	0.406
GP1BA.Olink	Tier 3	G.1	contrast (Group)	0.114	0.417	DeltaLog	0.238	0.146	-0.061	0.537
ICAM1.Olink	Tier 3	A.0.bl Overall, possible interaction	ANOVA	0.011	0.14	NA
ICAM1.Olink	Tier 3	A.1.bl Overall, no interaction	contrast (X)	0.031	0.372	HR	0.659	0.194	0.451	0.963
ICAM1.Olink	Tier 3	A.1.bl Tofacitinib 10mg	contrast (X)	0.251	0.936	HR	0.736	0.267	0.436	1.243
ICAM1.Olink	Tier 3	A.1.bl Tofacitinib 5mg	contrast (X)	0.055	0.587	HR	0.457	0.409	0.205	1.018
ICAM1.Olink	Tier 3	A.1.bl TNFi	contrast (X)	0.245	0.477	HR	0.667	0.348	0.337	1.32
ICAM1.Olink	Tier 3	A.0.12m Overall, possible interaction	ANOVA	0.848	0.921	NA
ICAM1.Olink	Tier 3	A.1.12m Overall, no interaction	contrast (X)	0.553	0.906	HR	0.927	0.129	0.72	1.192
ICAM1.Olink	Tier 3	A.1.12m Tofacitinib 10mg	contrast (X)	0.831	0.992	HR	0.956	0.209	0.635	1.44
ICAM1.Olink	Tier 3	A.1.12m Tofacitinib 5mg	contrast (X)	0.812	0.886	HR	0.967	0.139	0.736	1.272
ICAM1.Olink	Tier 3	A.1.12m TNFi	contrast (X)	0.215	0.673	HR	0.779	0.202	0.524	1.156
ICAM1.Olink	Tier 3	B.0.bl Overall	interaction	0.429	0.672	NA
ICAM1.Olink	Tier 3	B.1.bl Tofacitinib 10mg vs TNFi	contrast (X)	0.823	0.95	HR	1.103	0.439	0.467	2.606
ICAM1.Olink	Tier 3	B.1.bl Tofacitinib 5mg vs TNFi	contrast (X)	0.48	0.785	HR	0.684	0.536	0.239	1.958
ICAM1.Olink	Tier 3	B.0.12m Overall	interaction	0.815	0.956	NA
ICAM1.Olink	Tier 3	B.1.12m Tofacitinib 10mg vs TNFi	contrast (X)	0.477	0.924	HR	1.228	0.289	0.697	2.165
ICAM1.Olink	Tier 3	B.1.12m Tofacitinib 5mg vs TNFi	contrast (X)	0.374	0.808	HR	1.243	0.245	0.769	2.006
ICAM1.Olink	Tier 3	C.0 Overall	ANOVA	0.624	0.833	NA
ICAM1.Olink	Tier 3	C.1.all Tofacitinib 10mg vs TNFi	contrast (Arm)	0.161	0.75	DeltaLog	0.08	0.057	-0.032	0.192
ICAM1.Olink	Tier 3	C.1.all Tofacitinib 5mg vs TNFi	contrast (Arm)	0.579	0.73	DeltaLog	0.037	0.066	-0.093	0.166
ICAM1.Olink	Tier 3	C.2.ctrl Tofacitinib 10mg vs TNFi	contrast (Arm)	0.197	0.709	DeltaLog	0.081	0.063	-0.042	0.205
ICAM1.Olink	Tier 3	C.2.ctrl Tofacitinib 5mg vs TNFi	contrast (Arm)	0.448	0.702	DeltaLog	0.055	0.073	-0.088	0.199
ICAM1.Olink	Tier 3	C.3.case Tofacitinib 10mg vs TNFi	contrast (Arm)	0.523	0.788	DeltaLog	0.083	0.13	-0.172	0.338
ICAM1.Olink	Tier 3	C.3.case Tofacitinib 5mg vs TNFi	contrast (Arm)	0.854	0.93	DeltaLog	-0.027	0.149	-0.319	0.264
ICAM1.Olink	Tier 3	D.0 Overall	ANOVA	0.439	0.702	NA
ICAM1.Olink	Tier 3	D.1.all Tofacitinib 10mg vs TNFi	contrast (Arm)	0.126	0.265	DeltaLog	-0.101	0.066	-0.23	0.028
ICAM1.Olink	Tier 3	D.1.all Tofacitinib 5mg vs TNFi	contrast (Arm)	0.622	0.754	DeltaLog	-0.038	0.076	-0.188	0.112
ICAM1.Olink	Tier 3	D.2.ctrl Tofacitinib 10mg vs TNFi	contrast (Arm)	0.073	0.187	DeltaLog	-0.127	0.071	-0.266	0.012
ICAM1.Olink	Tier 3	D.2.ctrl Tofacitinib 5mg vs TNFi	contrast (Arm)	0.445	0.763	DeltaLog	-0.063	0.082	-0.223	0.098
ICAM1.Olink	Tier 3	D.3.case Tofacitinib 10mg vs TNFi	contrast (Arm)	0.668	0.928	DeltaLog	0.081	0.189	-0.29	0.452
ICAM1.Olink	Tier 3	D.3.case Tofacitinib 5mg vs TNFi	contrast (Arm)	0.524	0.817	DeltaLog	0.139	0.218	-0.289	0.566
ICAM1.Olink	Tier 3	E.0 Overall	ANOVA	0.674	0.899	NA
ICAM1.Olink	Tier 3	E.1 Tofacitinib 10mg	contrast (CFB)	0.458	0.944	HR	1.161	0.201	0.783	1.721
ICAM1.Olink	Tier 3	E.1 Tofacitinib 5mg	contrast (CFB)	0.687	0.981	HR	1.131	0.306	0.621	2.06
ICAM1.Olink	Tier 3	E.1 TNFi	contrast (CFB)	0.192	0.89	HR	0.728	0.243	0.452	1.173
ICAM1.Olink	Tier 3	F.0 Overall	interaction	0.49	0.882	NA
ICAM1.Olink	Tier 3	F.1 Tofacitinib 10mg vs TNFi	contrast (CFB)	0.143	0.765	HR	1.594	0.319	0.853	2.978
ICAM1.Olink	Tier 3	F.1 Tofacitinib 5mg vs TNFi	contrast (CFB)	0.259	0.954	HR	1.554	0.39	0.723	3.338
ICAM1.Olink	Tier 3	G.0	contrast (Group)	0.868	0.946	DeltaLog	-0.017	0.105	-0.227	0.192
ICAM1.Olink	Tier 3	G.1	contrast (Group)	0.55	0.863	DeltaLog	-0.063	0.103	-0.273	0.148
ICAM3.Olink	Tier 3	A.0.bl Overall, possible interaction	ANOVA	0.007	0.13	NA
ICAM3.Olink	Tier 3	A.1.bl Overall, no interaction	contrast (X)	0.013	0.234	HR	0.642	0.179	0.452	0.911
ICAM3.Olink	Tier 3	A.1.bl Tofacitinib 10mg	contrast (X)	0.167	0.936	HR	0.685	0.274	0.401	1.172
ICAM3.Olink	Tier 3	A.1.bl Tofacitinib 5mg	contrast (X)	0.107	0.587	HR	0.659	0.259	0.397	1.094
ICAM3.Olink	Tier 3	A.1.bl TNFi	contrast (X)	0.072	0.361	HR	0.501	0.384	0.236	1.063
ICAM3.Olink	Tier 3	A.0.12m Overall, possible interaction	ANOVA	0.52	0.851	NA
ICAM3.Olink	Tier 3	A.1.12m Overall, no interaction	contrast (X)	0.475	0.906	HR	0.887	0.167	0.639	1.232
ICAM3.Olink	Tier 3	A.1.12m Tofacitinib 10mg	contrast (X)	0.98	0.992	HR	1.008	0.309	0.55	1.848
ICAM3.Olink	Tier 3	A.1.12m Tofacitinib 5mg	contrast (X)	0.689	0.875	HR	0.911	0.233	0.576	1.439
ICAM3.Olink	Tier 3	A.1.12m TNFi	contrast (X)	0.066	0.394	HR	0.634	0.248	0.39	1.031
ICAM3.Olink	Tier 3	B.0.bl Overall	interaction	0.685	0.824	NA
ICAM3.Olink	Tier 3	B.1.bl Tofacitinib 10mg vs TNFi	contrast (X)	0.506	0.845	HR	1.368	0.471	0.543	3.443
ICAM3.Olink	Tier 3	B.1.bl Tofacitinib 5mg vs TNFi	contrast (X)	0.553	0.83	HR	1.316	0.463	0.531	3.262
ICAM3.Olink	Tier 3	B.0.12m Overall	interaction	0.469	0.849	NA
ICAM3.Olink	Tier 3	B.1.12m Tofacitinib 10mg vs TNFi	contrast (X)	0.24	0.822	HR	1.589	0.394	0.734	3.437
ICAM3.Olink	Tier 3	B.1.12m Tofacitinib 5mg vs TNFi	contrast (X)	0.286	0.751	HR	1.436	0.339	0.739	2.791
ICAM3.Olink	Tier 3	C.0 Overall	ANOVA	0.374	0.718	NA
ICAM3.Olink	Tier 3	C.1.all Tofacitinib 10mg vs TNFi	contrast (Arm)	0.223	0.763	DeltaLog	0.061	0.05	-0.037	0.16
ICAM3.Olink	Tier 3	C.1.all Tofacitinib 5mg vs TNFi	contrast (Arm)	0.632	0.758	DeltaLog	-0.028	0.058	-0.142	0.086
ICAM3.Olink	Tier 3	C.2.ctrl Tofacitinib 10mg vs TNFi	contrast (Arm)	0.372	0.817	DeltaLog	0.049	0.055	-0.059	0.158
ICAM3.Olink	Tier 3	C.2.ctrl Tofacitinib 5mg vs TNFi	contrast (Arm)	0.634	0.787	DeltaLog	-0.031	0.064	-0.156	0.095
ICAM3.Olink	Tier 3	C.3.case Tofacitinib 10mg vs TNFi	contrast (Arm)	0.287	0.739	DeltaLog	0.121	0.114	-0.102	0.344
ICAM3.Olink	Tier 3	C.3.case Tofacitinib 5mg vs TNFi	contrast (Arm)	0.982	0.995	DeltaLog	-0.003	0.131	-0.259	0.253
ICAM3.Olink	Tier 3	D.0 Overall	ANOVA	0.004	0.024	NA
ICAM3.Olink	Tier 3	D.1.all Tofacitinib 10mg vs TNFi	contrast (Arm)	0.000167	0.001	DeltaLog	-0.201	0.053	-0.306	-0.096
ICAM3.Olink	Tier 3	D.1.all Tofacitinib 5mg vs TNFi	contrast (Arm)	0.056	0.236	DeltaLog	-0.118	0.062	-0.239	0.003
ICAM3.Olink	Tier 3	D.2.ctrl Tofacitinib 10mg vs TNFi	contrast (Arm)	0.000115	0.000722	DeltaLog	-0.22	0.057	-0.332	-0.108
ICAM3.Olink	Tier 3	D.2.ctrl Tofacitinib 5mg vs TNFi	contrast (Arm)	0.049	0.27	DeltaLog	-0.131	0.066	-0.26	-0.000702
ICAM3.Olink	Tier 3	D.3.case Tofacitinib 10mg vs TNFi	contrast (Arm)	0.663	0.928	DeltaLog	-0.067	0.153	-0.367	0.234
ICAM3.Olink	Tier 3	D.3.case Tofacitinib 5mg vs TNFi	contrast (Arm)	0.873	0.939	DeltaLog	-0.028	0.176	-0.374	0.318
ICAM3.Olink	Tier 3	E.0 Overall	ANOVA	0.59	0.869	NA
ICAM3.Olink	Tier 3	E.1 Tofacitinib 10mg	contrast (CFB)	0.37	0.944	HR	1.353	0.337	0.698	2.622
ICAM3.Olink	Tier 3	E.1 Tofacitinib 5mg	contrast (CFB)	0.808	0.981	HR	1.057	0.23	0.674	1.658
ICAM3.Olink	Tier 3	E.1 TNFi	contrast (CFB)	0.448	0.89	HR	0.789	0.312	0.428	1.455
ICAM3.Olink	Tier 3	F.0 Overall	interaction	0.471	0.882	NA
ICAM3.Olink	Tier 3	F.1 Tofacitinib 10mg vs TNFi	contrast (CFB)	0.238	0.765	HR	1.715	0.457	0.7	4.198
ICAM3.Olink	Tier 3	F.1 Tofacitinib 5mg vs TNFi	contrast (CFB)	0.448	0.954	HR	1.34	0.385	0.63	2.85
ICAM3.Olink	Tier 3	G.0	contrast (Group)	0.917	0.946	DeltaLog	0.008	0.079	-0.15	0.166
ICAM3.Olink	Tier 3	G.1	contrast (Group)	0.228	0.522	DeltaLog	-0.108	0.088	-0.287	0.071
IL-27.Olink	Tier 3	A.0.bl Overall, possible interaction	ANOVA	0.471	0.566	NA
IL-27.Olink	Tier 3	A.1.bl Overall, no interaction	contrast (X)	0.865	0.943	HR	1.031	0.18	0.724	1.468
IL-27.Olink	Tier 3	A.1.bl Tofacitinib 10mg	contrast (X)	0.75	0.943	HR	1.076	0.229	0.687	1.685
IL-27.Olink	Tier 3	A.1.bl Tofacitinib 5mg	contrast (X)	0.426	0.731	HR	1.226	0.256	0.742	2.024
IL-27.Olink	Tier 3	A.1.bl TNFi	contrast (X)	0.548	0.818	HR	0.624	0.784	0.134	2.902
IL-27.Olink	Tier 3	A.0.12m Overall, possible interaction	ANOVA	0.576	0.854	NA
IL-27.Olink	Tier 3	A.1.12m Overall, no interaction	contrast (X)	0.643	0.926	HR	1.112	0.229	0.71	1.742
IL-27.Olink	Tier 3	A.1.12m Tofacitinib 10mg	contrast (X)	0.526	0.992	HR	1.258	0.362	0.619	2.558
IL-27.Olink	Tier 3	A.1.12m Tofacitinib 5mg	contrast (X)	0.493	0.875	HR	0.797	0.331	0.417	1.524
IL-27.Olink	Tier 3	A.1.12m TNFi	contrast (X)	0.688	0.927	HR	1.181	0.415	0.524	2.662
IL-27.Olink	Tier 3	B.0.bl Overall	interaction	0.291	0.654	NA
IL-27.Olink	Tier 3	B.1.bl Tofacitinib 10mg vs TNFi	contrast (X)	0.506	0.845	HR	1.723	0.818	0.347	8.554
IL-27.Olink	Tier 3	B.1.bl Tofacitinib 5mg vs TNFi	contrast (X)	0.412	0.7	HR	1.964	0.823	0.392	9.848
IL-27.Olink	Tier 3	B.0.12m Overall	interaction	0.472	0.849	NA
IL-27.Olink	Tier 3	B.1.12m Tofacitinib 10mg vs TNFi	contrast (X)	0.909	0.985	HR	1.065	0.552	0.361	3.14
IL-27.Olink	Tier 3	B.1.12m Tofacitinib 5mg vs TNFi	contrast (X)	0.457	0.808	HR	0.675	0.528	0.24	1.901
IL-27.Olink	Tier 3	C.0 Overall	ANOVA	0.912	0.939	NA
IL-27.Olink	Tier 3	C.1.all Tofacitinib 10mg vs TNFi	contrast (Arm)	0.889	0.941	DeltaLog	0.011	0.077	-0.141	0.162
IL-27.Olink	Tier 3	C.1.all Tofacitinib 5mg vs TNFi	contrast (Arm)	0.863	0.899	DeltaLog	-0.015	0.088	-0.188	0.158
IL-27.Olink	Tier 3	C.2.ctrl Tofacitinib 10mg vs TNFi	contrast (Arm)	0.813	0.973	DeltaLog	-0.021	0.087	-0.191	0.15
IL-27.Olink	Tier 3	C.2.ctrl Tofacitinib 5mg vs TNFi	contrast (Arm)	0.591	0.78	DeltaLog	-0.053	0.099	-0.248	0.141
IL-27.Olink	Tier 3	C.3.case Tofacitinib 10mg vs TNFi	contrast (Arm)	0.434	0.788	DeltaLog	0.135	0.173	-0.203	0.473
IL-27.Olink	Tier 3	C.3.case Tofacitinib 5mg vs TNFi	contrast (Arm)	0.492	0.858	DeltaLog	0.135	0.197	-0.251	0.521
IL-27.Olink	Tier 3	D.0 Overall	ANOVA	0.613	0.766	NA
IL-27.Olink	Tier 3	D.1.all Tofacitinib 10mg vs TNFi	contrast (Arm)	0.203	0.385	DeltaLog	-0.074	0.058	-0.189	0.04
IL-27.Olink	Tier 3	D.1.all Tofacitinib 5mg vs TNFi	contrast (Arm)	0.386	0.684	DeltaLog	-0.058	0.066	-0.188	0.073
IL-27.Olink	Tier 3	D.2.ctrl Tofacitinib 10mg vs TNFi	contrast (Arm)	0.228	0.416	DeltaLog	-0.076	0.063	-0.199	0.047
IL-27.Olink	Tier 3	D.2.ctrl Tofacitinib 5mg vs TNFi	contrast (Arm)	0.603	0.792	DeltaLog	-0.037	0.071	-0.177	0.103
IL-27.Olink	Tier 3	D.3.case Tofacitinib 10mg vs TNFi	contrast (Arm)	0.605	0.907	DeltaLog	-0.087	0.167	-0.414	0.241
IL-27.Olink	Tier 3	D.3.case Tofacitinib 5mg vs TNFi	contrast (Arm)	0.296	0.665	DeltaLog	-0.195	0.187	-0.561	0.171
IL-27.Olink	Tier 3	E.0 Overall	ANOVA	0.402	0.826	NA
IL-27.Olink	Tier 3	E.1 Tofacitinib 10mg	contrast (CFB)	0.46	0.944	HR	1.351	0.407	0.608	2.998
IL-27.Olink	Tier 3	E.1 Tofacitinib 5mg	contrast (CFB)	0.507	0.981	HR	0.661	0.624	0.194	2.247
IL-27.Olink	Tier 3	E.1 TNFi	contrast (CFB)	0.322	0.89	HR	1.857	0.625	0.546	6.324
IL-27.Olink	Tier 3	F.0 Overall	interaction	0.331	0.768	NA
IL-27.Olink	Tier 3	F.1 Tofacitinib 10mg vs TNFi	contrast (CFB)	0.668	0.928	HR	0.727	0.742	0.17	3.113
IL-27.Olink	Tier 3	F.1 Tofacitinib 5mg vs TNFi	contrast (CFB)	0.243	0.954	HR	0.356	0.885	0.063	2.015
IL-27.Olink	Tier 3	G.0	contrast (Group)	0.471	0.875	DeltaLog	-0.094	0.129	-0.353	0.165
IL-27.Olink	Tier 3	G.1	contrast (Group)	0.259	0.557	DeltaLog	0.133	0.116	-0.103	0.37
IL18.Olink	Tier 3	A.0.bl Overall, possible interaction	ANOVA	0.722	0.8	NA
IL18.Olink	Tier 3	A.1.bl Overall, no interaction	contrast (X)	0.347	0.713	HR	0.88	0.136	0.674	1.149
IL18.Olink	Tier 3	A.1.bl Tofacitinib 10mg	contrast (X)	0.256	0.936	HR	0.847	0.147	0.635	1.129
IL18.Olink	Tier 3	A.1.bl Tofacitinib 5mg	contrast (X)	0.998	0.998	HR	0.999	0.249	0.613	1.628
IL18.Olink	Tier 3	A.1.bl TNFi	contrast (X)	0.764	0.873	HR	0.848	0.55	0.288	2.491
IL18.Olink	Tier 3	A.0.12m Overall, possible interaction	ANOVA	0.545	0.853	NA
IL18.Olink	Tier 3	A.1.12m Overall, no interaction	contrast (X)	0.58	0.906	HR	0.874	0.243	0.543	1.408
IL18.Olink	Tier 3	A.1.12m Tofacitinib 10mg	contrast (X)	0.7	0.992	HR	0.882	0.327	0.465	1.672
IL18.Olink	Tier 3	A.1.12m Tofacitinib 5mg	contrast (X)	0.774	0.875	HR	1.12	0.394	0.517	2.424
IL18.Olink	Tier 3	A.1.12m TNFi	contrast (X)	0.432	0.746	HR	0.558	0.743	0.13	2.393
IL18.Olink	Tier 3	B.0.bl Overall	interaction	0.859	0.945	NA
IL18.Olink	Tier 3	B.1.bl Tofacitinib 10mg vs TNFi	contrast (X)	0.998	0.998	HR	0.999	0.568	0.328	3.04
IL18.Olink	Tier 3	B.1.bl Tofacitinib 5mg vs TNFi	contrast (X)	0.785	0.92	HR	1.179	0.604	0.361	3.847
IL18.Olink	Tier 3	B.0.12m Overall	interaction	0.478	0.849	NA
IL18.Olink	Tier 3	B.1.12m Tofacitinib 10mg vs TNFi	contrast (X)	0.573	0.924	HR	1.58	0.811	0.322	7.749
IL18.Olink	Tier 3	B.1.12m Tofacitinib 5mg vs TNFi	contrast (X)	0.407	0.808	HR	2.006	0.839	0.387	10.398
IL18.Olink	Tier 3	C.0 Overall	ANOVA	0.749	0.871	NA
IL18.Olink	Tier 3	C.1.all Tofacitinib 10mg vs TNFi	contrast (Arm)	0.384	0.889	DeltaLog	-0.09	0.103	-0.292	0.112
IL18.Olink	Tier 3	C.1.all Tofacitinib 5mg vs TNFi	contrast (Arm)	0.215	0.697	DeltaLog	-0.146	0.118	-0.377	0.085
IL18.Olink	Tier 3	C.2.ctrl Tofacitinib 10mg vs TNFi	contrast (Arm)	0.565	0.886	DeltaLog	-0.067	0.116	-0.294	0.16
IL18.Olink	Tier 3	C.2.ctrl Tofacitinib 5mg vs TNFi	contrast (Arm)	0.253	0.552	DeltaLog	-0.152	0.133	-0.411	0.108
IL18.Olink	Tier 3	C.3.case Tofacitinib 10mg vs TNFi	contrast (Arm)	0.439	0.788	DeltaLog	-0.178	0.231	-0.63	0.274
IL18.Olink	Tier 3	C.3.case Tofacitinib 5mg vs TNFi	contrast (Arm)	0.635	0.88	DeltaLog	-0.125	0.263	-0.64	0.39
IL18.Olink	Tier 3	D.0 Overall	ANOVA	0.68	0.83	NA
IL18.Olink	Tier 3	D.1.all Tofacitinib 10mg vs TNFi	contrast (Arm)	0.171	0.333	DeltaLog	-0.116	0.085	-0.282	0.05
IL18.Olink	Tier 3	D.1.all Tofacitinib 5mg vs TNFi	contrast (Arm)	0.714	0.816	DeltaLog	-0.035	0.096	-0.224	0.153
IL18.Olink	Tier 3	D.2.ctrl Tofacitinib 10mg vs TNFi	contrast (Arm)	0.179	0.358	DeltaLog	-0.122	0.091	-0.301	0.056
IL18.Olink	Tier 3	D.2.ctrl Tofacitinib 5mg vs TNFi	contrast (Arm)	0.645	0.8	DeltaLog	-0.048	0.104	-0.251	0.156
IL18.Olink	Tier 3	D.3.case Tofacitinib 10mg vs TNFi	contrast (Arm)	0.829	0.947	DeltaLog	-0.052	0.242	-0.526	0.422
IL18.Olink	Tier 3	D.3.case Tofacitinib 5mg vs TNFi	contrast (Arm)	0.821	0.92	DeltaLog	0.061	0.271	-0.469	0.591
IL18.Olink	Tier 3	E.0 Overall	ANOVA	0.874	0.979	NA
IL18.Olink	Tier 3	E.1 Tofacitinib 10mg	contrast (CFB)	0.846	0.944	HR	0.921	0.424	0.401	2.114
IL18.Olink	Tier 3	E.1 Tofacitinib 5mg	contrast (CFB)	0.955	0.981	HR	0.97	0.533	0.341	2.76
IL18.Olink	Tier 3	E.1 TNFi	contrast (CFB)	0.482	0.89	HR	0.612	0.698	0.156	2.407
IL18.Olink	Tier 3	F.0 Overall	interaction	0.818	0.979	NA
IL18.Olink	Tier 3	F.1 Tofacitinib 10mg vs TNFi	contrast (CFB)	0.617	0.928	HR	1.504	0.817	0.303	7.455
IL18.Olink	Tier 3	F.1 Tofacitinib 5mg vs TNFi	contrast (CFB)	0.6	0.954	HR	1.584	0.877	0.284	8.833
IL18.Olink	Tier 3	G.0	contrast (Group)	0.159	0.875	DeltaLog	-0.171	0.12	-0.411	0.069
IL18.Olink	Tier 3	G.1	contrast (Group)	0.426	0.776	DeltaLog	-0.119	0.148	-0.421	0.183
IL6.Olink	Tier 3	A.0.bl Overall, possible interaction	ANOVA	0.399	0.553	NA
IL6.Olink	Tier 3	A.1.bl Overall, no interaction	contrast (X)	0.282	0.656	HR	0.844	0.158	0.62	1.15
IL6.Olink	Tier 3	A.1.bl Tofacitinib 10mg	contrast (X)	0.6	0.943	HR	0.879	0.246	0.542	1.425
IL6.Olink	Tier 3	A.1.bl Tofacitinib 5mg	contrast (X)	0.142	0.6	HR	0.686	0.257	0.415	1.134
IL6.Olink	Tier 3	A.1.bl TNFi	contrast (X)	1	1	HR	1	0.285	0.572	1.747
IL6.Olink	Tier 3	A.0.12m Overall, possible interaction	ANOVA	0.797	0.897	NA
IL6.Olink	Tier 3	A.1.12m Overall, no interaction	contrast (X)	0.608	0.906	HR	1.138	0.252	0.694	1.866
IL6.Olink	Tier 3	A.1.12m Tofacitinib 10mg	contrast (X)	0.965	0.992	HR	0.976	0.567	0.321	2.962
IL6.Olink	Tier 3	A.1.12m Tofacitinib 5mg	contrast (X)	0.727	0.875	HR	1.106	0.29	0.626	1.954
IL6.Olink	Tier 3	A.1.12m TNFi	contrast (X)	0.229	0.678	HR	1.463	0.316	0.787	2.721
IL6.Olink	Tier 3	B.0.bl Overall	interaction	0.555	0.744	NA
IL6.Olink	Tier 3	B.1.bl Tofacitinib 10mg vs TNFi	contrast (X)	0.73	0.907	HR	0.879	0.375	0.422	1.832
IL6.Olink	Tier 3	B.1.bl Tofacitinib 5mg vs TNFi	contrast (X)	0.324	0.673	HR	0.686	0.382	0.324	1.45
IL6.Olink	Tier 3	B.0.12m Overall	interaction	0.725	0.912	NA
IL6.Olink	Tier 3	B.1.12m Tofacitinib 10mg vs TNFi	contrast (X)	0.531	0.924	HR	0.667	0.648	0.187	2.373
IL6.Olink	Tier 3	B.1.12m Tofacitinib 5mg vs TNFi	contrast (X)	0.513	0.839	HR	0.756	0.427	0.327	1.746
IL6.Olink	Tier 3	C.0 Overall	ANOVA	0.866	0.906	NA
IL6.Olink	Tier 3	C.1.all Tofacitinib 10mg vs TNFi	contrast (Arm)	0.757	0.941	DeltaLog	-0.077	0.248	-0.563	0.41
IL6.Olink	Tier 3	C.1.all Tofacitinib 5mg vs TNFi	contrast (Arm)	0.851	0.899	DeltaLog	0.053	0.284	-0.503	0.609
IL6.Olink	Tier 3	C.2.ctrl Tofacitinib 10mg vs TNFi	contrast (Arm)	0.949	0.973	DeltaLog	-0.018	0.278	-0.563	0.528
IL6.Olink	Tier 3	C.2.ctrl Tofacitinib 5mg vs TNFi	contrast (Arm)	0.544	0.78	DeltaLog	0.193	0.318	-0.431	0.817
IL6.Olink	Tier 3	C.3.case Tofacitinib 10mg vs TNFi	contrast (Arm)	0.581	0.788	DeltaLog	-0.306	0.554	-1.391	0.779
IL6.Olink	Tier 3	C.3.case Tofacitinib 5mg vs TNFi	contrast (Arm)	0.438	0.815	DeltaLog	-0.489	0.631	-1.726	0.748
IL6.Olink	Tier 3	D.0 Overall	ANOVA	0.617	0.766	NA
IL6.Olink	Tier 3	D.1.all Tofacitinib 10mg vs TNFi	contrast (Arm)	0.595	0.793	DeltaLog	-0.105	0.197	-0.492	0.282
IL6.Olink	Tier 3	D.1.all Tofacitinib 5mg vs TNFi	contrast (Arm)	0.436	0.687	DeltaLog	0.174	0.224	-0.264	0.612
IL6.Olink	Tier 3	D.2.ctrl Tofacitinib 10mg vs TNFi	contrast (Arm)	0.757	0.852	DeltaLog	-0.065	0.212	-0.481	0.35
IL6.Olink	Tier 3	D.2.ctrl Tofacitinib 5mg vs TNFi	contrast (Arm)	0.362	0.724	DeltaLog	0.219	0.241	-0.253	0.692
IL6.Olink	Tier 3	D.3.case Tofacitinib 10mg vs TNFi	contrast (Arm)	0.455	0.907	DeltaLog	-0.423	0.566	-1.533	0.687
IL6.Olink	Tier 3	D.3.case Tofacitinib 5mg vs TNFi	contrast (Arm)	0.783	0.895	DeltaLog	-0.174	0.632	-1.412	1.065
IL6.Olink	Tier 3	E.0 Overall	ANOVA	0.916	0.987	NA
IL6.Olink	Tier 3	E.1 Tofacitinib 10mg	contrast (CFB)	0.867	0.944	HR	1.099	0.564	0.364	3.324
IL6.Olink	Tier 3	E.1 Tofacitinib 5mg	contrast (CFB)	0.609	0.981	HR	1.175	0.316	0.633	2.183
IL6.Olink	Tier 3	E.1 TNFi	contrast (CFB)	0.655	0.89	HR	1.232	0.467	0.493	3.077
IL6.Olink	Tier 3	F.0 Overall	interaction	0.975	0.979	NA
IL6.Olink	Tier 3	F.1 Tofacitinib 10mg vs TNFi	contrast (CFB)	0.876	0.928	HR	0.892	0.731	0.213	3.739
IL6.Olink	Tier 3	F.1 Tofacitinib 5mg vs TNFi	contrast (CFB)	0.933	0.974	HR	0.954	0.561	0.318	2.864
IL6.Olink	Tier 3	G.0	contrast (Group)	0.836	0.942	DeltaLog	-0.066	0.317	-0.703	0.571
IL6.Olink	Tier 3	G.1	contrast (Group)	0.997	0.998	DeltaLog	-0.001	0.381	-0.78	0.778
KLK6.Olink	Tier 3	A.0.bl Overall, possible interaction	ANOVA	0.959	0.982	NA
KLK6.Olink	Tier 3	A.1.bl Overall, no interaction	contrast (X)	0.894	0.943	HR	1.017	0.124	0.797	1.297
KLK6.Olink	Tier 3	A.1.bl Tofacitinib 10mg	contrast (X)	0.997	0.998	HR	1.001	0.245	0.62	1.617
KLK6.Olink	Tier 3	A.1.bl Tofacitinib 5mg	contrast (X)	0.875	0.984	HR	0.976	0.153	0.724	1.317
KLK6.Olink	Tier 3	A.1.bl TNFi	contrast (X)	0.63	0.84	HR	1.169	0.324	0.619	2.206
KLK6.Olink	Tier 3	A.0.12m Overall, possible interaction	ANOVA	0.912	0.938	NA
KLK6.Olink	Tier 3	A.1.12m Overall, no interaction	contrast (X)	0.954	0.992	HR	0.986	0.249	0.605	1.607
KLK6.Olink	Tier 3	A.1.12m Tofacitinib 10mg	contrast (X)	0.978	0.992	HR	1.008	0.273	0.59	1.722
KLK6.Olink	Tier 3	A.1.12m Tofacitinib 5mg	contrast (X)	0.778	0.875	HR	0.82	0.702	0.207	3.246
KLK6.Olink	Tier 3	A.1.12m TNFi	contrast (X)	0.742	0.927	HR	1.234	0.64	0.352	4.327
KLK6.Olink	Tier 3	B.0.bl Overall	interaction	0.866	0.945	NA
KLK6.Olink	Tier 3	B.1.bl Tofacitinib 10mg vs TNFi	contrast (X)	0.704	0.907	HR	0.856	0.408	0.385	1.905
KLK6.Olink	Tier 3	B.1.bl Tofacitinib 5mg vs TNFi	contrast (X)	0.614	0.884	HR	0.835	0.357	0.415	1.681
KLK6.Olink	Tier 3	B.0.12m Overall	interaction	0.769	0.938	NA
KLK6.Olink	Tier 3	B.1.12m Tofacitinib 10mg vs TNFi	contrast (X)	0.77	0.939	HR	0.816	0.693	0.21	3.174
KLK6.Olink	Tier 3	B.1.12m Tofacitinib 5mg vs TNFi	contrast (X)	0.667	0.924	HR	0.665	0.95	0.103	4.277
KLK6.Olink	Tier 3	C.0 Overall	ANOVA	0.868	0.906	NA
KLK6.Olink	Tier 3	C.1.all Tofacitinib 10mg vs TNFi	contrast (Arm)	0.388	0.889	DeltaLog	-0.056	0.065	-0.183	0.071
KLK6.Olink	Tier 3	C.1.all Tofacitinib 5mg vs TNFi	contrast (Arm)	0.352	0.73	DeltaLog	-0.07	0.075	-0.217	0.077
KLK6.Olink	Tier 3	C.2.ctrl Tofacitinib 10mg vs TNFi	contrast (Arm)	0.496	0.886	DeltaLog	-0.049	0.073	-0.192	0.093
KLK6.Olink	Tier 3	C.2.ctrl Tofacitinib 5mg vs TNFi	contrast (Arm)	0.543	0.78	DeltaLog	-0.051	0.084	-0.216	0.114
KLK6.Olink	Tier 3	C.3.case Tofacitinib 10mg vs TNFi	contrast (Arm)	0.574	0.788	DeltaLog	-0.082	0.147	-0.37	0.205
KLK6.Olink	Tier 3	C.3.case Tofacitinib 5mg vs TNFi	contrast (Arm)	0.395	0.815	DeltaLog	-0.144	0.169	-0.476	0.188
KLK6.Olink	Tier 3	D.0 Overall	ANOVA	0.905	0.972	NA
KLK6.Olink	Tier 3	D.1.all Tofacitinib 10mg vs TNFi	contrast (Arm)	0.311	0.522	DeltaLog	0.059	0.059	-0.056	0.175
KLK6.Olink	Tier 3	D.1.all Tofacitinib 5mg vs TNFi	contrast (Arm)	0.515	0.722	DeltaLog	0.045	0.069	-0.09	0.18
KLK6.Olink	Tier 3	D.2.ctrl Tofacitinib 10mg vs TNFi	contrast (Arm)	0.333	0.522	DeltaLog	0.061	0.063	-0.063	0.185
KLK6.Olink	Tier 3	D.2.ctrl Tofacitinib 5mg vs TNFi	contrast (Arm)	0.511	0.792	DeltaLog	0.049	0.074	-0.097	0.194
KLK6.Olink	Tier 3	D.3.case Tofacitinib 10mg vs TNFi	contrast (Arm)	0.779	0.947	DeltaLog	0.046	0.163	-0.274	0.365
KLK6.Olink	Tier 3	D.3.case Tofacitinib 5mg vs TNFi	contrast (Arm)	0.925	0.94	DeltaLog	0.018	0.192	-0.358	0.394
KLK6.Olink	Tier 3	E.0 Overall	ANOVA	0.979	0.988	NA
KLK6.Olink	Tier 3	E.1 Tofacitinib 10mg	contrast (CFB)	0.895	0.944	HR	1.035	0.263	0.618	1.733
KLK6.Olink	Tier 3	E.1 Tofacitinib 5mg	contrast (CFB)	0.883	0.981	HR	0.876	0.899	0.15	5.108
KLK6.Olink	Tier 3	E.1 TNFi	contrast (CFB)	0.835	0.977	HR	1.126	0.57	0.368	3.443
KLK6.Olink	Tier 3	F.0 Overall	interaction	0.91	0.979	NA
KLK6.Olink	Tier 3	F.1 Tofacitinib 10mg vs TNFi	contrast (CFB)	0.892	0.928	HR	0.919	0.622	0.272	3.112
KLK6.Olink	Tier 3	F.1 Tofacitinib 5mg vs TNFi	contrast (CFB)	0.813	0.954	HR	0.778	1.063	0.097	6.247
KLK6.Olink	Tier 3	G.0	contrast (Group)	0.488	0.875	DeltaLog	-0.051	0.073	-0.196	0.095
KLK6.Olink	Tier 3	G.1	contrast (Group)	0.083	0.383	DeltaLog	0.177	0.099	-0.024	0.379
LCN2.Olink	Tier 3	A.0.bl Overall, possible interaction	ANOVA	0.044	0.244	NA
LCN2.Olink	Tier 3	A.1.bl Overall, no interaction	contrast (X)	0.556	0.926	HR	1.094	0.152	0.812	1.473
LCN2.Olink	Tier 3	A.1.bl Tofacitinib 10mg	contrast (X)	0.349	0.936	HR	0.818	0.215	0.536	1.246
LCN2.Olink	Tier 3	A.1.bl Tofacitinib 5mg	contrast (X)	0.315	0.683	HR	1.258	0.229	0.804	1.97
LCN2.Olink	Tier 3	A.1.bl TNFi	contrast (X)	0.046	0.361	HR	1.957	0.337	1.011	3.785
LCN2.Olink	Tier 3	A.0.12m Overall, possible interaction	ANOVA	0.099	0.332	NA
LCN2.Olink	Tier 3	A.1.12m Overall, no interaction	contrast (X)	0.012	0.273	HR	1.388	0.13	1.076	1.79
LCN2.Olink	Tier 3	A.1.12m Tofacitinib 10mg	contrast (X)	0.282	0.992	HR	1.225	0.188	0.847	1.771
LCN2.Olink	Tier 3	A.1.12m Tofacitinib 5mg	contrast (X)	0.058	0.455	HR	1.559	0.234	0.986	2.466
LCN2.Olink	Tier 3	A.1.12m TNFi	contrast (X)	0.043	0.371	HR	1.689	0.259	1.018	2.804
LCN2.Olink	Tier 3	B.0.bl Overall	interaction	0.022	0.322	NA
LCN2.Olink	Tier 3	B.1.bl Tofacitinib 10mg vs TNFi	contrast (X)	0.029	0.545	HR	0.418	0.4	0.191	0.915
LCN2.Olink	Tier 3	B.1.bl Tofacitinib 5mg vs TNFi	contrast (X)	0.278	0.656	HR	0.643	0.407	0.29	1.427
LCN2.Olink	Tier 3	B.0.12m Overall	interaction	0.607	0.886	NA
LCN2.Olink	Tier 3	B.1.12m Tofacitinib 10mg vs TNFi	contrast (X)	0.316	0.911	HR	0.725	0.321	0.387	1.36
LCN2.Olink	Tier 3	B.1.12m Tofacitinib 5mg vs TNFi	contrast (X)	0.818	0.939	HR	0.923	0.348	0.466	1.826
LCN2.Olink	Tier 3	C.0 Overall	ANOVA	0.138	0.522	NA
LCN2.Olink	Tier 3	C.1.all Tofacitinib 10mg vs TNFi	contrast (Arm)	0.246	0.804	DeltaLog	0.078	0.067	-0.054	0.21
LCN2.Olink	Tier 3	C.1.all Tofacitinib 5mg vs TNFi	contrast (Arm)	0.871	0.899	DeltaLog	0.013	0.078	-0.14	0.165
LCN2.Olink	Tier 3	C.2.ctrl Tofacitinib 10mg vs TNFi	contrast (Arm)	0.043	0.539	DeltaLog	0.151	0.075	0.004	0.297
LCN2.Olink	Tier 3	C.2.ctrl Tofacitinib 5mg vs TNFi	contrast (Arm)	0.577	0.78	DeltaLog	0.048	0.086	-0.121	0.218
LCN2.Olink	Tier 3	C.3.case Tofacitinib 10mg vs TNFi	contrast (Arm)	0.135	0.603	DeltaLog	-0.229	0.153	-0.53	0.072
LCN2.Olink	Tier 3	C.3.case Tofacitinib 5mg vs TNFi	contrast (Arm)	0.398	0.815	DeltaLog	-0.149	0.176	-0.493	0.196
LCN2.Olink	Tier 3	D.0 Overall	ANOVA	0.019	0.098	NA
LCN2.Olink	Tier 3	D.1.all Tofacitinib 10mg vs TNFi	contrast (Arm)	0.012	0.042	DeltaLog	-0.157	0.062	-0.278	-0.035
LCN2.Olink	Tier 3	D.1.all Tofacitinib 5mg vs TNFi	contrast (Arm)	0.774	0.858	DeltaLog	0.021	0.072	-0.12	0.161
LCN2.Olink	Tier 3	D.2.ctrl Tofacitinib 10mg vs TNFi	contrast (Arm)	0.01	0.042	DeltaLog	-0.171	0.066	-0.301	-0.041
LCN2.Olink	Tier 3	D.2.ctrl Tofacitinib 5mg vs TNFi	contrast (Arm)	0.835	0.913	DeltaLog	0.016	0.076	-0.134	0.166
LCN2.Olink	Tier 3	D.3.case Tofacitinib 10mg vs TNFi	contrast (Arm)	0.683	0.928	DeltaLog	-0.073	0.178	-0.422	0.276
LCN2.Olink	Tier 3	D.3.case Tofacitinib 5mg vs TNFi	contrast (Arm)	0.831	0.92	DeltaLog	0.044	0.204	-0.356	0.443
LCN2.Olink	Tier 3	E.0 Overall	ANOVA	0.043	0.295	NA
LCN2.Olink	Tier 3	E.1 Tofacitinib 10mg	contrast (CFB)	0.01	0.246	HR	1.864	0.243	1.159	2.999
LCN2.Olink	Tier 3	E.1 Tofacitinib 5mg	contrast (CFB)	0.138	0.981	HR	1.427	0.239	0.893	2.281
LCN2.Olink	Tier 3	E.1 TNFi	contrast (CFB)	0.965	0.992	HR	1.024	0.536	0.358	2.93
LCN2.Olink	Tier 3	F.0 Overall	interaction	0.411	0.882	NA
LCN2.Olink	Tier 3	F.1 Tofacitinib 10mg vs TNFi	contrast (CFB)	0.311	0.801	HR	1.82	0.592	0.571	5.806
LCN2.Olink	Tier 3	F.1 Tofacitinib 5mg vs TNFi	contrast (CFB)	0.574	0.954	HR	1.393	0.59	0.438	4.432
LCN2.Olink	Tier 3	G.0	contrast (Group)	0.567	0.926	DeltaLog	-0.081	0.141	-0.363	0.201
LCN2.Olink	Tier 3	G.1	contrast (Group)	0.881	0.998	DeltaLog	-0.021	0.142	-0.312	0.269
LEP.Olink	Tier 3	A.0.bl Overall, possible interaction	ANOVA	0.003	0.063	NA
LEP.Olink	Tier 3	A.1.bl Overall, no interaction	contrast (X)	0.007	0.176	HR	1.621	0.18	1.139	2.309
LEP.Olink	Tier 3	A.1.bl Tofacitinib 10mg	contrast (X)	0.048	0.692	HR	1.424	0.179	1.003	2.022
LEP.Olink	Tier 3	A.1.bl Tofacitinib 5mg	contrast (X)	0.234	0.643	HR	2.174	0.653	0.604	7.822
LEP.Olink	Tier 3	A.1.bl TNFi	contrast (X)	0.123	0.402	HR	1.984	0.444	0.831	4.74
LEP.Olink	Tier 3	A.0.12m Overall, possible interaction	ANOVA	0.002	0.04	NA
LEP.Olink	Tier 3	A.1.12m Overall, no interaction	contrast (X)	0.096	0.582	HR	1.445	0.221	0.936	2.229
LEP.Olink	Tier 3	A.1.12m Tofacitinib 10mg	contrast (X)	0.979	0.992	HR	1.006	0.23	0.64	1.58
LEP.Olink	Tier 3	A.1.12m Tofacitinib 5mg	contrast (X)	0.057	0.455	HR	5.845	0.927	0.95	35.943
LEP.Olink	Tier 3	A.1.12m TNFi	contrast (X)	0.181	0.594	HR	2.025	0.528	0.719	5.699
LEP.Olink	Tier 3	B.0.bl Overall	interaction	0.452	0.678	NA
LEP.Olink	Tier 3	B.1.bl Tofacitinib 10mg vs TNFi	contrast (X)	0.487	0.845	HR	0.718	0.477	0.282	1.829
LEP.Olink	Tier 3	B.1.bl Tofacitinib 5mg vs TNFi	contrast (X)	0.908	0.969	HR	1.096	0.792	0.232	5.174
LEP.Olink	Tier 3	B.0.12m Overall	interaction	0.005	0.109	NA
LEP.Olink	Tier 3	B.1.12m Tofacitinib 10mg vs TNFi	contrast (X)	0.225	0.822	HR	0.497	0.576	0.161	1.537
LEP.Olink	Tier 3	B.1.12m Tofacitinib 5mg vs TNFi	contrast (X)	0.321	0.797	HR	2.886	1.068	0.356	23.415
LEP.Olink	Tier 3	C.0 Overall	ANOVA	0.782	0.889	NA
LEP.Olink	Tier 3	C.1.all Tofacitinib 10mg vs TNFi	contrast (Arm)	0.261	0.817	DeltaLog	-0.184	0.164	-0.504	0.137
LEP.Olink	Tier 3	C.1.all Tofacitinib 5mg vs TNFi	contrast (Arm)	0.785	0.87	DeltaLog	-0.051	0.187	-0.417	0.315
LEP.Olink	Tier 3	C.2.ctrl Tofacitinib 10mg vs TNFi	contrast (Arm)	0.393	0.817	DeltaLog	-0.155	0.181	-0.51	0.201
LEP.Olink	Tier 3	C.2.ctrl Tofacitinib 5mg vs TNFi	contrast (Arm)	0.894	0.92	DeltaLog	-0.028	0.207	-0.434	0.379
LEP.Olink	Tier 3	C.3.case Tofacitinib 10mg vs TNFi	contrast (Arm)	0.386	0.788	DeltaLog	-0.312	0.361	-1.019	0.394
LEP.Olink	Tier 3	C.3.case Tofacitinib 5mg vs TNFi	contrast (Arm)	0.702	0.894	DeltaLog	-0.157	0.411	-0.963	0.649
LEP.Olink	Tier 3	D.0 Overall	ANOVA	0.265	0.52	NA
LEP.Olink	Tier 3	D.1.all Tofacitinib 10mg vs TNFi	contrast (Arm)	0.352	0.575	DeltaLog	0.09	0.097	-0.1	0.28
LEP.Olink	Tier 3	D.1.all Tofacitinib 5mg vs TNFi	contrast (Arm)	0.123	0.368	DeltaLog	0.169	0.11	-0.046	0.384
LEP.Olink	Tier 3	D.2.ctrl Tofacitinib 10mg vs TNFi	contrast (Arm)	0.254	0.446	DeltaLog	0.118	0.103	-0.085	0.321
LEP.Olink	Tier 3	D.2.ctrl Tofacitinib 5mg vs TNFi	contrast (Arm)	0.252	0.609	DeltaLog	0.135	0.117	-0.096	0.365
LEP.Olink	Tier 3	D.3.case Tofacitinib 10mg vs TNFi	contrast (Arm)	0.73	0.947	DeltaLog	-0.095	0.276	-0.635	0.445
LEP.Olink	Tier 3	D.3.case Tofacitinib 5mg vs TNFi	contrast (Arm)	0.249	0.617	DeltaLog	0.354	0.307	-0.248	0.956
LEP.Olink	Tier 3	E.0 Overall	ANOVA	0.114	0.382	NA
LEP.Olink	Tier 3	E.1 Tofacitinib 10mg	contrast (CFB)	0.222	0.939	HR	0.531	0.519	0.192	1.468
LEP.Olink	Tier 3	E.1 Tofacitinib 5mg	contrast (CFB)	0.148	0.981	HR	4.103	0.976	0.606	27.771
LEP.Olink	Tier 3	E.1 TNFi	contrast (CFB)	0.589	0.89	HR	1.519	0.775	0.333	6.936
LEP.Olink	Tier 3	F.0 Overall	interaction	0.052	0.297	NA
LEP.Olink	Tier 3	F.1 Tofacitinib 10mg vs TNFi	contrast (CFB)	0.259	0.765	HR	0.349	0.933	0.056	2.173
LEP.Olink	Tier 3	F.1 Tofacitinib 5mg vs TNFi	contrast (CFB)	0.424	0.954	HR	2.701	1.242	0.237	30.813
LEP.Olink	Tier 3	G.0	contrast (Group)	0.151	0.875	DeltaLog	0.319	0.219	-0.12	0.759
LEP.Olink	Tier 3	G.1	contrast (Group)	0.508	0.843	DeltaLog	0.134	0.2	-0.274	0.542
LPL.Olink	Tier 3	A.0.bl Overall, possible interaction	ANOVA	0.042	0.244	NA
LPL.Olink	Tier 3	A.1.bl Overall, no interaction	contrast (X)	0.045	0.401	HR	1.415	0.173	1.008	1.985
LPL.Olink	Tier 3	A.1.bl Tofacitinib 10mg	contrast (X)	0.491	0.943	HR	1.205	0.271	0.709	2.049
LPL.Olink	Tier 3	A.1.bl Tofacitinib 5mg	contrast (X)	0.108	0.587	HR	1.726	0.339	0.888	3.356
LPL.Olink	Tier 3	A.1.bl TNFi	contrast (X)	0.049	0.361	HR	1.665	0.259	1.002	2.769
LPL.Olink	Tier 3	A.0.12m Overall, possible interaction	ANOVA	0.709	0.854	NA
LPL.Olink	Tier 3	A.1.12m Overall, no interaction	contrast (X)	0.955	0.992	HR	0.987	0.232	0.626	1.556
LPL.Olink	Tier 3	A.1.12m Tofacitinib 10mg	contrast (X)	0.559	0.992	HR	0.81	0.361	0.399	1.643
LPL.Olink	Tier 3	A.1.12m Tofacitinib 5mg	contrast (X)	0.8	0.886	HR	1.166	0.606	0.355	3.828
LPL.Olink	Tier 3	A.1.12m TNFi	contrast (X)	0.413	0.746	HR	1.203	0.226	0.773	1.873
LPL.Olink	Tier 3	B.0.bl Overall	interaction	0.476	0.685	NA
LPL.Olink	Tier 3	B.1.bl Tofacitinib 10mg vs TNFi	contrast (X)	0.393	0.845	HR	0.724	0.378	0.345	1.519
LPL.Olink	Tier 3	B.1.bl Tofacitinib 5mg vs TNFi	contrast (X)	0.932	0.973	HR	1.036	0.421	0.454	2.365
LPL.Olink	Tier 3	B.0.12m Overall	interaction	0.502	0.849	NA
LPL.Olink	Tier 3	B.1.12m Tofacitinib 10mg vs TNFi	contrast (X)	0.359	0.924	HR	0.673	0.432	0.289	1.569
LPL.Olink	Tier 3	B.1.12m Tofacitinib 5mg vs TNFi	contrast (X)	0.961	0.997	HR	0.969	0.64	0.276	3.4
LPL.Olink	Tier 3	C.0 Overall	ANOVA	0.102	0.522	NA
LPL.Olink	Tier 3	C.1.all Tofacitinib 10mg vs TNFi	contrast (Arm)	0.01	0.319	DeltaLog	-0.211	0.083	-0.373	-0.05
LPL.Olink	Tier 3	C.1.all Tofacitinib 5mg vs TNFi	contrast (Arm)	0.047	0.336	DeltaLog	-0.187	0.094	-0.372	-0.002
LPL.Olink	Tier 3	C.2.ctrl Tofacitinib 10mg vs TNFi	contrast (Arm)	0.045	0.539	DeltaLog	-0.185	0.092	-0.366	-0.004
LPL.Olink	Tier 3	C.2.ctrl Tofacitinib 5mg vs TNFi	contrast (Arm)	0.068	0.305	DeltaLog	-0.193	0.105	-0.399	0.014
LPL.Olink	Tier 3	C.3.case Tofacitinib 10mg vs TNFi	contrast (Arm)	0.082	0.547	DeltaLog	-0.319	0.183	-0.679	0.04
LPL.Olink	Tier 3	C.3.case Tofacitinib 5mg vs TNFi	contrast (Arm)	0.409	0.815	DeltaLog	-0.173	0.209	-0.583	0.237
LPL.Olink	Tier 3	D.0 Overall	ANOVA	0.955	0.982	NA
LPL.Olink	Tier 3	D.1.all Tofacitinib 10mg vs TNFi	contrast (Arm)	0.87	0.957	DeltaLog	0.013	0.08	-0.144	0.17
LPL.Olink	Tier 3	D.1.all Tofacitinib 5mg vs TNFi	contrast (Arm)	0.639	0.754	DeltaLog	0.043	0.091	-0.135	0.22
LPL.Olink	Tier 3	D.2.ctrl Tofacitinib 10mg vs TNFi	contrast (Arm)	0.707	0.831	DeltaLog	0.032	0.086	-0.136	0.201
LPL.Olink	Tier 3	D.2.ctrl Tofacitinib 5mg vs TNFi	contrast (Arm)	0.518	0.792	DeltaLog	0.063	0.098	-0.128	0.255
LPL.Olink	Tier 3	D.3.case Tofacitinib 10mg vs TNFi	contrast (Arm)	0.622	0.913	DeltaLog	-0.112	0.227	-0.558	0.333
LPL.Olink	Tier 3	D.3.case Tofacitinib 5mg vs TNFi	contrast (Arm)	0.716	0.895	DeltaLog	-0.093	0.254	-0.59	0.405
LPL.Olink	Tier 3	E.0 Overall	ANOVA	0.457	0.844	NA
LPL.Olink	Tier 3	E.1 Tofacitinib 10mg	contrast (CFB)	0.309	0.944	HR	0.72	0.323	0.383	1.355
LPL.Olink	Tier 3	E.1 Tofacitinib 5mg	contrast (CFB)	0.693	0.981	HR	0.745	0.747	0.172	3.219
LPL.Olink	Tier 3	E.1 TNFi	contrast (CFB)	0.477	0.89	HR	1.197	0.253	0.729	1.967
LPL.Olink	Tier 3	F.0 Overall	interaction	0.395	0.882	NA
LPL.Olink	Tier 3	F.1 Tofacitinib 10mg vs TNFi	contrast (CFB)	0.216	0.765	HR	0.602	0.411	0.269	1.346
LPL.Olink	Tier 3	F.1 Tofacitinib 5mg vs TNFi	contrast (CFB)	0.547	0.954	HR	0.622	0.787	0.133	2.912
LPL.Olink	Tier 3	G.0	contrast (Group)	0.686	0.931	DeltaLog	0.043	0.107	-0.171	0.258
LPL.Olink	Tier 3	G.1	contrast (Group)	0.68	0.946	DeltaLog	0.055	0.131	-0.213	0.322
MBL2.Olink	Tier 3	A.0.bl Overall, possible interaction	ANOVA	0.243	0.414	NA
MBL2.Olink	Tier 3	A.1.bl Overall, no interaction	contrast (X)	0.686	0.938	HR	1.065	0.156	0.784	1.447
MBL2.Olink	Tier 3	A.1.bl Tofacitinib 10mg	contrast (X)	0.331	0.936	HR	1.27	0.246	0.784	2.058
MBL2.Olink	Tier 3	A.1.bl Tofacitinib 5mg	contrast (X)	0.772	0.932	HR	1.082	0.273	0.634	1.847
MBL2.Olink	Tier 3	A.1.bl TNFi	contrast (X)	0.136	0.417	HR	0.644	0.294	0.362	1.148
MBL2.Olink	Tier 3	A.0.12m Overall, possible interaction	ANOVA	0.03	0.233	NA
MBL2.Olink	Tier 3	A.1.12m Overall, no interaction	contrast (X)	0.1	0.582	HR	1.347	0.181	0.944	1.922
MBL2.Olink	Tier 3	A.1.12m Tofacitinib 10mg	contrast (X)	0.271	0.992	HR	1.375	0.29	0.78	2.426
MBL2.Olink	Tier 3	A.1.12m Tofacitinib 5mg	contrast (X)	0.054	0.455	HR	2.081	0.38	0.988	4.38
MBL2.Olink	Tier 3	A.1.12m TNFi	contrast (X)	0.295	0.678	HR	0.797	0.217	0.521	1.219
MBL2.Olink	Tier 3	B.0.bl Overall	interaction	0.14	0.488	NA
MBL2.Olink	Tier 3	B.1.bl Tofacitinib 10mg vs TNFi	contrast (X)	0.077	0.761	HR	1.971	0.384	0.928	4.187
MBL2.Olink	Tier 3	B.1.bl Tofacitinib 5mg vs TNFi	contrast (X)	0.198	0.561	HR	1.679	0.403	0.762	3.699
MBL2.Olink	Tier 3	B.0.12m Overall	interaction	0.093	0.425	NA
MBL2.Olink	Tier 3	B.1.12m Tofacitinib 10mg vs TNFi	contrast (X)	0.127	0.654	HR	1.726	0.358	0.856	3.481
MBL2.Olink	Tier 3	B.1.12m Tofacitinib 5mg vs TNFi	contrast (X)	0.028	0.289	HR	2.612	0.437	1.108	6.154
MBL2.Olink	Tier 3	C.0 Overall	ANOVA	0.097	0.522	NA
MBL2.Olink	Tier 3	C.1.all Tofacitinib 10mg vs TNFi	contrast (Arm)	0.14	0.75	DeltaLog	0.284	0.192	-0.093	0.66
MBL2.Olink	Tier 3	C.1.all Tofacitinib 5mg vs TNFi	contrast (Arm)	0.553	0.73	DeltaLog	-0.132	0.222	-0.567	0.304
MBL2.Olink	Tier 3	C.2.ctrl Tofacitinib 10mg vs TNFi	contrast (Arm)	0.506	0.886	DeltaLog	0.142	0.214	-0.277	0.561
MBL2.Olink	Tier 3	C.2.ctrl Tofacitinib 5mg vs TNFi	contrast (Arm)	0.379	0.65	DeltaLog	-0.218	0.248	-0.704	0.268
MBL2.Olink	Tier 3	C.3.case Tofacitinib 10mg vs TNFi	contrast (Arm)	0.046	0.547	DeltaLog	0.876	0.44	0.014	1.739
MBL2.Olink	Tier 3	C.3.case Tofacitinib 5mg vs TNFi	contrast (Arm)	0.636	0.88	DeltaLog	0.239	0.504	-0.749	1.227
MBL2.Olink	Tier 3	D.0 Overall	ANOVA	0.559	0.753	NA
MBL2.Olink	Tier 3	D.1.all Tofacitinib 10mg vs TNFi	contrast (Arm)	0.235	0.434	DeltaLog	-0.124	0.104	-0.328	0.08
MBL2.Olink	Tier 3	D.1.all Tofacitinib 5mg vs TNFi	contrast (Arm)	0.985	0.985	DeltaLog	-0.002	0.121	-0.239	0.234
MBL2.Olink	Tier 3	D.2.ctrl Tofacitinib 10mg vs TNFi	contrast (Arm)	0.203	0.388	DeltaLog	-0.141	0.111	-0.358	0.076
MBL2.Olink	Tier 3	D.2.ctrl Tofacitinib 5mg vs TNFi	contrast (Arm)	0.717	0.834	DeltaLog	-0.047	0.129	-0.299	0.206
MBL2.Olink	Tier 3	D.3.case Tofacitinib 10mg vs TNFi	contrast (Arm)	0.994	0.994	DeltaLog	-0.002	0.298	-0.586	0.582
MBL2.Olink	Tier 3	D.3.case Tofacitinib 5mg vs TNFi	contrast (Arm)	0.402	0.7	DeltaLog	0.288	0.343	-0.385	0.96
MBL2.Olink	Tier 3	E.0 Overall	ANOVA	0.027	0.295	NA
MBL2.Olink	Tier 3	E.1 Tofacitinib 10mg	contrast (CFB)	0.184	0.939	HR	1.823	0.452	0.752	4.42
MBL2.Olink	Tier 3	E.1 Tofacitinib 5mg	contrast (CFB)	0.17	0.981	HR	12.706	1.851	0.338	478.179
MBL2.Olink	Tier 3	E.1 TNFi	contrast (CFB)	0.864	0.977	HR	1.094	0.524	0.392	3.056
MBL2.Olink	Tier 3	F.0 Overall	interaction	0.091	0.409	NA
MBL2.Olink	Tier 3	F.1 Tofacitinib 10mg vs TNFi	contrast (CFB)	0.457	0.89	HR	1.666	0.686	0.434	6.395
MBL2.Olink	Tier 3	F.1 Tofacitinib 5mg vs TNFi	contrast (CFB)	0.202	0.954	HR	11.611	1.922	0.269	501.997
MBL2.Olink	Tier 3	G.0	contrast (Group)	0.701	0.931	DeltaLog	0.102	0.265	-0.428	0.632
MBL2.Olink	Tier 3	G.1	contrast (Group)	0.121	0.417	DeltaLog	-0.203	0.127	-0.463	0.057
MCP-1.Olink	Tier 3	A.0.bl Overall, possible interaction	ANOVA	0.371	0.523	NA
MCP-1.Olink	Tier 3	A.1.bl Overall, no interaction	contrast (X)	0.303	0.681	HR	0.865	0.14	0.657	1.139
MCP-1.Olink	Tier 3	A.1.bl Tofacitinib 10mg	contrast (X)	0.786	0.943	HR	0.954	0.171	0.682	1.335
MCP-1.Olink	Tier 3	A.1.bl Tofacitinib 5mg	contrast (X)	0.738	0.932	HR	0.897	0.324	0.476	1.693
MCP-1.Olink	Tier 3	A.1.bl TNFi	contrast (X)	0.101	0.361	HR	0.604	0.307	0.331	1.103
MCP-1.Olink	Tier 3	A.0.12m Overall, possible interaction	ANOVA	0.857	0.921	NA
MCP-1.Olink	Tier 3	A.1.12m Overall, no interaction	contrast (X)	0.889	0.992	HR	0.958	0.31	0.522	1.756
MCP-1.Olink	Tier 3	A.1.12m Tofacitinib 10mg	contrast (X)	0.957	0.992	HR	1.026	0.473	0.406	2.592
MCP-1.Olink	Tier 3	A.1.12m Tofacitinib 5mg	contrast (X)	0.876	0.901	HR	1.103	0.626	0.324	3.758
MCP-1.Olink	Tier 3	A.1.12m TNFi	contrast (X)	0.434	0.746	HR	0.691	0.473	0.273	1.746
MCP-1.Olink	Tier 3	B.0.bl Overall	interaction	0.395	0.661	NA
MCP-1.Olink	Tier 3	B.1.bl Tofacitinib 10mg vs TNFi	contrast (X)	0.193	0.761	HR	1.58	0.351	0.793	3.145
MCP-1.Olink	Tier 3	B.1.bl Tofacitinib 5mg vs TNFi	contrast (X)	0.375	0.676	HR	1.485	0.446	0.619	3.561
MCP-1.Olink	Tier 3	B.0.12m Overall	interaction	0.698	0.898	NA
MCP-1.Olink	Tier 3	B.1.12m Tofacitinib 10mg vs TNFi	contrast (X)	0.553	0.924	HR	1.485	0.667	0.402	5.486
MCP-1.Olink	Tier 3	B.1.12m Tofacitinib 5mg vs TNFi	contrast (X)	0.551	0.85	HR	1.597	0.785	0.343	7.439
MCP-1.Olink	Tier 3	C.0 Overall	ANOVA	0.092	0.522	NA
MCP-1.Olink	Tier 3	C.1.all Tofacitinib 10mg vs TNFi	contrast (Arm)	0.706	0.941	DeltaLog	0.03	0.081	-0.128	0.189
MCP-1.Olink	Tier 3	C.1.all Tofacitinib 5mg vs TNFi	contrast (Arm)	0.056	0.336	DeltaLog	-0.179	0.094	-0.362	0.004
MCP-1.Olink	Tier 3	C.2.ctrl Tofacitinib 10mg vs TNFi	contrast (Arm)	0.943	0.973	DeltaLog	-0.006	0.09	-0.183	0.17
MCP-1.Olink	Tier 3	C.2.ctrl Tofacitinib 5mg vs TNFi	contrast (Arm)	0.045	0.271	DeltaLog	-0.21	0.105	-0.415	-0.004
MCP-1.Olink	Tier 3	C.3.case Tofacitinib 10mg vs TNFi	contrast (Arm)	0.31	0.77	DeltaLog	0.185	0.182	-0.172	0.542
MCP-1.Olink	Tier 3	C.3.case Tofacitinib 5mg vs TNFi	contrast (Arm)	0.817	0.919	DeltaLog	-0.049	0.21	-0.461	0.364
MCP-1.Olink	Tier 3	D.0 Overall	ANOVA	0.947	0.982	NA
MCP-1.Olink	Tier 3	D.1.all Tofacitinib 10mg vs TNFi	contrast (Arm)	0.822	0.925	DeltaLog	-0.016	0.07	-0.153	0.121
MCP-1.Olink	Tier 3	D.1.all Tofacitinib 5mg vs TNFi	contrast (Arm)	0.477	0.687	DeltaLog	-0.059	0.083	-0.221	0.103
MCP-1.Olink	Tier 3	D.2.ctrl Tofacitinib 10mg vs TNFi	contrast (Arm)	0.721	0.831	DeltaLog	-0.027	0.076	-0.175	0.121
MCP-1.Olink	Tier 3	D.2.ctrl Tofacitinib 5mg vs TNFi	contrast (Arm)	0.43	0.756	DeltaLog	-0.07	0.089	-0.245	0.104
MCP-1.Olink	Tier 3	D.3.case Tofacitinib 10mg vs TNFi	contrast (Arm)	0.763	0.947	DeltaLog	0.059	0.194	-0.322	0.44
MCP-1.Olink	Tier 3	D.3.case Tofacitinib 5mg vs TNFi	contrast (Arm)	0.94	0.94	DeltaLog	0.017	0.229	-0.431	0.465
MCP-1.Olink	Tier 3	E.0 Overall	ANOVA	0.919	0.987	NA
MCP-1.Olink	Tier 3	E.1 Tofacitinib 10mg	contrast (CFB)	0.924	0.951	HR	1.052	0.537	0.367	3.017
MCP-1.Olink	Tier 3	E.1 Tofacitinib 5mg	contrast (CFB)	0.926	0.981	HR	1.08	0.827	0.213	5.463
MCP-1.Olink	Tier 3	E.1 TNFi	contrast (CFB)	0.543	0.89	HR	0.721	0.539	0.251	2.072
MCP-1.Olink	Tier 3	F.0 Overall	interaction	0.782	0.971	NA
MCP-1.Olink	Tier 3	F.1 Tofacitinib 10mg vs TNFi	contrast (CFB)	0.619	0.928	HR	1.46	0.761	0.328	6.494
MCP-1.Olink	Tier 3	F.1 Tofacitinib 5mg vs TNFi	contrast (CFB)	0.682	0.954	HR	1.498	0.985	0.217	10.337
MCP-1.Olink	Tier 3	G.0	contrast (Group)	0.568	0.926	DeltaLog	0.064	0.111	-0.159	0.286
MCP-1.Olink	Tier 3	G.1	contrast (Group)	0.667	0.946	DeltaLog	0.076	0.175	-0.279	0.431
MPO.Olink	Tier 3	A.0.bl Overall, possible interaction	ANOVA	0.277	0.434	NA
MPO.Olink	Tier 3	A.1.bl Overall, no interaction	contrast (X)	0.328	0.695	HR	0.84	0.178	0.593	1.191
MPO.Olink	Tier 3	A.1.bl Tofacitinib 10mg	contrast (X)	0.953	0.994	HR	0.986	0.243	0.612	1.587
MPO.Olink	Tier 3	A.1.bl Tofacitinib 5mg	contrast (X)	0.029	0.587	HR	0.651	0.197	0.443	0.957
MPO.Olink	Tier 3	A.1.bl TNFi	contrast (X)	0.614	0.835	HR	0.865	0.288	0.491	1.522
MPO.Olink	Tier 3	A.0.12m Overall, possible interaction	ANOVA	0.379	0.722	NA
MPO.Olink	Tier 3	A.1.12m Overall, no interaction	contrast (X)	0.801	0.978	HR	1.064	0.246	0.657	1.723
MPO.Olink	Tier 3	A.1.12m Tofacitinib 10mg	contrast (X)	0.319	0.992	HR	1.353	0.303	0.747	2.45
MPO.Olink	Tier 3	A.1.12m Tofacitinib 5mg	contrast (X)	0.429	0.875	HR	0.749	0.365	0.366	1.533
MPO.Olink	Tier 3	A.1.12m TNFi	contrast (X)	0.873	0.953	HR	0.922	0.506	0.342	2.487
MPO.Olink	Tier 3	B.0.bl Overall	interaction	0.333	0.654	NA
MPO.Olink	Tier 3	B.1.bl Tofacitinib 10mg vs TNFi	contrast (X)	0.729	0.907	HR	1.14	0.377	0.544	2.389
MPO.Olink	Tier 3	B.1.bl Tofacitinib 5mg vs TNFi	contrast (X)	0.418	0.7	HR	0.753	0.351	0.378	1.498
MPO.Olink	Tier 3	B.0.12m Overall	interaction	0.23	0.663	NA
MPO.Olink	Tier 3	B.1.12m Tofacitinib 10mg vs TNFi	contrast (X)	0.514	0.924	HR	1.467	0.587	0.464	4.637
MPO.Olink	Tier 3	B.1.12m Tofacitinib 5mg vs TNFi	contrast (X)	0.74	0.932	HR	0.812	0.626	0.238	2.77
MPO.Olink	Tier 3	C.0 Overall	ANOVA	0.408	0.719	NA
MPO.Olink	Tier 3	C.1.all Tofacitinib 10mg vs TNFi	contrast (Arm)	0.54	0.941	DeltaLog	0.052	0.085	-0.114	0.218
MPO.Olink	Tier 3	C.1.all Tofacitinib 5mg vs TNFi	contrast (Arm)	0.403	0.73	DeltaLog	-0.082	0.098	-0.275	0.11
MPO.Olink	Tier 3	C.2.ctrl Tofacitinib 10mg vs TNFi	contrast (Arm)	0.673	0.937	DeltaLog	0.04	0.095	-0.146	0.226
MPO.Olink	Tier 3	C.2.ctrl Tofacitinib 5mg vs TNFi	contrast (Arm)	0.691	0.825	DeltaLog	-0.044	0.11	-0.259	0.172
MPO.Olink	Tier 3	C.3.case Tofacitinib 10mg vs TNFi	contrast (Arm)	0.593	0.788	DeltaLog	0.102	0.191	-0.273	0.478
MPO.Olink	Tier 3	C.3.case Tofacitinib 5mg vs TNFi	contrast (Arm)	0.298	0.789	DeltaLog	-0.23	0.221	-0.663	0.203
MPO.Olink	Tier 3	D.0 Overall	ANOVA	0.097	0.339	NA
MPO.Olink	Tier 3	D.1.all Tofacitinib 10mg vs TNFi	contrast (Arm)	0.016	0.052	DeltaLog	-0.192	0.08	-0.348	-0.036
MPO.Olink	Tier 3	D.1.all Tofacitinib 5mg vs TNFi	contrast (Arm)	0.474	0.687	DeltaLog	-0.067	0.093	-0.25	0.116
MPO.Olink	Tier 3	D.2.ctrl Tofacitinib 10mg vs TNFi	contrast (Arm)	0.011	0.042	DeltaLog	-0.219	0.086	-0.387	-0.051
MPO.Olink	Tier 3	D.2.ctrl Tofacitinib 5mg vs TNFi	contrast (Arm)	0.539	0.792	DeltaLog	-0.062	0.1	-0.258	0.135
MPO.Olink	Tier 3	D.3.case Tofacitinib 10mg vs TNFi	contrast (Arm)	0.942	0.98	DeltaLog	-0.016	0.22	-0.448	0.416
MPO.Olink	Tier 3	D.3.case Tofacitinib 5mg vs TNFi	contrast (Arm)	0.693	0.891	DeltaLog	-0.102	0.26	-0.611	0.406
MPO.Olink	Tier 3	E.0 Overall	ANOVA	0.506	0.848	NA
MPO.Olink	Tier 3	E.1 Tofacitinib 10mg	contrast (CFB)	0.208	0.939	HR	1.382	0.257	0.836	2.284
MPO.Olink	Tier 3	E.1 Tofacitinib 5mg	contrast (CFB)	0.995	0.995	HR	0.997	0.588	0.314	3.158
MPO.Olink	Tier 3	E.1 TNFi	contrast (CFB)	0.759	0.943	HR	0.83	0.605	0.254	2.717
MPO.Olink	Tier 3	F.0 Overall	interaction	0.524	0.898	NA
MPO.Olink	Tier 3	F.1 Tofacitinib 10mg vs TNFi	contrast (CFB)	0.437	0.89	HR	1.664	0.655	0.461	6.002
MPO.Olink	Tier 3	F.1 Tofacitinib 5mg vs TNFi	contrast (CFB)	0.829	0.954	HR	1.2	0.843	0.23	6.257
MPO.Olink	Tier 3	G.0	contrast (Group)	0.627	0.931	DeltaLog	0.064	0.132	-0.2	0.328
MPO.Olink	Tier 3	G.1	contrast (Group)	0.422	0.776	DeltaLog	-0.147	0.18	-0.513	0.22
OPG.Olink	Tier 3	A.0.bl Overall, possible interaction	ANOVA	0.919	0.973	NA
OPG.Olink	Tier 3	A.1.bl Overall, no interaction	contrast (X)	0.752	0.943	HR	0.946	0.176	0.671	1.334
OPG.Olink	Tier 3	A.1.bl Tofacitinib 10mg	contrast (X)	0.681	0.943	HR	0.903	0.249	0.554	1.471
OPG.Olink	Tier 3	A.1.bl Tofacitinib 5mg	contrast (X)	0.847	0.969	HR	0.932	0.367	0.454	1.914
OPG.Olink	Tier 3	A.1.bl TNFi	contrast (X)	0.753	0.873	HR	1.104	0.314	0.597	2.044
OPG.Olink	Tier 3	A.0.12m Overall, possible interaction	ANOVA	0.621	0.854	NA
OPG.Olink	Tier 3	A.1.12m Overall, no interaction	contrast (X)	0.319	0.906	HR	0.794	0.231	0.504	1.25
OPG.Olink	Tier 3	A.1.12m Tofacitinib 10mg	contrast (X)	0.458	0.992	HR	0.792	0.314	0.428	1.466
OPG.Olink	Tier 3	A.1.12m Tofacitinib 5mg	contrast (X)	0.603	0.875	HR	0.796	0.437	0.338	1.876
OPG.Olink	Tier 3	A.1.12m TNFi	contrast (X)	0.601	0.927	HR	0.798	0.432	0.342	1.86
OPG.Olink	Tier 3	B.0.bl Overall	interaction	0.849	0.945	NA
OPG.Olink	Tier 3	B.1.bl Tofacitinib 10mg vs TNFi	contrast (X)	0.616	0.87	HR	0.818	0.402	0.372	1.796
OPG.Olink	Tier 3	B.1.bl Tofacitinib 5mg vs TNFi	contrast (X)	0.725	0.916	HR	0.844	0.483	0.328	2.174
OPG.Olink	Tier 3	B.0.12m Overall	interaction	1	1	NA
OPG.Olink	Tier 3	B.1.12m Tofacitinib 10mg vs TNFi	contrast (X)	0.989	0.989	HR	0.993	0.528	0.352	2.796
OPG.Olink	Tier 3	B.1.12m Tofacitinib 5mg vs TNFi	contrast (X)	0.997	0.997	HR	0.998	0.61	0.302	3.298
OPG.Olink	Tier 3	C.0 Overall	ANOVA	0.847	0.906	NA
OPG.Olink	Tier 3	C.1.all Tofacitinib 10mg vs TNFi	contrast (Arm)	0.836	0.941	DeltaLog	0.015	0.074	-0.13	0.161
OPG.Olink	Tier 3	C.1.all Tofacitinib 5mg vs TNFi	contrast (Arm)	0.46	0.73	DeltaLog	-0.064	0.086	-0.232	0.105
OPG.Olink	Tier 3	C.2.ctrl Tofacitinib 10mg vs TNFi	contrast (Arm)	0.707	0.937	DeltaLog	0.031	0.083	-0.132	0.194
OPG.Olink	Tier 3	C.2.ctrl Tofacitinib 5mg vs TNFi	contrast (Arm)	0.633	0.787	DeltaLog	-0.046	0.096	-0.235	0.143
OPG.Olink	Tier 3	C.3.case Tofacitinib 10mg vs TNFi	contrast (Arm)	0.772	0.869	DeltaLog	-0.049	0.168	-0.378	0.281
OPG.Olink	Tier 3	C.3.case Tofacitinib 5mg vs TNFi	contrast (Arm)	0.49	0.858	DeltaLog	-0.134	0.194	-0.514	0.246
OPG.Olink	Tier 3	D.0 Overall	ANOVA	0.5	0.708	NA
OPG.Olink	Tier 3	D.1.all Tofacitinib 10mg vs TNFi	contrast (Arm)	0.08	0.195	DeltaLog	0.101	0.058	-0.012	0.215
OPG.Olink	Tier 3	D.1.all Tofacitinib 5mg vs TNFi	contrast (Arm)	0.398	0.684	DeltaLog	0.057	0.068	-0.076	0.191
OPG.Olink	Tier 3	D.2.ctrl Tofacitinib 10mg vs TNFi	contrast (Arm)	0.131	0.303	DeltaLog	0.094	0.062	-0.028	0.216
OPG.Olink	Tier 3	D.2.ctrl Tofacitinib 5mg vs TNFi	contrast (Arm)	0.421	0.756	DeltaLog	0.059	0.073	-0.084	0.202
OPG.Olink	Tier 3	D.3.case Tofacitinib 10mg vs TNFi	contrast (Arm)	0.333	0.892	DeltaLog	0.155	0.16	-0.159	0.469
OPG.Olink	Tier 3	D.3.case Tofacitinib 5mg vs TNFi	contrast (Arm)	0.775	0.895	DeltaLog	0.054	0.188	-0.315	0.423
OPG.Olink	Tier 3	E.0 Overall	ANOVA	0.185	0.468	NA
OPG.Olink	Tier 3	E.1 Tofacitinib 10mg	contrast (CFB)	0.4	0.944	HR	0.752	0.339	0.387	1.461
OPG.Olink	Tier 3	E.1 Tofacitinib 5mg	contrast (CFB)	0.341	0.981	HR	0.498	0.732	0.119	2.092
OPG.Olink	Tier 3	E.1 TNFi	contrast (CFB)	0.239	0.89	HR	0.57	0.477	0.224	1.452
OPG.Olink	Tier 3	F.0 Overall	interaction	0.699	0.92	NA
OPG.Olink	Tier 3	F.1 Tofacitinib 10mg vs TNFi	contrast (CFB)	0.632	0.928	HR	1.319	0.579	0.424	4.107
OPG.Olink	Tier 3	F.1 Tofacitinib 5mg vs TNFi	contrast (CFB)	0.876	0.954	HR	0.874	0.867	0.16	4.776
OPG.Olink	Tier 3	G.0	contrast (Group)	0.391	0.875	DeltaLog	0.092	0.107	-0.121	0.305
OPG.Olink	Tier 3	G.1	contrast (Group)	0.779	0.998	DeltaLog	0.038	0.134	-0.234	0.31
OPN.Olink	Tier 3	A.0.bl Overall, possible interaction	ANOVA	0.44	0.566	NA
OPN.Olink	Tier 3	A.1.bl Overall, no interaction	contrast (X)	0.475	0.897	HR	1.114	0.151	0.828	1.498
OPN.Olink	Tier 3	A.1.bl Tofacitinib 10mg	contrast (X)	0.646	0.943	HR	1.104	0.216	0.723	1.685
OPN.Olink	Tier 3	A.1.bl Tofacitinib 5mg	contrast (X)	0.586	0.824	HR	0.851	0.298	0.475	1.524
OPN.Olink	Tier 3	A.1.bl TNFi	contrast (X)	0.157	0.434	HR	1.444	0.259	0.869	2.399
OPN.Olink	Tier 3	A.0.12m Overall, possible interaction	ANOVA	0.18	0.431	NA
OPN.Olink	Tier 3	A.1.12m Overall, no interaction	contrast (X)	0.759	0.978	HR	0.938	0.209	0.622	1.414
OPN.Olink	Tier 3	A.1.12m Tofacitinib 10mg	contrast (X)	0.913	0.992	HR	1.037	0.333	0.54	1.99
OPN.Olink	Tier 3	A.1.12m Tofacitinib 5mg	contrast (X)	0.183	0.676	HR	0.579	0.41	0.259	1.295
OPN.Olink	Tier 3	A.1.12m TNFi	contrast (X)	0.163	0.592	HR	1.355	0.218	0.885	2.075
OPN.Olink	Tier 3	B.0.bl Overall	interaction	0.372	0.654	NA
OPN.Olink	Tier 3	B.1.bl Tofacitinib 10mg vs TNFi	contrast (X)	0.428	0.845	HR	0.765	0.338	0.394	1.484
OPN.Olink	Tier 3	B.1.bl Tofacitinib 5mg vs TNFi	contrast (X)	0.18	0.561	HR	0.589	0.395	0.272	1.277
OPN.Olink	Tier 3	B.0.12m Overall	interaction	0.094	0.425	NA
OPN.Olink	Tier 3	B.1.12m Tofacitinib 10mg vs TNFi	contrast (X)	0.502	0.924	HR	0.766	0.398	0.351	1.671
OPN.Olink	Tier 3	B.1.12m Tofacitinib 5mg vs TNFi	contrast (X)	0.067	0.406	HR	0.428	0.463	0.173	1.06
OPN.Olink	Tier 3	C.0 Overall	ANOVA	0.369	0.718	NA
OPN.Olink	Tier 3	C.1.all Tofacitinib 10mg vs TNFi	contrast (Arm)	0.538	0.941	DeltaLog	0.064	0.104	-0.14	0.269
OPN.Olink	Tier 3	C.1.all Tofacitinib 5mg vs TNFi	contrast (Arm)	0.413	0.73	DeltaLog	-0.099	0.121	-0.336	0.138
OPN.Olink	Tier 3	C.2.ctrl Tofacitinib 10mg vs TNFi	contrast (Arm)	0.371	0.817	DeltaLog	0.104	0.117	-0.124	0.333
OPN.Olink	Tier 3	C.2.ctrl Tofacitinib 5mg vs TNFi	contrast (Arm)	0.888	0.92	DeltaLog	-0.019	0.135	-0.284	0.246
OPN.Olink	Tier 3	C.3.case Tofacitinib 10mg vs TNFi	contrast (Arm)	0.654	0.788	DeltaLog	-0.106	0.235	-0.567	0.356
OPN.Olink	Tier 3	C.3.case Tofacitinib 5mg vs TNFi	contrast (Arm)	0.118	0.752	DeltaLog	-0.425	0.272	-0.958	0.108
OPN.Olink	Tier 3	D.0 Overall	ANOVA	0.058	0.234	NA
OPN.Olink	Tier 3	D.1.all Tofacitinib 10mg vs TNFi	contrast (Arm)	0.016	0.052	DeltaLog	-0.21	0.087	-0.382	-0.039
OPN.Olink	Tier 3	D.1.all Tofacitinib 5mg vs TNFi	contrast (Arm)	0.092	0.302	DeltaLog	-0.172	0.102	-0.373	0.028
OPN.Olink	Tier 3	D.2.ctrl Tofacitinib 10mg vs TNFi	contrast (Arm)	0.045	0.128	DeltaLog	-0.188	0.094	-0.371	-0.005
OPN.Olink	Tier 3	D.2.ctrl Tofacitinib 5mg vs TNFi	contrast (Arm)	0.342	0.709	DeltaLog	-0.104	0.109	-0.318	0.11
OPN.Olink	Tier 3	D.3.case Tofacitinib 10mg vs TNFi	contrast (Arm)	0.137	0.884	DeltaLog	-0.357	0.24	-0.828	0.114
OPN.Olink	Tier 3	D.3.case Tofacitinib 5mg vs TNFi	contrast (Arm)	0.027	0.4	DeltaLog	-0.628	0.284	-1.184	-0.072
OPN.Olink	Tier 3	E.0 Overall	ANOVA	0.131	0.397	NA
OPN.Olink	Tier 3	E.1 Tofacitinib 10mg	contrast (CFB)	0.816	0.944	HR	0.918	0.367	0.447	1.885
OPN.Olink	Tier 3	E.1 Tofacitinib 5mg	contrast (CFB)	0.336	0.981	HR	0.369	1.037	0.048	2.817
OPN.Olink	Tier 3	E.1 TNFi	contrast (CFB)	0.647	0.89	HR	1.124	0.256	0.681	1.857
OPN.Olink	Tier 3	F.0 Overall	interaction	0.102	0.434	NA
OPN.Olink	Tier 3	F.1 Tofacitinib 10mg vs TNFi	contrast (CFB)	0.65	0.928	HR	0.816	0.447	0.34	1.962
OPN.Olink	Tier 3	F.1 Tofacitinib 5mg vs TNFi	contrast (CFB)	0.298	0.954	HR	0.328	1.07	0.04	2.674
OPN.Olink	Tier 3	G.0	contrast (Group)	0.333	0.875	DeltaLog	0.142	0.145	-0.149	0.432
OPN.Olink	Tier 3	G.1	contrast (Group)	0.225	0.522	DeltaLog	-0.245	0.198	-0.647	0.158
OSMR.Olink	Tier 3	A.0.bl Overall, possible interaction	ANOVA	0.08	0.301	NA
OSMR.Olink	Tier 3	A.1.bl Overall, no interaction	contrast (X)	0.114	0.482	HR	0.766	0.169	0.551	1.066
OSMR.Olink	Tier 3	A.1.bl Tofacitinib 10mg	contrast (X)	0.345	0.936	HR	0.768	0.279	0.445	1.327
OSMR.Olink	Tier 3	A.1.bl Tofacitinib 5mg	contrast (X)	0.952	0.998	HR	1.016	0.27	0.599	1.724
OSMR.Olink	Tier 3	A.1.bl TNFi	contrast (X)	0.03	0.358	HR	0.572	0.257	0.346	0.946
OSMR.Olink	Tier 3	A.0.12m Overall, possible interaction	ANOVA	0.766	0.876	NA
OSMR.Olink	Tier 3	A.1.12m Overall, no interaction	contrast (X)	0.826	0.991	HR	0.976	0.111	0.786	1.213
OSMR.Olink	Tier 3	A.1.12m Tofacitinib 10mg	contrast (X)	0.416	0.992	HR	0.854	0.194	0.584	1.25
OSMR.Olink	Tier 3	A.1.12m Tofacitinib 5mg	contrast (X)	0.484	0.875	HR	1.071	0.098	0.884	1.298
OSMR.Olink	Tier 3	A.1.12m TNFi	contrast (X)	0.762	0.927	HR	0.93	0.24	0.581	1.487
OSMR.Olink	Tier 3	B.0.bl Overall	interaction	0.267	0.654	NA
OSMR.Olink	Tier 3	B.1.bl Tofacitinib 10mg vs TNFi	contrast (X)	0.441	0.845	HR	1.343	0.382	0.635	2.84
OSMR.Olink	Tier 3	B.1.bl Tofacitinib 5mg vs TNFi	contrast (X)	0.123	0.457	HR	1.776	0.373	0.855	3.688
OSMR.Olink	Tier 3	B.0.12m Overall	interaction	0.578	0.885	NA
OSMR.Olink	Tier 3	B.1.12m Tofacitinib 10mg vs TNFi	contrast (X)	0.782	0.939	HR	0.918	0.308	0.502	1.681
OSMR.Olink	Tier 3	B.1.12m Tofacitinib 5mg vs TNFi	contrast (X)	0.585	0.877	HR	1.152	0.258	0.694	1.911
OSMR.Olink	Tier 3	C.0 Overall	ANOVA	0.47	0.787	NA
OSMR.Olink	Tier 3	C.1.all Tofacitinib 10mg vs TNFi	contrast (Arm)	0.999	0.999	DeltaLog	4.29e-05	0.029	-0.056	0.056
OSMR.Olink	Tier 3	C.1.all Tofacitinib 5mg vs TNFi	contrast (Arm)	0.326	0.73	DeltaLog	-0.032	0.033	-0.097	0.032
OSMR.Olink	Tier 3	C.2.ctrl Tofacitinib 10mg vs TNFi	contrast (Arm)	0.68	0.937	DeltaLog	-0.013	0.032	-0.075	0.049
OSMR.Olink	Tier 3	C.2.ctrl Tofacitinib 5mg vs TNFi	contrast (Arm)	0.137	0.434	DeltaLog	-0.055	0.037	-0.127	0.017
OSMR.Olink	Tier 3	C.3.case Tofacitinib 10mg vs TNFi	contrast (Arm)	0.355	0.788	DeltaLog	0.06	0.065	-0.067	0.188
OSMR.Olink	Tier 3	C.3.case Tofacitinib 5mg vs TNFi	contrast (Arm)	0.391	0.815	DeltaLog	0.064	0.075	-0.082	0.21
OSMR.Olink	Tier 3	D.0 Overall	ANOVA	0.237	0.488	NA
OSMR.Olink	Tier 3	D.1.all Tofacitinib 10mg vs TNFi	contrast (Arm)	0.114	0.258	DeltaLog	-0.059	0.037	-0.132	0.014
OSMR.Olink	Tier 3	D.1.all Tofacitinib 5mg vs TNFi	contrast (Arm)	0.737	0.829	DeltaLog	0.015	0.043	-0.07	0.099
OSMR.Olink	Tier 3	D.2.ctrl Tofacitinib 10mg vs TNFi	contrast (Arm)	0.154	0.317	DeltaLog	-0.057	0.04	-0.135	0.021
OSMR.Olink	Tier 3	D.2.ctrl Tofacitinib 5mg vs TNFi	contrast (Arm)	0.905	0.955	DeltaLog	0.006	0.047	-0.086	0.097
OSMR.Olink	Tier 3	D.3.case Tofacitinib 10mg vs TNFi	contrast (Arm)	0.512	0.907	DeltaLog	-0.07	0.107	-0.28	0.14
OSMR.Olink	Tier 3	D.3.case Tofacitinib 5mg vs TNFi	contrast (Arm)	0.546	0.819	DeltaLog	0.075	0.124	-0.168	0.317
OSMR.Olink	Tier 3	E.0 Overall	ANOVA	0.965	0.988	NA
OSMR.Olink	Tier 3	E.1 Tofacitinib 10mg	contrast (CFB)	0.659	0.944	HR	0.924	0.18	0.649	1.314
OSMR.Olink	Tier 3	E.1 Tofacitinib 5mg	contrast (CFB)	0.608	0.981	HR	1.054	0.102	0.863	1.287
OSMR.Olink	Tier 3	E.1 TNFi	contrast (CFB)	0.939	0.992	HR	0.98	0.26	0.589	1.632
OSMR.Olink	Tier 3	F.0 Overall	interaction	0.872	0.979	NA
OSMR.Olink	Tier 3	F.1 Tofacitinib 10mg vs TNFi	contrast (CFB)	0.851	0.928	HR	0.942	0.316	0.507	1.751
OSMR.Olink	Tier 3	F.1 Tofacitinib 5mg vs TNFi	contrast (CFB)	0.797	0.954	HR	1.075	0.28	0.621	1.862
OSMR.Olink	Tier 3	G.0	contrast (Group)	0.509	0.881	DeltaLog	-0.026	0.039	-0.104	0.052
OSMR.Olink	Tier 3	G.1	contrast (Group)	0.076	0.383	DeltaLog	-0.08	0.043	-0.168	0.009
PAI.Olink	Tier 3	A.0.bl Overall, possible interaction	ANOVA	0.354	0.519	NA
PAI.Olink	Tier 3	A.1.bl Overall, no interaction	contrast (X)	0.93	0.943	HR	0.986	0.156	0.727	1.338
PAI.Olink	Tier 3	A.1.bl Tofacitinib 10mg	contrast (X)	0.877	0.991	HR	1.037	0.231	0.659	1.629
PAI.Olink	Tier 3	A.1.bl Tofacitinib 5mg	contrast (X)	0.356	0.685	HR	1.334	0.313	0.723	2.462
PAI.Olink	Tier 3	A.1.bl TNFi	contrast (X)	0.105	0.361	HR	0.689	0.23	0.439	1.081
PAI.Olink	Tier 3	A.0.12m Overall, possible interaction	ANOVA	0.685	0.854	NA
PAI.Olink	Tier 3	A.1.12m Overall, no interaction	contrast (X)	0.394	0.906	HR	0.83	0.218	0.542	1.273
PAI.Olink	Tier 3	A.1.12m Tofacitinib 10mg	contrast (X)	0.634	0.992	HR	0.846	0.351	0.426	1.683
PAI.Olink	Tier 3	A.1.12m Tofacitinib 5mg	contrast (X)	0.744	0.875	HR	0.901	0.318	0.484	1.68
PAI.Olink	Tier 3	A.1.12m TNFi	contrast (X)	0.303	0.678	HR	0.706	0.338	0.364	1.369
PAI.Olink	Tier 3	B.0.bl Overall	interaction	0.198	0.567	NA
PAI.Olink	Tier 3	B.1.bl Tofacitinib 10mg vs TNFi	contrast (X)	0.206	0.761	HR	1.505	0.323	0.799	2.836
PAI.Olink	Tier 3	B.1.bl Tofacitinib 5mg vs TNFi	contrast (X)	0.089	0.439	HR	1.938	0.389	0.904	4.153
PAI.Olink	Tier 3	B.0.12m Overall	interaction	0.88	0.961	NA
PAI.Olink	Tier 3	B.1.12m Tofacitinib 10mg vs TNFi	contrast (X)	0.712	0.924	HR	1.199	0.491	0.458	3.138
PAI.Olink	Tier 3	B.1.12m Tofacitinib 5mg vs TNFi	contrast (X)	0.599	0.88	HR	1.276	0.464	0.514	3.17
PAI.Olink	Tier 3	C.0 Overall	ANOVA	0.192	0.601	NA
PAI.Olink	Tier 3	C.1.all Tofacitinib 10mg vs TNFi	contrast (Arm)	0.78	0.941	DeltaLog	0.042	0.149	-0.251	0.334
PAI.Olink	Tier 3	C.1.all Tofacitinib 5mg vs TNFi	contrast (Arm)	0.206	0.697	DeltaLog	-0.219	0.173	-0.558	0.12
PAI.Olink	Tier 3	C.2.ctrl Tofacitinib 10mg vs TNFi	contrast (Arm)	0.737	0.937	DeltaLog	-0.056	0.167	-0.382	0.271
PAI.Olink	Tier 3	C.2.ctrl Tofacitinib 5mg vs TNFi	contrast (Arm)	0.063	0.301	DeltaLog	-0.36	0.193	-0.738	0.019
PAI.Olink	Tier 3	C.3.case Tofacitinib 10mg vs TNFi	contrast (Arm)	0.187	0.61	DeltaLog	0.445	0.337	-0.215	1.104
PAI.Olink	Tier 3	C.3.case Tofacitinib 5mg vs TNFi	contrast (Arm)	0.362	0.815	DeltaLog	0.354	0.388	-0.407	1.116
PAI.Olink	Tier 3	D.0 Overall	ANOVA	0.568	0.753	NA
PAI.Olink	Tier 3	D.1.all Tofacitinib 10mg vs TNFi	contrast (Arm)	0.945	0.98	DeltaLog	0.009	0.131	-0.248	0.266
PAI.Olink	Tier 3	D.1.all Tofacitinib 5mg vs TNFi	contrast (Arm)	0.155	0.414	DeltaLog	0.22	0.155	-0.083	0.523
PAI.Olink	Tier 3	D.2.ctrl Tofacitinib 10mg vs TNFi	contrast (Arm)	0.997	0.997	DeltaLog	-0.000453	0.141	-0.277	0.276
PAI.Olink	Tier 3	D.2.ctrl Tofacitinib 5mg vs TNFi	contrast (Arm)	0.227	0.609	DeltaLog	0.201	0.166	-0.125	0.528
PAI.Olink	Tier 3	D.3.case Tofacitinib 10mg vs TNFi	contrast (Arm)	0.816	0.947	DeltaLog	0.084	0.363	-0.628	0.796
PAI.Olink	Tier 3	D.3.case Tofacitinib 5mg vs TNFi	contrast (Arm)	0.418	0.7	DeltaLog	0.346	0.427	-0.492	1.183
PAI.Olink	Tier 3	E.0 Overall	ANOVA	0.658	0.899	NA
PAI.Olink	Tier 3	E.1 Tofacitinib 10mg	contrast (CFB)	0.478	0.944	HR	0.786	0.339	0.405	1.527
PAI.Olink	Tier 3	E.1 Tofacitinib 5mg	contrast (CFB)	0.788	0.981	HR	0.886	0.45	0.367	2.141
PAI.Olink	Tier 3	E.1 TNFi	contrast (CFB)	0.401	0.89	HR	0.737	0.364	0.361	1.503
PAI.Olink	Tier 3	F.0 Overall	interaction	0.941	0.979	NA
PAI.Olink	Tier 3	F.1 Tofacitinib 10mg vs TNFi	contrast (CFB)	0.896	0.928	HR	1.068	0.503	0.398	2.86
PAI.Olink	Tier 3	F.1 Tofacitinib 5mg vs TNFi	contrast (CFB)	0.748	0.954	HR	1.203	0.576	0.389	3.725
PAI.Olink	Tier 3	G.0	contrast (Group)	0.477	0.875	DeltaLog	0.157	0.22	-0.283	0.597
PAI.Olink	Tier 3	G.1	contrast (Group)	0.516	0.843	DeltaLog	-0.19	0.289	-0.777	0.397
PDGF subunit A.Olink	Tier 3	A.0.bl Overall, possible interaction	ANOVA	0.075	0.301	NA
PDGF subunit A.Olink	Tier 3	A.1.bl Overall, no interaction	contrast (X)	0.9	0.943	HR	0.979	0.165	0.708	1.354
PDGF subunit A.Olink	Tier 3	A.1.bl Tofacitinib 10mg	contrast (X)	0.631	0.943	HR	1.124	0.243	0.698	1.811
PDGF subunit A.Olink	Tier 3	A.1.bl Tofacitinib 5mg	contrast (X)	0.37	0.685	HR	1.224	0.226	0.787	1.906
PDGF subunit A.Olink	Tier 3	A.1.bl TNFi	contrast (X)	0.035	0.358	HR	0.494	0.334	0.257	0.951
PDGF subunit A.Olink	Tier 3	A.0.12m Overall, possible interaction	ANOVA	0.017	0.193	NA
PDGF subunit A.Olink	Tier 3	A.1.12m Overall, no interaction	contrast (X)	0.481	0.906	HR	0.86	0.214	0.566	1.308
PDGF subunit A.Olink	Tier 3	A.1.12m Tofacitinib 10mg	contrast (X)	0.992	0.992	HR	1.004	0.352	0.504	2
PDGF subunit A.Olink	Tier 3	A.1.12m Tofacitinib 5mg	contrast (X)	0.667	0.875	HR	1.097	0.214	0.72	1.67
PDGF subunit A.Olink	Tier 3	A.1.12m TNFi	contrast (X)	0.014	0.371	HR	0.211	0.631	0.061	0.728
PDGF subunit A.Olink	Tier 3	B.0.bl Overall	interaction	0.032	0.387	NA
PDGF subunit A.Olink	Tier 3	B.1.bl Tofacitinib 10mg vs TNFi	contrast (X)	0.048	0.573	HR	2.274	0.415	1.008	5.128
PDGF subunit A.Olink	Tier 3	B.1.bl Tofacitinib 5mg vs TNFi	contrast (X)	0.025	0.433	HR	2.477	0.404	1.122	5.468
PDGF subunit A.Olink	Tier 3	B.0.12m Overall	interaction	0.009	0.135	NA
PDGF subunit A.Olink	Tier 3	B.1.12m Tofacitinib 10mg vs TNFi	contrast (X)	0.031	0.447	HR	4.751	0.724	1.15	19.622
PDGF subunit A.Olink	Tier 3	B.1.12m Tofacitinib 5mg vs TNFi	contrast (X)	0.014	0.231	HR	5.193	0.668	1.402	19.226
PDGF subunit A.Olink	Tier 3	C.0 Overall	ANOVA	0.144	0.522	NA
PDGF subunit A.Olink	Tier 3	C.1.all Tofacitinib 10mg vs TNFi	contrast (Arm)	0.874	0.941	DeltaLog	0.025	0.159	-0.287	0.338
PDGF subunit A.Olink	Tier 3	C.1.all Tofacitinib 5mg vs TNFi	contrast (Arm)	0.565	0.73	DeltaLog	-0.106	0.185	-0.469	0.256
PDGF subunit A.Olink	Tier 3	C.2.ctrl Tofacitinib 10mg vs TNFi	contrast (Arm)	0.397	0.817	DeltaLog	-0.15	0.177	-0.497	0.197
PDGF subunit A.Olink	Tier 3	C.2.ctrl Tofacitinib 5mg vs TNFi	contrast (Arm)	0.14	0.434	DeltaLog	-0.303	0.205	-0.705	0.099
PDGF subunit A.Olink	Tier 3	C.3.case Tofacitinib 10mg vs TNFi	contrast (Arm)	0.037	0.547	DeltaLog	0.747	0.357	0.046	1.447
PDGF subunit A.Olink	Tier 3	C.3.case Tofacitinib 5mg vs TNFi	contrast (Arm)	0.091	0.752	DeltaLog	0.698	0.413	-0.11	1.507
PDGF subunit A.Olink	Tier 3	D.0 Overall	ANOVA	0.22	0.478	NA
PDGF subunit A.Olink	Tier 3	D.1.all Tofacitinib 10mg vs TNFi	contrast (Arm)	0.285	0.488	DeltaLog	-0.154	0.144	-0.436	0.128
PDGF subunit A.Olink	Tier 3	D.1.all Tofacitinib 5mg vs TNFi	contrast (Arm)	0.597	0.754	DeltaLog	0.089	0.169	-0.242	0.421
PDGF subunit A.Olink	Tier 3	D.2.ctrl Tofacitinib 10mg vs TNFi	contrast (Arm)	0.14	0.308	DeltaLog	-0.228	0.154	-0.53	0.075
PDGF subunit A.Olink	Tier 3	D.2.ctrl Tofacitinib 5mg vs TNFi	contrast (Arm)	0.945	0.965	DeltaLog	-0.013	0.181	-0.368	0.343
PDGF subunit A.Olink	Tier 3	D.3.case Tofacitinib 10mg vs TNFi	contrast (Arm)	0.386	0.907	DeltaLog	0.346	0.399	-0.436	1.128
PDGF subunit A.Olink	Tier 3	D.3.case Tofacitinib 5mg vs TNFi	contrast (Arm)	0.107	0.475	DeltaLog	0.754	0.468	-0.162	1.671
PDGF subunit A.Olink	Tier 3	E.0 Overall	ANOVA	0.075	0.369	NA
PDGF subunit A.Olink	Tier 3	E.1 Tofacitinib 10mg	contrast (CFB)	0.83	0.944	HR	0.935	0.314	0.506	1.729
PDGF subunit A.Olink	Tier 3	E.1 Tofacitinib 5mg	contrast (CFB)	0.73	0.981	HR	1.145	0.393	0.53	2.473
PDGF subunit A.Olink	Tier 3	E.1 TNFi	contrast (CFB)	0.031	0.653	HR	0.245	0.652	0.068	0.878
PDGF subunit A.Olink	Tier 3	F.0 Overall	interaction	0.047	0.297	NA
PDGF subunit A.Olink	Tier 3	F.1 Tofacitinib 10mg vs TNFi	contrast (CFB)	0.065	0.563	HR	3.821	0.727	0.919	15.892
PDGF subunit A.Olink	Tier 3	F.1 Tofacitinib 5mg vs TNFi	contrast (CFB)	0.042	0.757	HR	4.68	0.759	1.057	20.723
PDGF subunit A.Olink	Tier 3	G.0	contrast (Group)	0.336	0.875	DeltaLog	0.273	0.282	-0.291	0.837
PDGF subunit A.Olink	Tier 3	G.1	contrast (Group)	0.18	0.502	DeltaLog	-0.394	0.288	-0.978	0.191
PDGF subunit B.Olink	Tier 3	A.0.bl Overall, possible interaction	ANOVA	0.201	0.381	NA
PDGF subunit B.Olink	Tier 3	A.1.bl Overall, no interaction	contrast (X)	0.917	0.943	HR	0.983	0.161	0.718	1.347
PDGF subunit B.Olink	Tier 3	A.1.bl Tofacitinib 10mg	contrast (X)	0.979	0.998	HR	0.993	0.261	0.595	1.658
PDGF subunit B.Olink	Tier 3	A.1.bl Tofacitinib 5mg	contrast (X)	0.134	0.6	HR	1.425	0.236	0.897	2.263
PDGF subunit B.Olink	Tier 3	A.1.bl TNFi	contrast (X)	0.196	0.456	HR	0.672	0.308	0.368	1.228
PDGF subunit B.Olink	Tier 3	A.0.12m Overall, possible interaction	ANOVA	0.04	0.24	NA
PDGF subunit B.Olink	Tier 3	A.1.12m Overall, no interaction	contrast (X)	0.595	0.906	HR	0.924	0.148	0.692	1.235
PDGF subunit B.Olink	Tier 3	A.1.12m Tofacitinib 10mg	contrast (X)	0.726	0.992	HR	0.928	0.212	0.613	1.406
PDGF subunit B.Olink	Tier 3	A.1.12m Tofacitinib 5mg	contrast (X)	0.147	0.676	HR	1.394	0.229	0.89	2.186
PDGF subunit B.Olink	Tier 3	A.1.12m TNFi	contrast (X)	0.048	0.371	HR	0.432	0.425	0.188	0.994
PDGF subunit B.Olink	Tier 3	B.0.bl Overall	interaction	0.1	0.478	NA
PDGF subunit B.Olink	Tier 3	B.1.bl Tofacitinib 10mg vs TNFi	contrast (X)	0.335	0.845	HR	1.478	0.405	0.668	3.27
PDGF subunit B.Olink	Tier 3	B.1.bl Tofacitinib 5mg vs TNFi	contrast (X)	0.053	0.433	HR	2.12	0.389	0.989	4.544
PDGF subunit B.Olink	Tier 3	B.0.12m Overall	interaction	0.019	0.196	NA
PDGF subunit B.Olink	Tier 3	B.1.12m Tofacitinib 10mg vs TNFi	contrast (X)	0.11	0.654	HR	2.148	0.478	0.842	5.482
PDGF subunit B.Olink	Tier 3	B.1.12m Tofacitinib 5mg vs TNFi	contrast (X)	0.016	0.231	HR	3.226	0.486	1.244	8.369
PDGF subunit B.Olink	Tier 3	C.0 Overall	ANOVA	0.223	0.618	NA
PDGF subunit B.Olink	Tier 3	C.1.all Tofacitinib 10mg vs TNFi	contrast (Arm)	0.334	0.889	DeltaLog	0.177	0.183	-0.181	0.535
PDGF subunit B.Olink	Tier 3	C.1.all Tofacitinib 5mg vs TNFi	contrast (Arm)	0.729	0.852	DeltaLog	0.072	0.209	-0.337	0.482
PDGF subunit B.Olink	Tier 3	C.2.ctrl Tofacitinib 10mg vs TNFi	contrast (Arm)	0.835	0.973	DeltaLog	0.042	0.204	-0.357	0.442
PDGF subunit B.Olink	Tier 3	C.2.ctrl Tofacitinib 5mg vs TNFi	contrast (Arm)	0.512	0.78	DeltaLog	-0.153	0.233	-0.609	0.304
PDGF subunit B.Olink	Tier 3	C.3.case Tofacitinib 10mg vs TNFi	contrast (Arm)	0.079	0.547	DeltaLog	0.713	0.405	-0.081	1.508
PDGF subunit B.Olink	Tier 3	C.3.case Tofacitinib 5mg vs TNFi	contrast (Arm)	0.038	0.592	DeltaLog	0.96	0.462	0.054	1.866
PDGF subunit B.Olink	Tier 3	D.0 Overall	ANOVA	0.267	0.52	NA
PDGF subunit B.Olink	Tier 3	D.1.all Tofacitinib 10mg vs TNFi	contrast (Arm)	0.367	0.587	DeltaLog	-0.179	0.199	-0.569	0.21
PDGF subunit B.Olink	Tier 3	D.1.all Tofacitinib 5mg vs TNFi	contrast (Arm)	0.617	0.754	DeltaLog	0.113	0.225	-0.329	0.554
PDGF subunit B.Olink	Tier 3	D.2.ctrl Tofacitinib 10mg vs TNFi	contrast (Arm)	0.266	0.456	DeltaLog	-0.236	0.213	-0.653	0.18
PDGF subunit B.Olink	Tier 3	D.2.ctrl Tofacitinib 5mg vs TNFi	contrast (Arm)	0.915	0.955	DeltaLog	-0.026	0.242	-0.5	0.448
PDGF subunit B.Olink	Tier 3	D.3.case Tofacitinib 10mg vs TNFi	contrast (Arm)	0.578	0.907	DeltaLog	0.316	0.568	-0.797	1.429
PDGF subunit B.Olink	Tier 3	D.3.case Tofacitinib 5mg vs TNFi	contrast (Arm)	0.093	0.475	DeltaLog	1.067	0.635	-0.178	2.312
PDGF subunit B.Olink	Tier 3	E.0 Overall	ANOVA	0.111	0.382	NA
PDGF subunit B.Olink	Tier 3	E.1 Tofacitinib 10mg	contrast (CFB)	0.721	0.944	HR	0.926	0.215	0.607	1.412
PDGF subunit B.Olink	Tier 3	E.1 Tofacitinib 5mg	contrast (CFB)	0.358	0.981	HR	1.436	0.393	0.664	3.103
PDGF subunit B.Olink	Tier 3	E.1 TNFi	contrast (CFB)	0.09	0.708	HR	0.443	0.481	0.173	1.137
PDGF subunit B.Olink	Tier 3	F.0 Overall	interaction	0.061	0.315	NA
PDGF subunit B.Olink	Tier 3	F.1 Tofacitinib 10mg vs TNFi	contrast (CFB)	0.168	0.765	HR	2.09	0.535	0.732	5.964
PDGF subunit B.Olink	Tier 3	F.1 Tofacitinib 5mg vs TNFi	contrast (CFB)	0.058	0.776	HR	3.24	0.62	0.962	10.916
PDGF subunit B.Olink	Tier 3	G.0	contrast (Group)	0.357	0.875	DeltaLog	0.33	0.355	-0.383	1.043
PDGF subunit B.Olink	Tier 3	G.1	contrast (Group)	0.253	0.557	DeltaLog	-0.449	0.385	-1.234	0.337
PLA2G7.Olink	Tier 3	A.0.bl Overall, possible interaction	ANOVA	0.45	0.566	NA
PLA2G7.Olink	Tier 3	A.1.bl Overall, no interaction	contrast (X)	0.564	0.926	HR	0.914	0.156	0.673	1.24
PLA2G7.Olink	Tier 3	A.1.bl Tofacitinib 10mg	contrast (X)	0.928	0.991	HR	1.019	0.21	0.676	1.538
PLA2G7.Olink	Tier 3	A.1.bl Tofacitinib 5mg	contrast (X)	0.965	0.998	HR	0.986	0.328	0.518	1.875
PLA2G7.Olink	Tier 3	A.1.bl TNFi	contrast (X)	0.096	0.361	HR	0.654	0.256	0.396	1.079
PLA2G7.Olink	Tier 3	A.0.12m Overall, possible interaction	ANOVA	0.708	0.854	NA
PLA2G7.Olink	Tier 3	A.1.12m Overall, no interaction	contrast (X)	0.967	0.992	HR	0.993	0.171	0.711	1.387
PLA2G7.Olink	Tier 3	A.1.12m Tofacitinib 10mg	contrast (X)	0.7	0.992	HR	1.095	0.236	0.69	1.739
PLA2G7.Olink	Tier 3	A.1.12m Tofacitinib 5mg	contrast (X)	0.215	0.704	HR	0.743	0.24	0.465	1.188
PLA2G7.Olink	Tier 3	A.1.12m TNFi	contrast (X)	0.812	0.927	HR	1.136	0.536	0.397	3.252
PLA2G7.Olink	Tier 3	B.0.bl Overall	interaction	0.343	0.654	NA
PLA2G7.Olink	Tier 3	B.1.bl Tofacitinib 10mg vs TNFi	contrast (X)	0.182	0.761	HR	1.559	0.333	0.812	2.993
PLA2G7.Olink	Tier 3	B.1.bl Tofacitinib 5mg vs TNFi	contrast (X)	0.326	0.673	HR	1.508	0.418	0.664	3.424
PLA2G7.Olink	Tier 3	B.0.12m Overall	interaction	0.5	0.849	NA
PLA2G7.Olink	Tier 3	B.1.12m Tofacitinib 10mg vs TNFi	contrast (X)	0.949	0.985	HR	0.964	0.581	0.308	3.011
PLA2G7.Olink	Tier 3	B.1.12m Tofacitinib 5mg vs TNFi	contrast (X)	0.47	0.808	HR	0.654	0.588	0.207	2.069
PLA2G7.Olink	Tier 3	C.0 Overall	ANOVA	0.396	0.719	NA
PLA2G7.Olink	Tier 3	C.1.all Tofacitinib 10mg vs TNFi	contrast (Arm)	0.195	0.763	DeltaLog	0.086	0.067	-0.044	0.217
PLA2G7.Olink	Tier 3	C.1.all Tofacitinib 5mg vs TNFi	contrast (Arm)	0.376	0.73	DeltaLog	0.068	0.077	-0.083	0.219
PLA2G7.Olink	Tier 3	C.2.ctrl Tofacitinib 10mg vs TNFi	contrast (Arm)	0.596	0.894	DeltaLog	0.039	0.074	-0.106	0.184
PLA2G7.Olink	Tier 3	C.2.ctrl Tofacitinib 5mg vs TNFi	contrast (Arm)	0.793	0.865	DeltaLog	0.022	0.086	-0.146	0.191
PLA2G7.Olink	Tier 3	C.3.case Tofacitinib 10mg vs TNFi	contrast (Arm)	0.058	0.547	DeltaLog	0.289	0.152	-0.01	0.587
PLA2G7.Olink	Tier 3	C.3.case Tofacitinib 5mg vs TNFi	contrast (Arm)	0.129	0.752	DeltaLog	0.265	0.174	-0.077	0.606
PLA2G7.Olink	Tier 3	D.0 Overall	ANOVA	0.897	0.972	NA
PLA2G7.Olink	Tier 3	D.1.all Tofacitinib 10mg vs TNFi	contrast (Arm)	0.645	0.826	DeltaLog	0.032	0.07	-0.105	0.17
PLA2G7.Olink	Tier 3	D.1.all Tofacitinib 5mg vs TNFi	contrast (Arm)	0.955	0.969	DeltaLog	0.005	0.081	-0.155	0.164
PLA2G7.Olink	Tier 3	D.2.ctrl Tofacitinib 10mg vs TNFi	contrast (Arm)	0.566	0.715	DeltaLog	0.043	0.075	-0.104	0.191
PLA2G7.Olink	Tier 3	D.2.ctrl Tofacitinib 5mg vs TNFi	contrast (Arm)	0.718	0.834	DeltaLog	0.031	0.087	-0.14	0.203
PLA2G7.Olink	Tier 3	D.3.case Tofacitinib 10mg vs TNFi	contrast (Arm)	0.798	0.947	DeltaLog	-0.052	0.202	-0.448	0.345
PLA2G7.Olink	Tier 3	D.3.case Tofacitinib 5mg vs TNFi	contrast (Arm)	0.418	0.7	DeltaLog	-0.188	0.233	-0.644	0.267
PLA2G7.Olink	Tier 3	E.0 Overall	ANOVA	0.506	0.848	NA
PLA2G7.Olink	Tier 3	E.1 Tofacitinib 10mg	contrast (CFB)	0.792	0.944	HR	1.076	0.278	0.624	1.855
PLA2G7.Olink	Tier 3	E.1 Tofacitinib 5mg	contrast (CFB)	0.192	0.981	HR	0.737	0.234	0.466	1.166
PLA2G7.Olink	Tier 3	E.1 TNFi	contrast (CFB)	0.51	0.89	HR	1.567	0.682	0.412	5.966
PLA2G7.Olink	Tier 3	F.0 Overall	interaction	0.311	0.747	NA
PLA2G7.Olink	Tier 3	F.1 Tofacitinib 10mg vs TNFi	contrast (CFB)	0.607	0.928	HR	0.687	0.731	0.164	2.876
PLA2G7.Olink	Tier 3	F.1 Tofacitinib 5mg vs TNFi	contrast (CFB)	0.295	0.954	HR	0.47	0.72	0.115	1.93
PLA2G7.Olink	Tier 3	G.0	contrast (Group)	0.217	0.875	DeltaLog	0.12	0.096	-0.073	0.312
PLA2G7.Olink	Tier 3	G.1	contrast (Group)	0.038	0.383	DeltaLog	0.249	0.115	0.015	0.484
PON3.Olink	Tier 3	A.0.bl Overall, possible interaction	ANOVA	0.049	0.245	NA
PON3.Olink	Tier 3	A.1.bl Overall, no interaction	contrast (X)	0.631	0.938	HR	0.938	0.132	0.724	1.217
PON3.Olink	Tier 3	A.1.bl Tofacitinib 10mg	contrast (X)	0.188	0.936	HR	0.813	0.157	0.597	1.106
PON3.Olink	Tier 3	A.1.bl Tofacitinib 5mg	contrast (X)	0.09	0.587	HR	1.977	0.402	0.899	4.35
PON3.Olink	Tier 3	A.1.bl TNFi	contrast (X)	0.353	0.625	HR	0.729	0.341	0.374	1.421
PON3.Olink	Tier 3	A.0.12m Overall, possible interaction	ANOVA	0.169	0.419	NA
PON3.Olink	Tier 3	A.1.12m Overall, no interaction	contrast (X)	0.015	0.273	HR	0.759	0.114	0.607	0.948
PON3.Olink	Tier 3	A.1.12m Tofacitinib 10mg	contrast (X)	0.024	0.571	HR	0.72	0.145	0.542	0.957
PON3.Olink	Tier 3	A.1.12m Tofacitinib 5mg	contrast (X)	0.837	0.9	HR	0.96	0.197	0.653	1.413
PON3.Olink	Tier 3	A.1.12m TNFi	contrast (X)	0.284	0.678	HR	0.708	0.322	0.376	1.332
PON3.Olink	Tier 3	B.0.bl Overall	interaction	0.022	0.322	NA
[truncated: 9,194 more rows]
